# Supplementary material for: Strategies for Identifying RNA Splicing Regulatory Motifs and Predicting Alternative Splicing Events
Source: PLoS Comput Biol. 2008 Jan 25;4(1):e21. doi: 10.1371/journal.pcbi.0040021 (PMC2217580; doi:10.1371/journal.pcbi.0040021)
Supplement: Dataset S1 — (1.4 MB XLS) [file pcbi.0040021.sd001.xls]

## Sheet: Combined set
RESCUE-ESE	ESS-HEX-2	ESS-HEX-3	PESE	PESS	ESR	ISRE	NI-ESE	NI-ESS
AAAAAG	AAGGGG	ACTAGG	aaaaagga	aaaaaaaa	AAAGAA	GTTTGT	AAAACA	AAATTA
AAAACC	AAGTGA	AGGGGG	aaaagaag	aaaaaaat	AAAGAT	TCTCC	AAAACG	AAATTT
AAAAGA	AAGTTT	AGGGGT	aaaaggaa	aaaaaaca	AAAGCA	GATTTT	AAAACT	AATATA
AAAAGC	AATGGG	AGGGTA	aaacagaa	aaaaaata	AAAGGA	TTTTTC	AAACAA	AATATT
AAACAG	ACTAGG	AGGGTG	aaacagca	aaaaaatg	AAAGTA	TAACC	AAACCC	AATTAT
AAACCA	AGATGG	AGGGTT	aaacctgc	aaaaaggt	AACAAC	TTGAAAT	AAACCG	AATTTT
AAACCT	AGATTA	AGGTAA	aaacggag	aaaaagtt	AACAGC	AAGCCA	AAAGCC	AGGTTG
AAACGA	AGCCGG	AGGTAG	aaactgaa	aaaaataa	AACATC	AATTG	AAAGCG	AGTTAT	Reference:
AAACTC	AGGGGG	AGGTAT	aaagaaac	aaaaatag	AACATG	CTGCT	AACACG	ATAATA	Holste, D. and Ohler, U. E-mail: holste@imp.ac.at (DH), uwe.ohler@duke.edu (UO). Supplementary material.
AAAGAA	AGGGGT	AGGTTA	aaagaaag	aaaaatat	AACCAG	TTTATG	AACAGG	ATAGGT
AAAGAC	AGGGTA	AGGTTT	aaagaaga	aaaaatgc	AACCTC	TTCACA	AACATC	ATAGTA
AAAGAG	AGGGTG	AGTAGG	aaagaagg	aaaaatgt	AACCTG	TGATAA	AACCAC	ATATAC
AAAGAT	AGGGTT	AGTCGT	aaagaccc	aaaataaa	AACTAC	ATGTTT	AACCCG	ATTAGT
AAAGCA	AGGTAA	AGTGTA	aaagacga	aaaatatc	AACTGG	TCCAG	AACCGG	ATTATA
AAAGCT	AGGTAG	AGTGTT	aaagagaa	aaaatgat	AACTTC	TTTCCAA	AACGAC	ATTATG
AAAGGA	AGGTAT	AGTTAG	aaagagac	aaaatgca	AAGAAA	TTATTTC	AACGAT	ATTCTA
AAATCC	AGGTGG	AGTTCG	aaagagga	aaaatgct	AAGAAG	TGTGTT	AACGTG	ATTCTT
AACAAC	AGGTTA	AGTTCT	aaagcaag	aaaatggt	AATGAA	TCTTG	AACTCC	ATTTAG
AACAAG	AGGTTT	AGTTGT	aaagctga	aaaatgta	AATGAC	TTGTAA	AACTGC	ATTTTC
AACAGA	AGTAGG	AGTTTA	aaaggaag	aaaatgtc	AATGCA	CTTGAC	AACTTG	ATTTTG
AACATG	AGTATA	AGTTTG	aaaggaga	aaaatgtt	AATGCC	TTAAAAC	AAGAGC	CAGTTT
AACCAA	AGTCCG	ATGGGG	aaagtgac	aaacaaaa	AATGCT	CTAAC	AAGAGT	CATATT
AACCAG	AGTCGT	CCTGGG	aaagtgag	aaacatgt	AATGGA	AAAGCT	AAGATT	CATGGG
AACGAA	AGTGTA	CGTTCC	aaatcccg	aaacctta	AATGGT	TCTTC	AAGCAC	CATTTA
AACTAC	AGTGTT	CTAGGG	aaatccga	aaaccttt	AATGTA	TGCATG	AAGCCC	CGGGGT
AACTGG	AGTTAG	CTTAGG	aaatccgg	aaactgtt	ACAGAA	TTCTT	AAGCCT	CGGTTT
AACTTC	AGTTCG	GATGGG	aacaagaa	aaagcttt	ACCAAA	ACATTT	AAGTGA	CGTTTA
AAGAAA	AGTTCT	GGATGG	aacaagga	aaagtata	ACCAAC	TTTATC	AATCTG	CGTTTT
AAGAAC	AGTTGT	GGGAGG	aacaccaa	aaataaaa	ACCAAG	ATTTTCT	ACAACA	CTAATG
AAGAAG	AGTTTA	GGGATG	aacacctc	aaataaca	ACCAGC	GCTGACC	ACAACC	CTAGTT
AAGAAT	AGTTTC	GGGGAG	aacagaaa	aaatagct	ACCATC	ATAATT	ACAAGG	CTATAT
AAGACA	AGTTTG	GGGGAT	aacagaag	aaataggt	ACCATG	AACAG	ACAAGT	CTATGT
AAGACT	AGTTTT	GGGGGA	aacagaga	aaatatat	ACCTAC	CATTTG	ACACCT	CTCTTT
AAGAGA	ATAGGG	GGGGGG	aacagagg	aaatcgtt	ACCTTC	TTTCAG	ACACGA	CTTAAT
AAGAGG	ATAGTT	GGGGGT	aacatctg	aaatgaca	ACTGCA	TTAGCA	ACAGAC	CTTATA
AAGATC	ATGGGG	GGGGTA	aaccaaca	aaatgata	ACTGGA	TTGCCT	ACAGCA	CTTATT
AAGATG	ATTAGG	GGGGTG	aaccaaga	aaatgatg	ACTGTA	CAAAT	ACAGCT	CTTGTT
AAGCAA	CCAAGG	GGGGTT	aaccacca	aaatgcag	ACTGTG	TTTAAC	ACCAAA	CTTTGT
AAGCAG	CCACTA	GGGTAA	aaccacga	aaatgctt	AGAGAA	TAATG	ACCAAT	CTTTTA
AAGCCA	CCGTTC	GGGTAG	aaccacgt	aaatggct	AGAGGA	AGAAAT	ACCACC	CTTTTG
AAGCTA	CCTGGG	GGGTGG	aaccagaa	aaatgggg	AGCAAA	TTTTGAT	ACCAGG	GGGGGC
AAGGAA	CGGGGG	GGGTTA	aaccagca	aaatgggt	AGCAAG	TAACT	ACCATG	GGGTAT
AAGGAC	CGTAGG	GGGTTT	aaccagcc	aaatggta	AGCATC	TAAAAT	ACCATT	GGTAAT
AAGGAG	CGTTCA	GGTAAG	aaccagga	aaatggtc	AGCATG	AATTACA	ACCCAA	GGTATT
AAGGAT	CGTTCC	GGTAGG	aaccatca	aaatggtt	AGCTAC	TTCAAAA	ACCCTC	GGTGTT
AATACG	CGTTCG	GGTAGT	aacccgga	aaatgtaa	AGTGAA	TTTATA	ACCGAG	GGTTAA
AATCAA	CGTTCT	GGTATA	aaccctgc	aaatgtag	AGTGAC	CTTGTC	ACCGGC	GGTTGT
AATCAG	CTAGGG	GGTGGG	aaccctgg	aaatgtca	AGTGCA	TTTACAG	ACCTCG	GGTTTC
AATCCA	CTAGGT	GGTTAG	aaccgagg	aaatgtct	AGTGCC	TGGATTT	ACGAAT	GTAATT
AATGAA	CTTAGG	GGTTTA	aaccggtc	aaatgtta	AGTGCT	TTGCATT	ACGACA	GTATAA
AATGAC	CTTAGT	GGTTTG	aacctgac	aaatgttt	AGTGGT	TTAAG	ACGACG	GTATGG
AATGGA	CTTGGG	GGTTTT	aacctgag	aacacaca	ATAGAA	TTGGT	ACGAGC	GTATTA
ACAAAG	GATAGG	GTAAGG	aacctgcc	aacagggt	ATATTT	CATAAA	ACGGAA	GTCTTT
ACAACG	GATGGG	GTAAGT	aacctggc	aacagttt	ATCAAC	TGATTA	ACGGAC	GTGTAT
ACAACT	GATTAG	GTAGGG	aacgactg	aacatata	ATCAAG	GCTTTGC	ACGGAG	GTGTGT
ACAAGA	GCTTAG	GTAGGT	aacgagaa	aaccgttt	ATCACC	ATTAG	AGAAAT	GTGTTC
ACAGAA	GGAGGG	GTAGTT	aacgagga	aacctttt	ATCAGC	TTTTAAA	AGACAG	GTTAAA
ACATGA	GGATGG	GTATAG	aacgattc	aacgcttt	ATCATC	ACTAAT	AGACCG	GTTAAT
ACCTGA	GGCTTA	GTCGTT	aacgcaag	aactgtta	ATCATG	CTGACT	AGACGC	GTTATA
ACGAAA	GGGAGG	GTGGGG	aacgcgaa	aaggtata	ATCCAG	ATATTT	AGACGT	GTTCTT
ACGAAG	GGGATG	GTGGGT	aacggagg	aaggtatg	ATCTAC	CATTTA	AGACTC	GTTTAC
ACGACT	GGGGAG	GTGTAG	aacgttga	aagtaatg	ATCTGC	AAATCT	AGACTG	GTTTCG
ACGCAA	GGGGAT	GTTAGG	aactacga	aagtatag	ATCTTC	TTTTGGC	AGAGCA	GTTTGC
ACTACA	GGGGGA	GTTAGT	aactagaa	aataatgt	ATTGAA	TCTTT	AGAGCT	GTTTTA
ACTGAA	GGGGGG	GTTCCT	aactcacc	aatagggt	ATTGAT	TTATTGA	AGAGGT	GTTTTC
ACTGGA	GGGGGT	GTTCGT	aactcgaa	aataggtg	ATTGCT	TCAGA	AGATAC	TAAATT
ACTTCA	GGGGTA	GTTCTG	aactcgga	aatagtat	ATTGGA	TAAGT	AGATCA	TAAGGG
ACTTCG	GGGGTG	GTTGTT	aactctac	aatatata	ATTGGT	CTCTG	AGATCT	TAATAA
AGAAAA	GGGGTT	GTTTAG	aactctgc	aatatggt	ATTGTA	TCTGG	AGCAAC	TAATTG
AGAAAC	GGGTAA	GTTTGG	aactgaag	aatgcaaa	ATTTTA	AATTC	AGCAAT	TACTAT
AGAAAG	GGGTAG	GTTTGT	aactgacc	aatgcata	CAAAGA	TTTTCC	AGCACC	TACTTA
AGAACA	GGGTGG	TAAGTG	aactgacg	aatgccca	CAAGAA	TTTTGC	AGCCTG	TAGGTG
AGAACT	GGGTGT	TAGGGG	aactggaa	aatgctta	CAAGAT	GTGAG	AGCGAA	TAGTTC
AGAAGA	GGGTTA	TAGGGT	aactggac	aatggaac	CAAGCA	TCCATTT	AGCGGA	TAGTTG
AGAAGC	GGGTTG	TAGGTA	aactggag	aatggatg	CAAGCT	AATTTT	AGCTGC	TATACA
AGAAGG	GGGTTT	TAGGTT	aactggca	aatgggtt	CAAGGA	CTTGATT	AGGACG	TATCTA
AGAAGT	GGTAAG	TAGTGG	aactggcc	aatggtta	CAAGTA	GTAAG	ATCAAC	TATGTG
AGAATG	GGTAGG	TAGTGT	aacttcac	aatggttt	CAAGTG	ATGAAA	ATCAGG	TATTAG
AGACAA	GGTAGT	TAGTTA	aacttgga	aatgtaaa	CAAGTT	AGAAAA	ATCAGT	TCGTTT
AGACAT	GGTATA	TAGTTT	aactttgc	aatgtata	CACAAC	TGGCTT	ATCCAG	TCTATA
AGACGA	GGTGGG	TATAGG	aagaaaag	aatgtatc	CACAAG	CTCAG	ATCCTC	TCTTAG
AGAGAA	GGTGTG	TCCTGG	aagaaacg	aatgtatg	CACATG	TGGAAAT	ATCGAA	TCTTTC
AGAGAT	GGTTAG	TCGTTC	aagaaact	aatgtctt	CACTGG	AATTAT	ATGAAC	TGGGTA
AGAGGA	GGTTAT	TCTAGG	aagaaaga	aatgtgta	CATGAA	AATAAT	ATGACC	TGGGTT
AGATGA	GGTTGG	TGGGGG	aagaaagt	aatgttaa	CATGCA	TCCTAG	ATGACG	TGGTAT
AGATGC	GGTTTA	TGGGTG	aagaaccg	aatgttat	CCAAAT	CCACAG	ATGAGG	TGGTTG
AGATGT	GGTTTG	TGGTGG	aagaacct	aatgttta	CCAGAA	TCATTTC	ATGGAC	TGTTAC
AGCAAA	GGTTTT	TGTTAG	aagaacga	aatgtttc	CCAGGA	AAAGCA	ATGGAG	TTAAGT
AGCAGA	GTAAGG	TGTTCC	aagaagaa	aattaggt	CCCAAA	AAATGA	CAAACC	TTACTT
AGGAAA	GTAAGT	TTAGGG	aagaagac	aattatgt	CCCAAC	TTTATAG	CAAAGC	TTAGTC
AGGAAC	GTAGGG	TTAGGT	aagaagag	aattattt	CCCAAG	ATTAAAT	CAACAA	TTATAG
AGGAAG	GTAGGT	TTAGTG	aagaagat	aattcttt	CCCAGC	CCTGCAG	CAACAG	TTATCT
AGGACA	GTAGTT	TTAGTT	aagaagca	aatttaaa	CCCAGG	TTACAG	CAACCC	TTATTC
AGGAGA	GTATAG	TTCCTG	aagaagcc	aattttat	CCCAGT	AAATGT	CAACCT	TTCCTA
AGTGAA	GTCCGT	TTCGTT	aagaagcg	acaaaaaa	CCCATC	TGCAT	CAACTG	TTCGTG
AGTGAC	GTCGTT	TTCTAG	aagaagga	acaaaatg	CCCATG	CTTCT	CAAGAG	TTCTTG
ATCAAA	GTGGCA	TTGGGG	aagaagta	acaaatgg	CCCTAC	TTAGAA	CAAGCA	TTGGGT
ATCAAG	GTGGGG	TTGTTC	aagaatcc	acaattta	CCCTGC	TGTTTC	CAAGCT	TTGGTT
ATCAAT	GTGGGT	TTTAGG	aagaattc	acacaaaa	CCCTTC	TTTAC	CACAAG	TTGTAA
ATCAGA	GTGGTT	TTTAGT	aagacacc	acacacaa	CCTGGA	GTTTT	CACCAG	TTGTCT
ATCCAA	GTGTAG	TTTGGG	aagacatc	acacacac	CCTGGT	CTTCCA	CACGAC	TTTAAG
ATCTTC	GTGTGG	TTTGTT	aagacatt	acacacat	CGAGAA	TTCTAG	CACTGG	TTTATC
ATGAAA	GTGTTA	TTTTGG	aagaccag	acacataa	CGAGGA	AAATT	CAGACA	TTTCTG
ATGAAG	GTTAGG	0	aagaccca	acacatgt	CGCCAG	TTAAAC	CAGACC	TTTGGT
ATGAGA	GTTAGT	0	aagaccct	acactcac	CGCCTG	TGAGAA	CAGACG	TTTGTC
ATGATG	GTTCCG	0	aagacgaa	acagtatg	CGCTGG	TTTGTAG	CAGAGT	TTTGTG
ATGCAA	GTTCCT	0	aagagaaa	acagtttg	CGGAAG	GTCAGT	CAGCAC	TTTTAC
ATGGAA	GTTCGT	0	aagagaag	acataaaa	CGTGGT	TAAGA	CAGCAT	TTTTCC
ATGGAT	GTTCTA	0	aagagacc	acatacat	CTAAAT	AAATCA	CAGCCA	TTTTCG
ATGGCG	GTTCTG	0	aagagagg	acatatat	CTAGAA	TGTTGA	CAGCGA	TTTTGC
ATGGTC	GTTGGG	0	aagaggaa	acatgggt	CTAGAT	CTTGC	CAGCTA	0
ATTCAG	GTTGTT	0	aagaggac	acatgtta	CTCAAC	TAATTTG	CAGCTT	0
ATTGGA	GTTTAG	0	aagaggag	acattaat	CTCAAG	CCTCT	CAGGAT	0
CAAAAC	GTTTCC	0	aagaggcc	acattata	CTCACC	TGGTTT	CAGGGA	0
CAAAAG	GTTTCT	0	aagatcct	acattatg	CTCATC	TGATTTC	CATCAA	0
CAAACA	GTTTGG	0	aagcaaag	actattta	CTCATG	TGTTAA	CATGAA	0
CAAAGA	GTTTGT	0	aagcaacc	actcacac	CTCTTC	TGTGTC	CATGAG	0
CAACTT	GTTTTG	0	aagcaacg	actttttt	CTGAAG	TCTCT	CATGGA	0
CAAGAA	GTTTTT	0	aagcaaga	agaatggt	CTGGAG	TTAACA	CCAACT	0
CAAGAT	TAAGTG	0	aagcaagg	agatgctt	CTTCCT	TTTGGT	CCAAGG	0
CAAGTA	TAAGTT	0	aagcagaa	agatggtg	CTTGCT	TGTCT	CCAGAG	0
CAATCA	TAATGG	0	aagcagga	agatggtt	CTTGGA	TTCCTT	CCAGAT	0
CAGAAA	TACTAG	0	aagcccgt	agattagg	CTTGTA	TGAATT	CCATCA	0
CAGAAG	TAGGGG	0	aagccctg	aggatggg	CTTGTT	AATTTA	CCCAGA	0
CAGAAT	TAGGGT	0	aagccggt	agggatgg	GAAAAT	GTTTCT	CCCAGC	0
CAGAGG	TAGGTA	0	aagcggaa	aggggatg	GAAGAA	TGCTAA	CCCCTG	0
CAGATC	TAGGTT	0	aagcggtg	aggggtct	GAAGAT	AGATTT	CCCGAA	0
CAGGAA	TAGTAT	0	aagcgtct	aggggttg	GAAGCA	GAAAAT	CCCGGC	0
CATCAG	TAGTGG	0	aagctcag	agggtatg	GAAGGA	GTTTAAT	CCCTGT	0
CCTGAA	TAGTGT	0	aagctcga	agggtcat	GAAGTA	TTTGACT	CCGAAA	0
CGAAAA	TAGTTA	0	aagctgac	aggtatat	GAAGTT	TCTGA	CCGAAC	0
CGAACA	TAGTTT	0	aagctgag	aggtcatg	GACAAC	TCTGTT	CCGAAT	0
CGAAGA	TATAGG	0	aagctgga	agtaaaaa	GACAAG	TTTATTC	CCGACG	0
CGAATG	TATGGG	0	aaggaact	agtaatgt	GACAGA	TGAAAG	CCGGAC	0
CGACGA	TCCGTT	0	aaggaaga	agtataga	GACAGC	TGTTCT	CCGTGA	0
CGTATG	TCCTGG	0	aaggaagt	agtatgtt	GACATC	CTTTT	CCGTGG	0
CGTCGC	TCGTTC	0	aaggaatt	agttattt	GACATG	ATTTGT	CCTGAT	0
CTACAT	TCTAGG	0	aaggacct	agttctta	GACCAG	TGAGT	CCTGTC	0
CTCCAT	TGGGAG	0	aaggactg	agtttaaa	GACCTC	CCCCAG	CGAAAC	0
CTGAAA	TGGGGA	0	aaggactt	ataaaaaa	GACCTG	TTGCAG	CGAAAG	0
CTGAAG	TGGGGG	0	aaggagaa	ataaaatg	GACTAC	CTGAT	CGAACC	0
CTTCAG	TGGGGT	0	aaggagac	ataaatat	GACTGG	TAATA	CGAACT	0
GAAAAA	TGGGTG	0	aaggagat	ataacact	GACTTC	TCTTA	CGAAGC	0
GAAAAC	TGGTGG	0	aaggagca	ataatgca	GAGAAG	ATTCT	CGAAGT	0
GAAAAG	TGTAGG	0	aaggagga	ataatgta	GATGAA	ATCAAA	CGACAA	0
GAAAAT	TGTAGT	0	aaggagta	ataattag	GATGAC	CTTTA	CGACCA	0
GAAACA	TGTTAG	0	aaggggaa	atacaaat	GATGCA	TTTAG	CGACCT	0
GAAACC	TGTTCC	0	aaggtgaa	atacacac	GATGCC	TTGCTG	CGACTC	0
GAAACG	TGTTTC	0	aagtagaa	atacacat	GATGCT	TTTCAT	CGAGAA	0
GAAACT	TTAGAT	0	aagtagga	atacatat	GATGGA	CTTTCA	CGAGAC	0
GAAAGA	TTAGGG	0	aagtcaac	atacatta	GATGGC	TTCTC	CGAGAG	0
GAAAGC	TTAGGT	0	aagtcgaa	ataccgtt	GATGGT	TGCTT	CGAGAT	0
GAAATC	TTAGTA	0	aagtgaga	atacttta	GATGTC	TCTGC	CGAGCT	0
GAACAA	TTAGTG	0	aagtggaa	atagatat	GATGTT	CTGAA	CGATGA	0
GAACAT	TTAGTT	0	aagtggac	ataggggt	GCAAAT	GTAGGT	CGCAGA	0
GAACCA	TTATGG	0	aagtggcc	ataggtat	GCAAGA	CTAAA	CGCTGA	0
GAACTG	TTCCGT	0	aataagga	atagtact	GCAGAA	GTAAC	CGGAAA	0
GAACTT	TTCCTG	0	aatcagaa	atagttaa	GCAGAG	AAGTGT	CGGAAT	0
GAAGAA	TTCCTT	0	aatcagac	atagttta	GCAGAT	GTTTGT	CGGACA	0
GAAGAC	TTCGTA	0	aatcctgc	atagtttg	GCCAAA	ATTAACA	CGGACG	0
GAAGAG	TTCGTT	0	aatcgact	atataaaa	GCCAAC	TGAAG	CGGACT	0
GAAGAT	TTCTAG	0	aatcggtg	atataaat	GCCAAG	TAACC	CGGAGC	0
GAAGCA	TTCTGT	0	aatctgac	atataatg	GCCACC	TTGAAAT	CGGATC	0
GAAGGA	TTGGGG	0	aatctgag	atatacat	GCCAGC	AATTG	CGTCGA	0
GAAGTA	TTGTTA	0	acaaagaa	atatactt	GCCAGG	CTGCT	CTAGAA	0
GAAGTT	TTGTTC	0	acaaagga	atatagat	GCCATC	TTTATG	CTCAAC	0
GAATCA	TTGTTG	0	acaaagtc	atatagtt	GCCATG	TGATAAA	CTCAGC	0
GACAAA	TTGTTT	0	acaacgtc	atatataa	GCCATT	ATGTTT	CTCCAA	0
GACAAT	TTTACC	0	acaacgtg	atatatac	GCCTGC	TTTCCAA	CTCCAG	0
GACGAA	TTTAGG	0	acaacttc	atatatag	GCCTGG	AAGTC	CTCCTC	0
GACGAC	TTTAGT	0	acaagaag	atatatat	GCCTTC	AAAGA	CTCGAC	0
GAGAAA	TTTCTA	0	acaagacc	atatatcc	GCCTTG	GTACGT	CTCTGA	0
GAGAAG	TTTGGG	0	acaagatt	atatatgt	GCGGCG	GTTAAA	CTCTGG	0
GAGAGA	TTTGTT	0	acaagctg	atatatta	GCTGCA	GAGCTG	CTGAAT	0
GAGATG	TTTTAG	0	acaaggag	atatattg	GCTGCC	TCATTTT	CTGACA	0
GAGGAA	TTTTGG	0	acaagtgg	atatattt	GCTGCT	TGCATG	CTGACT	0
GAGGAG	0	0	acacagag	atatcatg	GCTGGT	TTCTT	CTGAGA	0
GAGGAT	0	0	acaccaag	atatcttt	GCTGTG	TTTATC	CTGCAA	0
GATATC	0	0	acaccatc	atatgcat	GCTGTT	ACATTT	CTGCAC	0
GATATG	0	0	acacctgc	atatgcct	GGAAGA	TGCCAGC	CTGCCG	0
GATCAA	0	0	acagaaac	atatgcta	GGAGAA	ATAATT	CTGGCC	0
GATCAT	0	0	acagaaga	atatggtt	GGAGCA	GTAGG	CTTGAC	0
GATGAA	0	0	acagaagc	atatgtat	GGAGGA	GTATCCT	GAACCG	0
GATGAG	0	0	acagaagg	atatgtca	GGCAAC	CATTTG	GAACGT	0
GATGAT	0	0	acagagga	atatgtct	GGCATC	ACTAAC	GAACTA	0
GATGCA	0	0	acagaggg	atatgtgt	GGCATG	TTTCAG	GAACTC	0
GATGGA	0	0	acagagtc	atatgtta	GGCTAC	AATTGA	GAAGGC	0
GATTCA	0	0	acagcatc	atatgttt	GGCTGC	TTAGCA	GAAGTC	0
GCAAAA	0	0	acagctga	atattaaa	GGCTGG	CAAAT	GAATCC	0
GCAAGA	0	0	acagctgg	atattaat	GGCTGT	TAATG	GAATCT	0
GCAGAA	0	0	acaggaac	atattaga	GGGAAG	TTTTGAT	GACAAC	0
GCGAAT	0	0	acaggact	atattgtt	GGTGAA	AGAAAT	GACACC	0
GGAAAA	0	0	acaggagg	atatttaa	GGTGCT	TTTCTA	GACACT	0
GGAAAC	0	0	acaggatc	atatttat	GGTGGA	TATTTC	GACAGA	0
GGAAGA	0	0	acagtgag	atatttgt	GTAGAA	TAACT	GACCAC	0
GGAGAA	0	0	acatcagc	atattttt	GTAGCT	TGAGG	GACCCG	0
GGAGAT	0	0	acatcagg	atctattt	GTCACC	TAAAAT	GACCGA	0
GGAGGA	0	0	acatcatc	atgaaatg	GTCAGC	TTTATA	GACCTA	0
GGATCA	0	0	acatccct	atgaatgt	GTCATC	TATCCT	GACCTC	0
GTCAAG	0	0	acatccgc	atgagggg	GTCATG	GTTAGT	GACGAG	0
GTCGAC	0	0	acatccgg	atgcaaaa	GTCTAC	TTTACAG	GACTGC	0
GTGAAG	0	0	acatcctg	atgcacat	GTCTTC	TATTTG	GACTGT	0
GTGTCG	0	0	acatcggg	atgcaggc	GTGAAG	GTACTGT	GAGAAT	0
GTTGGA	0	0	acatctga	atgcataa	GTTCTT	TTAAG	GAGACG	0
TACAAG	0	0	acatctgc	atgcatag	GTTGCT	CATAAA	GAGACT	0
TACAGA	0	0	acatctgg	atgcatat	GTTGGA	GCATG	GAGAGC	0
TATGAA	0	0	acattgac	atgcatgc	GTTGGT	TGATTA	GAGATT	0
TATGGA	0	0	acattgag	atgccact	GTTGTT	TTTTAAA	GAGCAA	0
TCAACG	0	0	accaacaa	atgctaaa	TACAAC	CTGACT	GAGCCC	0
TCAAGA	0	0	accaacag	atgctatg	TACAAG	ACTAAT	GAGCGG	0
TCAGAA	0	0	accaacca	atgcttct	TACATC	GAGTA	GAGCTC	0
TCAGGA	0	0	accaagaa	atgcttgc	TACATG	TCTTAA	GAGGCT	0
TCATCA	0	0	accaagga	atggaaca	TACCAG	TTGGTT	GAGTGA	0
TCGTCG	0	0	accacaag	atggatga	TACCTC	ATATTT	GATCAC	0
TCTTCA	0	0	accaccag	atggcaaa	TACCTG	AGAGCCA	GATCCA	0
TGAAAC	0	0	accacgaa	atggccaa	TACTAC	TCTTT	GATGAC	0
TGAAAG	0	0	accacgag	atggctaa	TACTGC	AGTTTT	GATTGA	0
TGAAGA	0	0	accactga	atggctta	TACTGG	GTATTT	GCAAAC	0
TGAAGC	0	0	accagaac	atggggtc	TACTTC	TCAGA	GCAAAG	0
TGAAGG	0	0	accagaag	atgggtat	TATGAA	TAAGT	GCAACT	0
TGAAGT	0	0	accagacc	atgggtta	TATGAC	AAGCA	GCAGAG	0
TGACTG	0	0	accagaga	atggtaaa	TATGAG	TTCACAG	GCAGAT	0
TGAGAA	0	0	accagcaa	atggtaga	TATGCA	AGTAA	GCAGCA	0
TGATGA	0	0	accagcag	atggtggg	TATGGA	TCTGG	GCAGCC	0
TGCAAC	0	0	accagcca	atggttaa	TATGGG	AGCTTT	GCAGTG	0
TGGAAA	0	0	accagccc	atggttat	TATGTA	TGATTTG	GCCGAA	0
TGGAAC	0	0	accagcct	atggttta	TCAGAA	TTTTGC	GCCTGC	0
TGGAAG	0	0	accagctg	atggtttc	TCAGAT	TAGAAA	GCGAAA	0
TGGAAT	0	0	accaggag	atggtttg	TCAGGA	GTGAG	GCGAAG	0
TGGATC	0	0	accagtag	atgtaaaa	TCCAAA	TTCTGT	GCGGAC	0
TGTGGA	0	0	accagtca	atgtaaag	TCCAAG	GTAAG	GCTGAT	0
TTCAGA	0	0	accagtcc	atgtaaat	TCCAGG	ATGAAA	GCTGCA	0
TTCGAA	0	0	accatcag	atgtaatg	TCCATC	AGAAAA	GCTGCT	0
TTGAAG	0	0	accatccg	atgtaatt	TCCATG	TGAGC	GCTGTA	0
TTGCGA	0	0	accatcga	atgtacat	TCCTGG	TGGCTT	GCTGTC	0
TTGGAA	0	0	accatctg	atgtatat	TCCTGT	TTAATCT	GCTTCA	0
TTGGAT	0	0	acccagac	atgtatgt	TCCTTC	AATTAT	GGAAAT	0
TTTGGA	0	0	acccagtg	atgtattt	TCTGCA	TGGAAAT	GGAACG	0
0	0	0	accccctg	atgtcagg	TCTGGA	CCACAG	GGAAGC	0
0	0	0	accccgtg	atgtcagt	TCTGGG	AAATGA	GGACAA	0
0	0	0	acccgaag	atgtcatg	TCTGGT	GCAAGT	GGACAT	0
0	0	0	acccgagt	atgtcatt	TCTGTC	GTAAAA	GGACTA	0
0	0	0	acccggag	atgtctaa	TCTGTG	GTCTG	GGACTT	0
0	0	0	accctctg	atgtctct	TCTGTT	AAATGT	GGAGCC	0
0	0	0	accctgat	atgtctta	TGCAAA	TGCAT	GGAGGC	0
0	0	0	accctgcc	atgtgtat	TGCTGG	GAGAAA	GGATGA	0
0	0	0	accgaagg	atgtgtcg	TGTGAA	TTAGA	GGCAGA	0
0	0	0	accgactg	atgtgtgt	TGTGAC	TTTATAA	GGGAAC	0
0	0	0	accgaggc	atgtgttt	TGTGAG	GTTTT	GGGACC	0
0	0	0	accggaag	atgttaaa	TGTGCA	GCTTGGC	GGTGAC	0
0	0	0	accggagg	atgttaac	TGTGCC	TAAGC	GTAGAC	0
0	0	0	acctcccg	atgttata	TGTGCT	GTATG	GTCGAG	0
0	0	0	acctcgaa	atgttatc	TGTGGC	AAATT	GTGAAA	0
0	0	0	acctctga	atgttatg	TGTGTC	GTAAT	GTGACG	0
0	0	0	acctctgc	atgttatt	TGTGTG	TTCTCT	GTGAGC	0
0	0	0	acctgaag	atgtttaa	TTAAAT	TGAGAA	GTGGAT	0
0	0	0	acctgacc	atgtttat	TTAATT	TTAGTT	GTTGAA	0
0	0	0	acctgagg	atgttttc	TTAGAA	TAAGG	TAAACC	0
0	0	0	acctgatc	atgttttt	TTCAAC	TGTTTAA	TAAGAA	0
0	0	0	acctgcag	attaacta	TTCAAG	GTCAGT	TAAGAC	0
0	0	0	acctgcca	attaatgt	TTCATC	AGAATT	TACGAA	0
0	0	0	acctgccc	attagatg	TTCATG	TAAATG	TACTGA	0
0	0	0	acctgcct	attagggg	TTCCAG	AATTCA	TAGAAA	0
0	0	0	acctgcgt	attagtag	TTCCGG	TCCTTT	TAGAAC	0
0	0	0	acctgctg	attagtat	TTCCTG	TAAGA	TAGACA	0
0	0	0	acctgctt	attagttt	TTCTCC	AAATCA	TAGAGA	0
0	0	0	acctggaa	attatgct	TTCTGC	TAATTTG	TAGCAG	0
0	0	0	acctggag	attatgtt	TTCTGG	GAAATA	TAGCTG	0
0	0	0	acctgtgc	attatttg	TTCTTC	TGGTTT	TAGGAA	0
0	0	0	accttcaa	attatttt	TTGGAT	TGTTAA	TAGGAC	0
0	0	0	accttcag	attcatta	TTGGCA	TGTCT	TAGGAG	0
0	0	0	accttgaa	attgccta	TTGGTT	GTTGGT	TCAAAG	0
0	0	0	accttgag	attgttta	TTTGAA	TGAATT	TCAACA	0
0	0	0	acgaagac	atttaaaa	TTTGAC	AATTTA	TCAAGC	0
0	0	0	acgaagga	atttaata	TTTGAG	TATGT	TCAGAC	0
0	0	0	acgaccag	atttaatt	TTTGAT	GCATTT	TCAGCG	0
0	0	0	acgacctg	atttacta	TTTGCA	AAGTA	TCCAAG	0
0	0	0	acgactgc	atttactt	TTTGCC	GCTTCT	TCCAGC	0
0	0	0	acgagaaa	atttagtt	TTTGCT	TTCTAA	TCCGAC	0
0	0	0	acgagaag	atttatat	TTTGGA	GTTTCT	TCCGGA	0
0	0	0	acgagaca	atttattt	TTTGGG	AGATTT	TCCTGG	0
0	0	0	acgagacc	atttcatt	TTTGGT	GAAAAT	TCGAAC	0
0	0	0	acgagcac	atttcctt	TTTGTA	TGCTAA	TCGAAT	0
0	0	0	acgagcag	atttctat	TTTGTG	AAGCT	TCGACC	0
0	0	0	acgaggag	atttcttt	TTTGTT	CTTTGCT	TCGACG	0
0	0	0	acgagtca	atttgctt	0	TCTGA	TCGACT	0
0	0	0	acgatcag	atttgtgt	0	TTTCTC	TCGAGA	0
0	0	0	acgattca	atttgttt	0	TTTATTC	TCGGAA	0
0	0	0	acgattcc	attttaaa	0	TTTGCC	TCTGAG	0
0	0	0	acgccgtg	attttagt	0	TGAAAG	TCTGCC	0
0	0	0	acggacct	attttata	0	TGTTCT	TCTGGC	0
0	0	0	acggagaa	attttatg	0	CTTTT	TGAAAA	0
0	0	0	acggagga	attttatt	0	TTTTCTG	TGAACG	0
0	0	0	acggatta	attttctt	0	TGAGT	TGAACT	0
0	0	0	acggctga	attttgtt	0	TTGCAG	TGAATC	0
0	0	0	acggtgga	atttttat	0	TAATA	TGACAA	0
0	0	0	acgtcgtg	atttttgt	0	AGTAT	TGACCC	0
0	0	0	acgtctgc	atttttta	0	ATTCT	TGACCG	0
0	0	0	acgtctgg	attttttt	0	TGCCTTT	TGAGAC	0
0	0	0	acgtgacc	caaaaaat	0	ATCAAA	TGAGCT	0
0	0	0	acgtgaga	caaaaatg	0	GAGTG	TGATCA	0
0	0	0	acgtggag	caaaatga	0	TAGGT	TGCAAG	0
0	0	0	acgttgag	caaatggt	0	CTTTA	TGCGGC	0
0	0	0	actacaac	caaatgtt	0	TTTAG	TGGAGT	0
0	0	0	actacgac	caataact	0	TGATTTT	TGTCGA	0
0	0	0	actacgtg	caatagtt	0	TTTCAT	TGTGAA	0
0	0	0	actactac	cacacaaa	0	CTTTCA	TTCAAC	0
0	0	0	actagacc	cacacaca	0	AAGAT	TTCGAC	0
0	0	0	actagcag	cacacacg	0	TGCTT	TTGAAA	0
0	0	0	actcaacc	cacacact	0	GTGGGT	TTGACG	0
0	0	0	actccacg	cacacata	0	GTAAAG	TTGAGA	0
0	0	0	actcgaag	cacacatg	0	CTGAA	TTGAGC	0
0	0	0	actctgat	cacacgca	0	TCTGC	TTGCAG	0
0	0	0	actctgcc	cacactca	0	CTAAA	0	0
0	0	0	actctgct	cacagaca	0	0	0	0
0	0	0	actgaaca	cacataaa	0	0	0	0
0	0	0	actgaacc	cacataca	0	0	0	0
0	0	0	actgaaga	cacatggc	0	0	0	0
0	0	0	actgaagc	cacatggt	0	0	0	0
0	0	0	actgaagg	cacgcaca	0	0	0	0
0	0	0	actgaagt	cactatag	0	0	0	0
0	0	0	actgacca	cactcaca	0	0	0	0
0	0	0	actgacgt	cactctct	0	0	0	0
0	0	0	actgagca	caggcatg	0	0	0	0
0	0	0	actgagga	cataaatg	0	0	0	0
0	0	0	actgaggc	cataaatt	0	0	0	0
0	0	0	actgcaga	cataatgt	0	0	0	0
0	0	0	actgctct	catacaca	0	0	0	0
0	0	0	actgctgc	catacata	0	0	0	0
0	0	0	actggaaa	catacatg	0	0	0	0
0	0	0	actggaag	catataat	0	0	0	0
0	0	0	actggaca	catatagt	0	0	0	0
0	0	0	actggacc	catatata	0	0	0	0
0	0	0	actggacg	catatatt	0	0	0	0
0	0	0	actggagg	catgcaat	0	0	0	0
0	0	0	actgggag	catgcata	0	0	0	0
0	0	0	actggtcg	catgcatg	0	0	0	0
0	0	0	acttcaag	catggcaa	0	0	0	0
0	0	0	acttcacg	catgtaat	0	0	0	0
0	0	0	acttcact	catgtgtt	0	0	0	0
0	0	0	acttcagc	catgttat	0	0	0	0
0	0	0	acttcatc	cattaatt	0	0	0	0
0	0	0	acttcctg	catttttt	0	0	0	0
0	0	0	acttcgaa	ccatacat	0	0	0	0
0	0	0	acttcgtg	ccatgcac	0	0	0	0
0	0	0	acttgaag	cccaaaag	0	0	0	0
0	0	0	acttgacc	cccaaatg	0	0	0	0
0	0	0	agaaacca	cctaggta	0	0	0	0
0	0	0	agaaaccg	cctattta	0	0	0	0
0	0	0	agaaacct	ccttttta	0	0	0	0
0	0	0	agaaacga	cgaaatgg	0	0	0	0
0	0	0	agaaacta	cgcaaatg	0	0	0	0
0	0	0	agaaactg	cgcacatg	0	0	0	0
0	0	0	agaaagaa	cgcccaaa	0	0	0	0
0	0	0	agaaagca	cgctatga	0	0	0	0
0	0	0	agaaatca	cggtcatg	0	0	0	0
0	0	0	agaacagc	cgttcttt	0	0	0	0
0	0	0	agaaccag	cgttttta	0	0	0	0
0	0	0	agaaccca	ctaaaatg	0	0	0	0
0	0	0	agaacccc	ctaacaat	0	0	0	0
0	0	0	agaaccct	ctaactat	0	0	0	0
0	0	0	agaacctg	ctaagatg	0	0	0	0
0	0	0	agaagaaa	ctaaggta	0	0	0	0
0	0	0	agaagaac	ctaatgta	0	0	0	0
0	0	0	agaagaag	ctaattta	0	0	0	0
0	0	0	agaagaat	ctacatgt	0	0	0	0
0	0	0	agaagaca	ctagggta	0	0	0	0
0	0	0	agaagacc	ctatatat	0	0	0	0
0	0	0	agaagacg	ctatctct	0	0	0	0
0	0	0	agaagact	ctatgcat	0	0	0	0
0	0	0	agaagaga	ctatttaa	0	0	0	0
0	0	0	agaagagc	ctatttat	0	0	0	0
0	0	0	agaagagg	ctatttta	0	0	0	0
0	0	0	agaagagt	ctcaaatg	0	0	0	0
0	0	0	agaagata	ctcatgta	0	0	0	0
0	0	0	agaagatc	cttacact	0	0	0	0
0	0	0	agaagatg	cttatatg	0	0	0	0
0	0	0	agaagatt	cttatatt	0	0	0	0
0	0	0	agaagcaa	cttatgct	0	0	0	0
0	0	0	agaagcac	cttatgta	0	0	0	0
0	0	0	agaagcag	cttattta	0	0	0	0
0	0	0	agaagccc	cttcttta	0	0	0	0
0	0	0	agaagccg	cttgtaat	0	0	0	0
0	0	0	agaagcgg	cttgtact	0	0	0	0
0	0	0	agaagcta	ctttccat	0	0	0	0
0	0	0	agaagctc	ctttcctt	0	0	0	0
0	0	0	agaagctg	ctttctct	0	0	0	0
0	0	0	agaagctt	ctttctta	0	0	0	0
0	0	0	agaaggaa	ctttcttt	0	0	0	0
0	0	0	agaaggac	cttttctt	0	0	0	0
0	0	0	agaaggag	ctttttat	0	0	0	0
0	0	0	agaaggca	ctttttct	0	0	0	0
0	0	0	agaagtac	cttttttc	0	0	0	0
0	0	0	agaagtag	cttttttt	0	0	0	0
0	0	0	agaagtct	gaaatggc	0	0	0	0
0	0	0	agaagttg	gaaatggg	0	0	0	0
0	0	0	agaatctg	gaaatggt	0	0	0	0
0	0	0	agaattcc	gaaatgta	0	0	0	0
0	0	0	agacaact	gaaatgtc	0	0	0	0
0	0	0	agacacca	gaatggta	0	0	0	0
0	0	0	agacaccc	gaatggtt	0	0	0	0
0	0	0	agacagga	gaatgtat	0	0	0	0
0	0	0	agacatca	gacagata	0	0	0	0
0	0	0	agacatcg	gagatggt	0	0	0	0
0	0	0	agacatct	gatagggg	0	0	0	0
0	0	0	agacattc	gatatata	0	0	0	0
0	0	0	agacattg	gatatatg	0	0	0	0
0	0	0	agaccaac	gatatgtc	0	0	0	0
0	0	0	agaccagc	gatgcatg	0	0	0	0
0	0	0	agaccatc	gatggatg	0	0	0	0
0	0	0	agaccctg	gatggggg	0	0	0	0
0	0	0	agacctcc	gatgtaaa	0	0	0	0
0	0	0	agacctga	gattaggc	0	0	0	0
0	0	0	agacctgc	gcaggggt	0	0	0	0
0	0	0	agaccttg	gcataaat	0	0	0	0
0	0	0	agacgaac	gcatatat	0	0	0	0
0	0	0	agacgatc	gccatgcg	0	0	0	0
0	0	0	agacgctc	gcgcggtg	0	0	0	0
0	0	0	agacgttg	gctttggg	0	0	0	0
0	0	0	agacttct	gcttttta	0	0	0	0
0	0	0	agagaaac	ggcatata	0	0	0	0
0	0	0	agagaaca	ggcatggg	0	0	0	0
0	0	0	agagaaga	ggcgcggt	0	0	0	0
0	0	0	agagaagc	ggcttttt	0	0	0	0
0	0	0	agagacca	gggaggcc	0	0	0	0
0	0	0	agagacct	gggagggc	0	0	0	0
0	0	0	agagagaa	gggagggt	0	0	0	0
0	0	0	agagagct	gggatggg	0	0	0	0
0	0	0	agagagga	gggcatga	0	0	0	0
0	0	0	agagatcc	gggctata	0	0	0	0
0	0	0	agagatct	gggctatg	0	0	0	0
0	0	0	agagcatc	gggcttta	0	0	0	0
0	0	0	agaggaaa	ggggatgg	0	0	0	0
0	0	0	agaggaac	ggggcatg	0	0	0	0
0	0	0	agaggaag	ggggggcc	0	0	0	0
0	0	0	agaggacc	gggggggt	0	0	0	0
0	0	0	agaggagc	ggggtagg	0	0	0	0
0	0	0	agaggagg	ggggtagt	0	0	0	0
0	0	0	agaggatc	gggtaggc	0	0	0	0
0	0	0	agaggcac	gggtaggg	0	0	0	0
0	0	0	agaggccc	gggtatga	0	0	0	0
0	0	0	agatacca	gggtatgt	0	0	0	0
0	0	0	agatcagc	gggtctcg	0	0	0	0
0	0	0	agatcatc	gggttggg	0	0	0	0
0	0	0	agatcctg	ggtaaatg	0	0	0	0
0	0	0	agcaacgc	ggtagggt	0	0	0	0
0	0	0	agcaactg	ggtatagg	0	0	0	0
0	0	0	agcaagaa	ggtatata	0	0	0	0
0	0	0	agcaagac	ggtatgta	0	0	0	0
0	0	0	agcaagca	ggtcatgg	0	0	0	0
0	0	0	agcaagct	ggtttatg	0	0	0	0
0	0	0	agcaagga	gtaaatga	0	0	0	0
0	0	0	agcaagtg	gtaatgta	0	0	0	0
0	0	0	agcacaga	gtacattt	0	0	0	0
0	0	0	agcacctg	gtactaac	0	0	0	0
0	0	0	agcacgaa	gtagggat	0	0	0	0
0	0	0	agcacgga	gtagggga	0	0	0	0
0	0	0	agcactga	gtaggggt	0	0	0	0
0	0	0	agcactgc	gtagttat	0	0	0	0
0	0	0	agcactgg	gtataaac	0	0	0	0
0	0	0	agcagaaa	gtataaat	0	0	0	0
0	0	0	agcagaac	gtatacct	0	0	0	0
0	0	0	agcagaag	gtatatat	0	0	0	0
0	0	0	agcagctc	gtatattt	0	0	0	0
0	0	0	agcagctg	gtatgtat	0	0	0	0
0	0	0	agcaggaa	gtatgtta	0	0	0	0
0	0	0	agcaggag	gtatgttt	0	0	0	0
0	0	0	agcagtga	gtattatt	0	0	0	0
0	0	0	agcagttg	gtattgtt	0	0	0	0
0	0	0	agcatcac	gtatttat	0	0	0	0
0	0	0	agcatctg	gtatttta	0	0	0	0
0	0	0	agcattga	gtcttgta	0	0	0	0
0	0	0	agccaaca	gtgagatg	0	0	0	0
0	0	0	agccagca	gtgaggcc	0	0	0	0
0	0	0	agccattg	gtgcgttg	0	0	0	0
0	0	0	agccgaga	gttagatt	0	0	0	0
0	0	0	agccggaa	gttaggcc	0	0	0	0
0	0	0	agccggtt	gttatccc	0	0	0	0
0	0	0	agcctcga	gttatgta	0	0	0	0
0	0	0	agcctgga	gttatgtt	0	0	0	0
0	0	0	agcgagga	gttattta	0	0	0	0
0	0	0	agcgcata	gttatttt	0	0	0	0
0	0	0	agcggaag	gttcatgc	0	0	0	0
0	0	0	agcggagt	gttcatta	0	0	0	0
0	0	0	agctcaag	gttcttta	0	0	0	0
0	0	0	agctcatc	gtttaaag	0	0	0	0
0	0	0	agctcgaa	gtttatgt	0	0	0	0
0	0	0	agctctgc	gtttattt	0	0	0	0
0	0	0	agctgaac	gtttcatt	0	0	0	0
0	0	0	agctgaag	gtttcgtt	0	0	0	0
0	0	0	agctgaca	gtttctct	0	0	0	0
0	0	0	agctgacc	gtttctgt	0	0	0	0
0	0	0	agctgcct	gtttcttg	0	0	0	0
0	0	0	agctggaa	gtttcttt	0	0	0	0
0	0	0	agctggag	gtttggct	0	0	0	0
0	0	0	agctggtg	gtttgttt	0	0	0	0
0	0	0	agctgttc	gttttatt	0	0	0	0
0	0	0	agctgttg	gttttctt	0	0	0	0
0	0	0	aggaaaag	gtttttat	0	0	0	0
0	0	0	aggaacac	gtttttgt	0	0	0	0
0	0	0	aggaacag	gttttttt	0	0	0	0
0	0	0	aggaacct	taaaaaaa	0	0	0	0
0	0	0	aggaacga	taaaaata	0	0	0	0
0	0	0	aggaactg	taaaacta	0	0	0	0
0	0	0	aggaagaa	taaaagta	0	0	0	0
0	0	0	aggaagac	taaaatat	0	0	0	0
0	0	0	aggaagag	taaaatgc	0	0	0	0
0	0	0	aggaagat	taaaatgg	0	0	0	0
0	0	0	aggaagga	taaaatgt	0	0	0	0
0	0	0	aggaagtg	taaaggta	0	0	0	0
0	0	0	aggaatcc	taaagtat	0	0	0	0
0	0	0	aggaccac	taaatagc	0	0	0	0
0	0	0	aggaccag	taaatata	0	0	0	0
0	0	0	aggacccc	taaatatc	0	0	0	0
0	0	0	aggaccct	taaatgac	0	0	0	0
0	0	0	aggaccgg	taaatgcc	0	0	0	0
0	0	0	aggacctg	taaatgtt	0	0	0	0
0	0	0	aggacctt	taaatttt	0	0	0	0
0	0	0	aggactcc	taacagta	0	0	0	0
0	0	0	aggactgc	taacctta	0	0	0	0
0	0	0	aggactgg	taacgtta	0	0	0	0
0	0	0	aggacttc	taactatt	0	0	0	0
0	0	0	aggagaaa	taagctta	0	0	0	0
0	0	0	aggagaac	taaggtat	0	0	0	0
0	0	0	aggagaag	taaggtta	0	0	0	0
0	0	0	aggagaat	taagtata	0	0	0	0
0	0	0	aggagaca	taagtatg	0	0	0	0
0	0	0	aggagacc	taataaaa	0	0	0	0
0	0	0	aggagacg	taataatg	0	0	0	0
0	0	0	aggagact	taatacta	0	0	0	0
0	0	0	aggagata	taatagtt	0	0	0	0
0	0	0	aggagatc	taatatat	0	0	0	0
0	0	0	aggagcaa	taatgaat	0	0	0	0
0	0	0	aggagcac	taatgaca	0	0	0	0
0	0	0	aggagccc	taatgagc	0	0	0	0
0	0	0	aggagctc	taatgata	0	0	0	0
0	0	0	aggagctg	taatgcaa	0	0	0	0
0	0	0	aggaggaa	taatgctt	0	0	0	0
0	0	0	aggaggac	taatggtt	0	0	0	0
0	0	0	aggaggag	taatgtaa	0	0	0	0
0	0	0	aggaggcc	taatgtat	0	0	0	0
0	0	0	aggagtac	taatgtca	0	0	0	0
0	0	0	aggagtag	taatgtgg	0	0	0	0
0	0	0	aggagtcc	taatgtgt	0	0	0	0
0	0	0	aggagttc	taatgtta	0	0	0	0
0	0	0	aggatcct	taatgttt	0	0	0	0
0	0	0	aggatctg	taatttat	0	0	0	0
0	0	0	aggattca	tacacaca	0	0	0	0
0	0	0	aggattcc	tacacata	0	0	0	0
0	0	0	aggattcg	tacatata	0	0	0	0
0	0	0	aggattgc	tacatgta	0	0	0	0
0	0	0	aggcctgc	tacattat	0	0	0	0
0	0	0	agggagaa	tacatttt	0	0	0	0
0	0	0	agggggaa	tacgcttt	0	0	0	0
0	0	0	aggtcctg	tactgttt	0	0	0	0
0	0	0	aggtcgaa	tacttacc	0	0	0	0
0	0	0	aggtgacc	tacttgta	0	0	0	0
0	0	0	aggtggag	tactttag	0	0	0	0
0	0	0	agtaagga	tagaaatg	0	0	0	0
0	0	0	agtacaac	tagatata	0	0	0	0
0	0	0	agtacctg	taggaatg	0	0	0	0
0	0	0	agtagaag	taggcatg	0	0	0	0
0	0	0	agtagacc	taggcttt	0	0	0	0
0	0	0	agtagcac	taggggag	0	0	0	0
0	0	0	agtaggaa	taggggta	0	0	0	0
0	0	0	agtaggag	tagggtag	0	0	0	0
0	0	0	agtcaacc	taggtata	0	0	0	0
0	0	0	agtcagca	taggtatt	0	0	0	0
0	0	0	agtcattg	tagtacta	0	0	0	0
0	0	0	agtcctgc	tagtattt	0	0	0	0
0	0	0	agtcgaca	tagtggtt	0	0	0	0
0	0	0	agtgaaca	tagtgtgc	0	0	0	0
0	0	0	agtgacca	tagtgttt	0	0	0	0
0	0	0	agtgacga	tagttata	0	0	0	0
0	0	0	agtgagga	tagttatt	0	0	0	0
0	0	0	agtgcagc	tagttttc	0	0	0	0
0	0	0	agtggaac	tataaaac	0	0	0	0
0	0	0	agtggaca	tataaaat	0	0	0	0
0	0	0	agtggacc	tataaata	0	0	0	0
0	0	0	agtggagg	tataacta	0	0	0	0
0	0	0	agttcaac	tataatgc	0	0	0	0
0	0	0	agttcagc	tataatgt	0	0	0	0
0	0	0	agttcatc	tataatta	0	0	0	0
0	0	0	agttcctg	tataattt	0	0	0	0
0	0	0	ataaacca	tatacata	0	0	0	0
0	0	0	ataaagac	tatactag	0	0	0	0
0	0	0	ataacgac	tatactta	0	0	0	0
0	0	0	ataagaag	tatacttg	0	0	0	0
0	0	0	ataaggag	tatacttt	0	0	0	0
0	0	0	ataccgac	tatagata	0	0	0	0
0	0	0	atacgaac	tatagtat	0	0	0	0
0	0	0	atagaggc	tatagtca	0	0	0	0
0	0	0	atcaacga	tatagtgt	0	0	0	0
0	0	0	atcaagaa	tatagtta	0	0	0	0
0	0	0	atcaccga	tatagttg	0	0	0	0
0	0	0	atcacgga	tatagttt	0	0	0	0
0	0	0	atcagaag	tatataaa	0	0	0	0
0	0	0	atcagcaa	tatataca	0	0	0	0
0	0	0	atcagccc	tatatata	0	0	0	0
0	0	0	atcagcgt	tatatatg	0	0	0	0
0	0	0	atcagttc	tatatatt	0	0	0	0
0	0	0	atcatcca	tatatcta	0	0	0	0
0	0	0	atccacga	tatatctt	0	0	0	0
0	0	0	atccccgt	tatatgta	0	0	0	0
0	0	0	atccggat	tatatgtc	0	0	0	0
0	0	0	atccggga	tatatgtg	0	0	0	0
0	0	0	atcctgag	tatatgtt	0	0	0	0
0	0	0	atcctgat	tatattag	0	0	0	0
0	0	0	atcctgct	tatattat	0	0	0	0
0	0	0	atcctgga	tatattct	0	0	0	0
0	0	0	atcctggt	tatattgt	0	0	0	0
0	0	0	atcctgtg	tatattta	0	0	0	0
0	0	0	atcgactg	tatatttg	0	0	0	0
0	0	0	atcgagac	tatatttt	0	0	0	0
0	0	0	atcgagct	tatcttag	0	0	0	0
0	0	0	atcggagg	tatcttat	0	0	0	0
0	0	0	atcggtgc	tatctttt	0	0	0	0
0	0	0	atcggttg	tatgatat	0	0	0	0
0	0	0	atcgtcga	tatgcaat	0	0	0	0
0	0	0	atctacag	tatgcata	0	0	0	0
0	0	0	atctcaac	tatgcatt	0	0	0	0
0	0	0	atctcaag	tatgctat	0	0	0	0
0	0	0	atctccac	tatgcttg	0	0	0	0
0	0	0	atctcgag	tatggtat	0	0	0	0
0	0	0	atctgaac	tatggttt	0	0	0	0
0	0	0	atctgaag	tatgtaac	0	0	0	0
0	0	0	atctgacc	tatgtaat	0	0	0	0
0	0	0	atctgagc	tatgtata	0	0	0	0
0	0	0	atctgcag	tatgtatg	0	0	0	0
0	0	0	atctgccg	tatgtatt	0	0	0	0
0	0	0	atctgctc	tatgtcta	0	0	0	0
0	0	0	atctggac	tatgtctc	0	0	0	0
0	0	0	atctggag	tatgtctt	0	0	0	0
0	0	0	atctggcg	tatgttag	0	0	0	0
0	0	0	atctgtgc	tatgttat	0	0	0	0
0	0	0	atgaagaa	tatgttca	0	0	0	0
0	0	0	atgaagac	tatgttct	0	0	0	0
0	0	0	atgaagat	tatgttta	0	0	0	0
0	0	0	atggactg	tatgtttc	0	0	0	0
0	0	0	attacaac	tatgtttt	0	0	0	0
0	0	0	attcagcc	tattaata	0	0	0	0
0	0	0	attccaac	tattaatg	0	0	0	0
0	0	0	attccaga	tattaatt	0	0	0	0
0	0	0	attcctgc	tattagta	0	0	0	0
0	0	0	attcgaga	tattatag	0	0	0	0
0	0	0	attgaaga	tattatgt	0	0	0	0
0	0	0	attgacga	tattattt	0	0	0	0
0	0	0	attgaggc	tattcata	0	0	0	0
0	0	0	attgcggc	tattctat	0	0	0	0
0	0	0	attgctgc	tattcttt	0	0	0	0
0	0	0	attggaga	tattgtag	0	0	0	0
0	0	0	atttcgtc	tattgtat	0	0	0	0
0	0	0	atttgcga	tattgtcc	0	0	0	0
0	0	0	caaacacc	tattgtgt	0	0	0	0
0	0	0	caaacaga	tattgttt	0	0	0	0
0	0	0	caaactgg	tatttaaa	0	0	0	0
0	0	0	caaagaag	tatttaac	0	0	0	0
0	0	0	caaagaga	tatttaat	0	0	0	0
0	0	0	caacaaag	tatttaca	0	0	0	0
0	0	0	caacaacc	tatttact	0	0	0	0
0	0	0	caaccagc	tatttagt	0	0	0	0
0	0	0	caacccag	tatttata	0	0	0	0
0	0	0	caacgaga	tatttatg	0	0	0	0
0	0	0	caacggat	tatttatt	0	0	0	0
0	0	0	caacggtg	tatttctt	0	0	0	0
0	0	0	caacgtga	tatttgta	0	0	0	0
0	0	0	caacgttg	tatttgtt	0	0	0	0
0	0	0	caactcag	tattttaa	0	0	0	0
0	0	0	caactctg	tattttag	0	0	0	0
0	0	0	caactgga	tattttat	0	0	0	0
0	0	0	caacttca	tattttct	0	0	0	0
0	0	0	caactttg	tattttgt	0	0	0	0
0	0	0	caagaaac	tattttta	0	0	0	0
0	0	0	caagaaca	tatttttc	0	0	0	0
0	0	0	caagaacc	tatttttg	0	0	0	0
0	0	0	caagaaga	tatttttt	0	0	0	0
0	0	0	caagaagc	tcataaat	0	0	0	0
0	0	0	caagaatc	tcatattt	0	0	0	0
0	0	0	caagacca	tcatgcat	0	0	0	0
0	0	0	caagacct	tcatgtgt	0	0	0	0
0	0	0	caagcaga	tcattttt	0	0	0	0
0	0	0	caagccgg	tccatgca	0	0	0	0
0	0	0	caagctga	tccattac	0	0	0	0
0	0	0	caaggacc	tccatttt	0	0	0	0
0	0	0	caaggaga	tccctttt	0	0	0	0
0	0	0	caaggagg	tccgtttt	0	0	0	0
0	0	0	caagtgga	tcctattt	0	0	0	0
0	0	0	cacaacgt	tcgctcat	0	0	0	0
0	0	0	cacaactt	tcgttctt	0	0	0	0
0	0	0	cacagaag	tcgttttt	0	0	0	0
0	0	0	cacagacg	tctaatat	0	0	0	0
0	0	0	caccaaca	tctaatgt	0	0	0	0
0	0	0	caccaaga	tctaatta	0	0	0	0
0	0	0	caccaagg	tctagtat	0	0	0	0
0	0	0	caccacgg	tctatttt	0	0	0	0
0	0	0	caccagca	tctcattt	0	0	0	0
0	0	0	caccgaag	tctccatg	0	0	0	0
0	0	0	cacctctg	tctctaaa	0	0	0	0
0	0	0	cacctgcc	tctctaag	0	0	0	0
0	0	0	cacctgct	tctctaat	0	0	0	0
0	0	0	cacctgga	tctctatt	0	0	0	0
0	0	0	caccttcc	tctcttaa	0	0	0	0
0	0	0	cacgattg	tctcttta	0	0	0	0
0	0	0	cacggacc	tctctttt	0	0	0	0
0	0	0	cactgaac	tctgttat	0	0	0	0
0	0	0	cactgaag	tctgttta	0	0	0	0
0	0	0	cactgacg	tctgtttt	0	0	0	0
0	0	0	cactgagg	tcttaatg	0	0	0	0
0	0	0	cactgctg	tcttatgt	0	0	0	0
0	0	0	cactggat	tcttgttt	0	0	0	0
0	0	0	cagaaaca	tctttaaa	0	0	0	0
0	0	0	cagaaatc	tctttaac	0	0	0	0
0	0	0	cagaacga	tctttata	0	0	0	0
0	0	0	cagaactc	tctttctt	0	0	0	0
0	0	0	cagaagaa	tctttttc	0	0	0	0
0	0	0	cagaagac	tctttttt	0	0	0	0
0	0	0	cagaagag	tgaaatgg	0	0	0	0
0	0	0	cagaagat	tgaatggt	0	0	0	0
0	0	0	cagaagct	tgatatgt	0	0	0	0
0	0	0	cagaagga	tgcataaa	0	0	0	0
0	0	0	cagaaggc	tgcgatgg	0	0	0	0
0	0	0	cagaaggg	tgcttata	0	0	0	0
0	0	0	cagaagta	tggccaaa	0	0	0	0
0	0	0	cagaagtc	tggccatg	0	0	0	0
0	0	0	cagaagtt	tggggatg	0	0	0	0
0	0	0	cagacatc	tggtaaaa	0	0	0	0
0	0	0	cagacttc	tggtagag	0	0	0	0
0	0	0	cagagaaa	tggtaggg	0	0	0	0
0	0	0	cagagaag	tggttatg	0	0	0	0
0	0	0	cagagacg	tggttctc	0	0	0	0
0	0	0	cagagagg	tggtttag	0	0	0	0
0	0	0	cagaggac	tgtaaaaa	0	0	0	0
0	0	0	cagaggag	tgtaatgt	0	0	0	0
0	0	0	cagcaaag	tgtaattc	0	0	0	0
0	0	0	cagcacag	tgtacatt	0	0	0	0
0	0	0	cagcactg	tgtacgta	0	0	0	0
0	0	0	cagcatcg	tgtacttt	0	0	0	0
0	0	0	cagcattg	tgtagttt	0	0	0	0
0	0	0	cagccctg	tgtataaa	0	0	0	0
0	0	0	cagccgtg	tgtatata	0	0	0	0
0	0	0	cagcctag	tgtatatt	0	0	0	0
0	0	0	cagccttg	tgtatctt	0	0	0	0
0	0	0	cagcgttg	tgtatgca	0	0	0	0
0	0	0	cagctcag	tgtatgct	0	0	0	0
0	0	0	cagctctg	tgtatgta	0	0	0	0
0	0	0	cagctgaa	tgtatgtt	0	0	0	0
0	0	0	cagctgag	tgtattgt	0	0	0	0
0	0	0	cagctgat	tgtattta	0	0	0	0
0	0	0	cagctgga	tgtatttg	0	0	0	0
0	0	0	cagctggt	tgtatttt	0	0	0	0
0	0	0	cagctgtg	tgtcatgt	0	0	0	0
0	0	0	cagctgtt	tgtctaaa	0	0	0	0
0	0	0	caggaact	tgtcttag	0	0	0	0
0	0	0	caggactc	tgtcttgt	0	0	0	0
0	0	0	caggactg	tgtctttt	0	0	0	0
0	0	0	caggagga	tgtgatgg	0	0	0	0
0	0	0	caggagtc	tgtgtatg	0	0	0	0
0	0	0	caggattc	tgtgtgtt	0	0	0	0
0	0	0	caggctca	tgtgttta	0	0	0	0
0	0	0	cagtcaac	tgtgtttt	0	0	0	0
0	0	0	cagtccaa	tgttaagt	0	0	0	0
0	0	0	cagtccag	tgttaatt	0	0	0	0
0	0	0	cagtcgaa	tgttagat	0	0	0	0
0	0	0	cagtgaag	tgttatgt	0	0	0	0
0	0	0	cagtgaga	tgttattt	0	0	0	0
0	0	0	cagttcct	tgttcacg	0	0	0	0
0	0	0	catagaag	tgttcata	0	0	0	0
0	0	0	catagagg	tgttcatg	0	0	0	0
0	0	0	catcagat	tgtttaaa	0	0	0	0
0	0	0	catcagct	tgtttaag	0	0	0	0
0	0	0	catcatca	tgtttaat	0	0	0	0
0	0	0	catccgct	tgtttata	0	0	0	0
0	0	0	catccggc	tgtttatg	0	0	0	0
0	0	0	catcgaaa	tgtttatt	0	0	0	0
0	0	0	catcgaag	tgtttctt	0	0	0	0
0	0	0	catcgagc	tgtttgct	0	0	0	0
0	0	0	catcgtct	tgtttgtg	0	0	0	0
0	0	0	catctagc	tgtttgtt	0	0	0	0
0	0	0	catctgaa	tgttttat	0	0	0	0
0	0	0	catctgac	tgtttttg	0	0	0	0
0	0	0	catctgcc	tgtttttt	0	0	0	0
0	0	0	catctgct	ttaaaaaa	0	0	0	0
0	0	0	catctgga	ttaaaaat	0	0	0	0
0	0	0	cattgaag	ttaaaata	0	0	0	0
0	0	0	cattgacg	ttaaaatg	0	0	0	0
0	0	0	cattgaga	ttaaaatt	0	0	0	0
0	0	0	cattgagc	ttaaatga	0	0	0	0
0	0	0	cattgagg	ttaacaat	0	0	0	0
0	0	0	cattgcgg	ttaacact	0	0	0	0
0	0	0	cattggag	ttaacata	0	0	0	0
0	0	0	ccaaagac	ttaactaa	0	0	0	0
0	0	0	ccaacacc	ttaactat	0	0	0	0
0	0	0	ccaaccag	ttaagtat	0	0	0	0
0	0	0	ccaaccca	ttaataaa	0	0	0	0
0	0	0	ccaagacc	ttaataat	0	0	0	0
0	0	0	ccaaggac	ttaatact	0	0	0	0
0	0	0	ccaaggag	ttaataga	0	0	0	0
0	0	0	ccacaacg	ttaatatg	0	0	0	0
0	0	0	ccacaact	ttaatatt	0	0	0	0
0	0	0	ccacaaga	ttaattaa	0	0	0	0
0	0	0	ccacagaa	ttaatttg	0	0	0	0
0	0	0	ccaccaac	ttacaata	0	0	0	0
0	0	0	ccacccag	ttacactt	0	0	0	0
0	0	0	ccacctgc	ttacccta	0	0	0	0
0	0	0	ccacggat	ttacttgt	0	0	0	0
0	0	0	ccactcag	ttaggcat	0	0	0	0
0	0	0	ccactgga	ttaggcca	0	0	0	0
0	0	0	ccagaaga	ttaggtca	0	0	0	0
0	0	0	ccagaagg	ttagtact	0	0	0	0
0	0	0	ccagaagt	ttagtagt	0	0	0	0
0	0	0	ccagacca	ttagtata	0	0	0	0
0	0	0	ccagacct	ttataaat	0	0	0	0
0	0	0	ccagagat	ttataata	0	0	0	0
0	0	0	ccagagga	ttataatt	0	0	0	0
0	0	0	ccagcaga	ttatacat	0	0	0	0
0	0	0	ccagcagg	ttatacta	0	0	0	0
0	0	0	ccagcagt	ttatactt	0	0	0	0
0	0	0	ccagccaa	ttatagtt	0	0	0	0
0	0	0	ccagccca	ttatatat	0	0	0	0
0	0	0	ccagccga	ttatatct	0	0	0	0
0	0	0	ccagctga	ttatatgt	0	0	0	0
0	0	0	ccagctgg	ttatatta	0	0	0	0
0	0	0	ccagctgt	ttatattg	0	0	0	0
0	0	0	ccagtcca	ttatattt	0	0	0	0
0	0	0	ccagtcct	ttatccct	0	0	0	0
0	0	0	ccagtgga	ttatgata	0	0	0	0
0	0	0	ccagttca	ttatgcta	0	0	0	0
0	0	0	ccatcagc	ttatgctt	0	0	0	0
0	0	0	cccagaag	ttatgtaa	0	0	0	0
0	0	0	cccagcca	ttatgtat	0	0	0	0
0	0	0	cccagtaa	ttatgtct	0	0	0	0
0	0	0	cccagtga	ttatgtta	0	0	0	0
0	0	0	ccccctgt	ttatgttg	0	0	0	0
0	0	0	ccccgtgt	ttatgttt	0	0	0	0
0	0	0	cccctgaa	ttattaaa	0	0	0	0
0	0	0	cccctgga	ttattaat	0	0	0	0
0	0	0	cccggact	ttattata	0	0	0	0
0	0	0	cccgtcaa	ttattatg	0	0	0	0
0	0	0	cccgtgga	ttattatt	0	0	0	0
0	0	0	ccctgaac	ttattctt	0	0	0	0
0	0	0	ccctgaag	ttatttaa	0	0	0	0
0	0	0	ccctgaat	ttatttac	0	0	0	0
0	0	0	ccctgacg	ttatttag	0	0	0	0
0	0	0	ccctgact	ttatttat	0	0	0	0
0	0	0	ccctgcct	ttatttcg	0	0	0	0
0	0	0	ccctgctc	ttatttct	0	0	0	0
0	0	0	ccctggag	ttatttgt	0	0	0	0
0	0	0	cccttgga	ttattttt	0	0	0	0
0	0	0	ccgaagaa	ttcaataa	0	0	0	0
0	0	0	ccgaagac	ttcataat	0	0	0	0
0	0	0	ccgaagat	ttcataga	0	0	0	0
0	0	0	ccgaagga	ttcatagt	0	0	0	0
0	0	0	ccgactga	ttcatata	0	0	0	0
0	0	0	ccgagaga	ttcatgaa	0	0	0	0
0	0	0	ccgaggag	ttcatgca	0	0	0	0
0	0	0	ccgattat	ttcatgct	0	0	0	0
0	0	0	ccggaact	ttccaata	0	0	0	0
0	0	0	ccggaaga	ttccatct	0	0	0	0
0	0	0	ccggacct	ttccgttt	0	0	0	0
0	0	0	ccggaggt	ttcctatt	0	0	0	0
0	0	0	ccggattt	ttccttat	0	0	0	0
0	0	0	ccggctga	ttcctttt	0	0	0	0
0	0	0	ccggtgga	ttcgcttt	0	0	0	0
0	0	0	ccgtcctg	ttcgttct	0	0	0	0
0	0	0	ccgtgaag	ttctattg	0	0	0	0
0	0	0	ccgtgctg	ttctattt	0	0	0	0
0	0	0	ccgtggat	ttctcttt	0	0	0	0
0	0	0	ccgtgtgg	ttctgtta	0	0	0	0
0	0	0	cctaaaga	ttctgttt	0	0	0	0
0	0	0	cctacttc	ttcttatg	0	0	0	0
0	0	0	cctatgct	ttctttat	0	0	0	0
0	0	0	cctccaga	ttctttct	0	0	0	0
0	0	0	cctcgaaa	ttcttttg	0	0	0	0
0	0	0	cctcgagt	ttcttttt	0	0	0	0
0	0	0	cctctact	ttgagtgc	0	0	0	0
0	0	0	cctctgct	ttgcaata	0	0	0	0
0	0	0	cctgaaca	ttgcgatg	0	0	0	0
0	0	0	cctgaacg	ttgggcaa	0	0	0	0
0	0	0	cctgaaga	ttgggggt	0	0	0	0
0	0	0	cctgaagg	ttggtagg	0	0	0	0
0	0	0	cctgaagt	ttgtaata	0	0	0	0
0	0	0	cctgacca	ttgtacta	0	0	0	0
0	0	0	cctgacct	ttgtatgc	0	0	0	0
0	0	0	cctgagaa	ttgtatgt	0	0	0	0
0	0	0	cctgagag	ttgtcttt	0	0	0	0
0	0	0	cctgagga	ttgtgtgt	0	0	0	0
0	0	0	cctgatcg	ttgtgttt	0	0	0	0
0	0	0	cctgcaac	ttgttatt	0	0	0	0
0	0	0	cctgcaga	ttgttcat	0	0	0	0
0	0	0	cctgcagg	ttgtttat	0	0	0	0
0	0	0	cctgccac	ttgtttct	0	0	0	0
0	0	0	cctgccag	ttgtttgc	0	0	0	0
0	0	0	cctgccca	ttgtttgt	0	0	0	0
0	0	0	cctgccct	ttgttttt	0	0	0	0
0	0	0	cctgccga	tttaaaaa	0	0	0	0
0	0	0	cctgcctc	tttaaaac	0	0	0	0
0	0	0	cctgcctg	tttaaaat	0	0	0	0
0	0	0	cctgcgga	tttaaact	0	0	0	0
0	0	0	cctgctag	tttaaagt	0	0	0	0
0	0	0	cctgctct	tttaaata	0	0	0	0
0	0	0	cctgctga	tttaaatg	0	0	0	0
0	0	0	cctgctgt	tttaacaa	0	0	0	0
0	0	0	cctgcttc	tttaacat	0	0	0	0
0	0	0	cctgcttg	tttaacta	0	0	0	0
0	0	0	cctggaag	tttaataa	0	0	0	0
0	0	0	cctggaga	tttaatat	0	0	0	0
0	0	0	cctggagg	tttaatta	0	0	0	0
0	0	0	cctggcag	tttaattt	0	0	0	0
0	0	0	cctggcga	tttacaat	0	0	0	0
0	0	0	cctgtaga	tttacata	0	0	0	0
0	0	0	cctgtgct	tttactag	0	0	0	0
0	0	0	cctgtgga	tttactat	0	0	0	0
0	0	0	cctgtggt	tttacttt	0	0	0	0
0	0	0	cctgttct	tttagttt	0	0	0	0
0	0	0	ccttaaga	tttataaa	0	0	0	0
0	0	0	ccttcaag	tttataat	0	0	0	0
0	0	0	ccttcgtc	tttatact	0	0	0	0
0	0	0	ccttgaag	tttatata	0	0	0	0
0	0	0	ccttgaat	tttatatt	0	0	0	0
0	0	0	ccttggag	tttatgac	0	0	0	0
0	0	0	ccttggat	tttatgct	0	0	0	0
0	0	0	cctttgga	tttatgtt	0	0	0	0
0	0	0	cgaaaacc	tttattat	0	0	0	0
0	0	0	cgaaatca	tttattct	0	0	0	0
0	0	0	cgaacttg	tttattgt	0	0	0	0
0	0	0	cgaagaaa	tttattta	0	0	0	0
0	0	0	cgaagaac	tttatttc	0	0	0	0
0	0	0	cgaagaag	tttatttg	0	0	0	0
0	0	0	cgaagaca	tttatttt	0	0	0	0
0	0	0	cgaagaga	tttcaata	0	0	0	0
0	0	0	cgaagata	tttcatat	0	0	0	0
0	0	0	cgaagatc	tttcatgt	0	0	0	0
0	0	0	cgaagctg	tttcatta	0	0	0	0
0	0	0	cgaaggag	tttcattt	0	0	0	0
0	0	0	cgaagttt	tttcccta	0	0	0	0
0	0	0	cgaataaa	tttcctat	0	0	0	0
0	0	0	cgaataag	tttcctta	0	0	0	0
0	0	0	cgaatcag	tttccttt	0	0	0	0
0	0	0	cgacacag	tttcgttc	0	0	0	0
0	0	0	cgacacat	tttcgttt	0	0	0	0
0	0	0	cgacacgt	tttctatg	0	0	0	0
0	0	0	cgacagga	tttctatt	0	0	0	0
0	0	0	cgacatct	tttctcta	0	0	0	0
0	0	0	cgacattg	tttctctt	0	0	0	0
0	0	0	cgacctga	tttctgtt	0	0	0	0
0	0	0	cgacctgt	tttcttac	0	0	0	0
0	0	0	cgactgaa	tttcttat	0	0	0	0
0	0	0	cgactgag	tttcttgt	0	0	0	0
0	0	0	cgacttca	tttcttta	0	0	0	0
0	0	0	cgacttga	tttctttc	0	0	0	0
0	0	0	cgagaaaa	tttctttg	0	0	0	0
0	0	0	cgagaaga	tttctttt	0	0	0	0
0	0	0	cgagacat	tttgctta	0	0	0	0
0	0	0	cgagatcc	tttgcttt	0	0	0	0
0	0	0	cgaggacc	tttggtta	0	0	0	0
0	0	0	cgaggagg	tttggttt	0	0	0	0
0	0	0	cgagtcaa	tttgtagc	0	0	0	0
0	0	0	cgagtgga	tttgtatg	0	0	0	0
0	0	0	cgatcggt	tttgtatt	0	0	0	0
0	0	0	cgattcag	tttgttat	0	0	0	0
0	0	0	cgattgga	tttgttta	0	0	0	0
0	0	0	cgcaagaa	tttgtttc	0	0	0	0
0	0	0	cgcctgaa	tttgtttg	0	0	0	0
0	0	0	cgctgaag	tttgtttt	0	0	0	0
0	0	0	cgctgatt	ttttaaaa	0	0	0	0
0	0	0	cgctggat	ttttaaat	0	0	0	0
0	0	0	cgctgttg	ttttaata	0	0	0	0
0	0	0	cggaacaa	ttttaatg	0	0	0	0
0	0	0	cggaagaa	ttttaatt	0	0	0	0
0	0	0	cggaagac	ttttacta	0	0	0	0
0	0	0	cggaatca	ttttactt	0	0	0	0
0	0	0	cggaattt	ttttagta	0	0	0	0
0	0	0	cggacctg	ttttagtt	0	0	0	0
0	0	0	cggagaaa	ttttatag	0	0	0	0
0	0	0	cggagaag	ttttatat	0	0	0	0
0	0	0	cggagata	ttttatgt	0	0	0	0
0	0	0	cggagatt	ttttatta	0	0	0	0
0	0	0	cggaggac	ttttattg	0	0	0	0
0	0	0	cggatcca	ttttattt	0	0	0	0
0	0	0	cggatttg	ttttcata	0	0	0	0
0	0	0	cggcacaa	ttttcatt	0	0	0	0
0	0	0	cggcacac	ttttccat	0	0	0	0
0	0	0	cggctgaa	ttttcctt	0	0	0	0
0	0	0	cggctgac	ttttcgta	0	0	0	0
0	0	0	cggctgtt	ttttctat	0	0	0	0
0	0	0	cgggagga	ttttctct	0	0	0	0
0	0	0	cgggattc	ttttctgt	0	0	0	0
0	0	0	cgggctga	ttttctta	0	0	0	0
0	0	0	cggtcctg	ttttcttg	0	0	0	0
0	0	0	cggtcctt	ttttcttt	0	0	0	0
0	0	0	cggtggac	ttttgctt	0	0	0	0
0	0	0	cggtggag	ttttgtat	0	0	0	0
0	0	0	cggtgtat	ttttgtgt	0	0	0	0
0	0	0	cggtgttg	ttttgtta	0	0	0	0
0	0	0	cgtaaaca	ttttgttc	0	0	0	0
0	0	0	cgtagcaa	ttttgttg	0	0	0	0
0	0	0	cgtcagca	ttttgttt	0	0	0	0
0	0	0	cgtcaggt	tttttaaa	0	0	0	0
0	0	0	cgtcatca	tttttaat	0	0	0	0
0	0	0	cgtccttg	tttttaca	0	0	0	0
0	0	0	cgtcgaaa	tttttaga	0	0	0	0
0	0	0	cgtcgtga	tttttagt	0	0	0	0
0	0	0	cgtgaact	tttttata	0	0	0	0
0	0	0	cgtgaaga	tttttatg	0	0	0	0
0	0	0	cgtgagga	tttttatt	0	0	0	0
0	0	0	cgtgctga	tttttcat	0	0	0	0
0	0	0	cgtggtga	tttttcgt	0	0	0	0
0	0	0	cgtgtgga	tttttctt	0	0	0	0
0	0	0	cgtttgcg	tttttgct	0	0	0	0
0	0	0	ctaaagaa	tttttgtt	0	0	0	0
0	0	0	ctaaagac	ttttttaa	0	0	0	0
0	0	0	ctaaccgg	ttttttag	0	0	0	0
0	0	0	ctaagaag	ttttttat	0	0	0	0
0	0	0	ctaaggac	ttttttct	0	0	0	0
0	0	0	ctacaact	ttttttgt	0	0	0	0
0	0	0	ctacagaa	ttttttta	0	0	0	0
0	0	0	ctaccggc	0	0	0	0	0
0	0	0	ctacgaga	0	0	0	0	0
0	0	0	ctactact	0	0	0	0	0
0	0	0	ctagaaga	0	0	0	0	0
0	0	0	ctagaccc	0	0	0	0	0
0	0	0	ctagagga	0	0	0	0	0
0	0	0	ctatcggt	0	0	0	0	0
0	0	0	ctcaacca	0	0	0	0	0
0	0	0	ctcaacgt	0	0	0	0	0
0	0	0	ctcaagaa	0	0	0	0	0
0	0	0	ctcaagac	0	0	0	0	0
0	0	0	ctcaagat	0	0	0	0	0
0	0	0	ctcaagga	0	0	0	0	0
0	0	0	ctccacga	0	0	0	0	0
0	0	0	ctccacgt	0	0	0	0	0
0	0	0	ctccgttg	0	0	0	0	0
0	0	0	ctcctgga	0	0	0	0	0
0	0	0	ctcctgtt	0	0	0	0	0
0	0	0	ctcgaaaa	0	0	0	0	0
0	0	0	ctcgaaga	0	0	0	0	0
0	0	0	ctcgacat	0	0	0	0	0
0	0	0	ctcgagga	0	0	0	0	0
0	0	0	ctctacct	0	0	0	0	0
0	0	0	ctctgacg	0	0	0	0	0
0	0	0	ctctgcca	0	0	0	0	0
0	0	0	ctctgcgt	0	0	0	0	0
0	0	0	ctctgctg	0	0	0	0	0
0	0	0	ctcttgga	0	0	0	0	0
0	0	0	ctgaaaaa	0	0	0	0	0
0	0	0	ctgaaaga	0	0	0	0	0
0	0	0	ctgaacaa	0	0	0	0	0
0	0	0	ctgaacag	0	0	0	0	0
0	0	0	ctgaacga	0	0	0	0	0
0	0	0	ctgaactg	0	0	0	0	0
0	0	0	ctgaagaa	0	0	0	0	0
0	0	0	ctgaagac	0	0	0	0	0
0	0	0	ctgaagag	0	0	0	0	0
0	0	0	ctgaagat	0	0	0	0	0
0	0	0	ctgaagca	0	0	0	0	0
0	0	0	ctgaagga	0	0	0	0	0
0	0	0	ctgaaggg	0	0	0	0	0
0	0	0	ctgaaggt	0	0	0	0	0
0	0	0	ctgaagta	0	0	0	0	0
0	0	0	ctgaataa	0	0	0	0	0
0	0	0	ctgacaag	0	0	0	0	0
0	0	0	ctgacagc	0	0	0	0	0
0	0	0	ctgaccag	0	0	0	0	0
0	0	0	ctgaccga	0	0	0	0	0
0	0	0	ctgacctg	0	0	0	0	0
0	0	0	ctgacgaa	0	0	0	0	0
0	0	0	ctgacgac	0	0	0	0	0
0	0	0	ctgacgag	0	0	0	0	0
0	0	0	ctgacggc	0	0	0	0	0
0	0	0	ctgacgtg	0	0	0	0	0
0	0	0	ctgactac	0	0	0	0	0
0	0	0	ctgacttc	0	0	0	0	0
0	0	0	ctgagaaa	0	0	0	0	0
0	0	0	ctgagaac	0	0	0	0	0
0	0	0	ctgagaag	0	0	0	0	0
0	0	0	ctgagaca	0	0	0	0	0
0	0	0	ctgagcac	0	0	0	0	0
0	0	0	ctgagcag	0	0	0	0	0
0	0	0	ctgaggaa	0	0	0	0	0
0	0	0	ctgaggac	0	0	0	0	0
0	0	0	ctgaggag	0	0	0	0	0
0	0	0	ctgaggat	0	0	0	0	0
0	0	0	ctgaggcc	0	0	0	0	0
0	0	0	ctgagtac	0	0	0	0	0
0	0	0	ctgatccc	0	0	0	0	0
0	0	0	ctgatcgg	0	0	0	0	0
0	0	0	ctgatctg	0	0	0	0	0
0	0	0	ctgatgaa	0	0	0	0	0
0	0	0	ctgattgg	0	0	0	0	0
0	0	0	ctgcagaa	0	0	0	0	0
0	0	0	ctgccaca	0	0	0	0	0
0	0	0	ctgccagc	0	0	0	0	0
0	0	0	ctgccctg	0	0	0	0	0
0	0	0	ctgcctgt	0	0	0	0	0
0	0	0	ctgcgctg	0	0	0	0	0
0	0	0	ctgcggag	0	0	0	0	0
0	0	0	ctgcgtgg	0	0	0	0	0
0	0	0	ctgctcag	0	0	0	0	0
0	0	0	ctgctctc	0	0	0	0	0
0	0	0	ctgctctg	0	0	0	0	0
0	0	0	ctgctgaa	0	0	0	0	0
0	0	0	ctgctgag	0	0	0	0	0
0	0	0	ctgctgta	0	0	0	0	0
0	0	0	ctgctgtg	0	0	0	0	0
0	0	0	ctgctgtt	0	0	0	0	0
0	0	0	ctgcttgg	0	0	0	0	0
0	0	0	ctggaaag	0	0	0	0	0
0	0	0	ctggaaca	0	0	0	0	0
0	0	0	ctggaaga	0	0	0	0	0
0	0	0	ctggaagt	0	0	0	0	0
0	0	0	ctggacac	0	0	0	0	0
0	0	0	ctggacga	0	0	0	0	0
0	0	0	ctggactg	0	0	0	0	0
0	0	0	ctggagaa	0	0	0	0	0
0	0	0	ctggagag	0	0	0	0	0
0	0	0	ctggagat	0	0	0	0	0
0	0	0	ctggagga	0	0	0	0	0
0	0	0	ctggaggg	0	0	0	0	0
0	0	0	ctggaggt	0	0	0	0	0
0	0	0	ctggagta	0	0	0	0	0
0	0	0	ctggatct	0	0	0	0	0
0	0	0	ctggcagt	0	0	0	0	0
0	0	0	ctggcgag	0	0	0	0	0
0	0	0	ctggcgga	0	0	0	0	0
0	0	0	ctggcggt	0	0	0	0	0
0	0	0	ctggctga	0	0	0	0	0
0	0	0	ctggctgc	0	0	0	0	0
0	0	0	ctgggaga	0	0	0	0	0
0	0	0	ctgggagc	0	0	0	0	0
0	0	0	ctggtgaa	0	0	0	0	0
0	0	0	ctggtgga	0	0	0	0	0
0	0	0	ctggtgta	0	0	0	0	0
0	0	0	ctgtagaa	0	0	0	0	0
0	0	0	ctgtagga	0	0	0	0	0
0	0	0	ctgtcctg	0	0	0	0	0
0	0	0	ctgtcgac	0	0	0	0	0
0	0	0	ctgtcggc	0	0	0	0	0
0	0	0	ctgtcggt	0	0	0	0	0
0	0	0	ctgtctgc	0	0	0	0	0
0	0	0	ctgtgcac	0	0	0	0	0
0	0	0	ctgtgcga	0	0	0	0	0
0	0	0	ctgtgcgg	0	0	0	0	0
0	0	0	ctgtgctg	0	0	0	0	0
0	0	0	ctgtggac	0	0	0	0	0
0	0	0	ctgtggag	0	0	0	0	0
0	0	0	ctgtggca	0	0	0	0	0
0	0	0	ctgtggcc	0	0	0	0	0
0	0	0	ctgttcca	0	0	0	0	0
0	0	0	ctgttcgc	0	0	0	0	0
0	0	0	cttcaagc	0	0	0	0	0
0	0	0	cttcaagg	0	0	0	0	0
0	0	0	cttcacgg	0	0	0	0	0
0	0	0	cttcactg	0	0	0	0	0
0	0	0	cttcagac	0	0	0	0	0
0	0	0	cttcagtc	0	0	0	0	0
0	0	0	cttccgac	0	0	0	0	0
0	0	0	cttccggc	0	0	0	0	0
0	0	0	cttcctgg	0	0	0	0	0
0	0	0	cttgaaga	0	0	0	0	0
0	0	0	cttgaagc	0	0	0	0	0
0	0	0	cttgaagg	0	0	0	0	0
0	0	0	cttgacga	0	0	0	0	0
0	0	0	cttgatcc	0	0	0	0	0
0	0	0	cttgcaga	0	0	0	0	0
0	0	0	cttggaac	0	0	0	0	0
0	0	0	cttggacc	0	0	0	0	0
0	0	0	cttggaga	0	0	0	0	0
0	0	0	cttggtcc	0	0	0	0	0
0	0	0	gaaaaaga	0	0	0	0	0
0	0	0	gaaaagaa	0	0	0	0	0
0	0	0	gaaacaga	0	0	0	0	0
0	0	0	gaaaccaa	0	0	0	0	0
0	0	0	gaaacgga	0	0	0	0	0
0	0	0	gaaactca	0	0	0	0	0
0	0	0	gaaactct	0	0	0	0	0
0	0	0	gaaactga	0	0	0	0	0
0	0	0	gaaagaag	0	0	0	0	0
0	0	0	gaaagaga	0	0	0	0	0
0	0	0	gaaagatc	0	0	0	0	0
0	0	0	gaaagcaa	0	0	0	0	0
0	0	0	gaaagcag	0	0	0	0	0
0	0	0	gaaagcga	0	0	0	0	0
0	0	0	gaaagtca	0	0	0	0	0
0	0	0	gaaagtga	0	0	0	0	0
0	0	0	gaaattga	0	0	0	0	0
0	0	0	gaacaaag	0	0	0	0	0
0	0	0	gaacaaga	0	0	0	0	0
0	0	0	gaacacca	0	0	0	0	0
0	0	0	gaacaccc	0	0	0	0	0
0	0	0	gaacagaa	0	0	0	0	0
0	0	0	gaacagcc	0	0	0	0	0
0	0	0	gaacagga	0	0	0	0	0
0	0	0	gaacagtg	0	0	0	0	0
0	0	0	gaaccaga	0	0	0	0	0
0	0	0	gaaccatc	0	0	0	0	0
0	0	0	gaaccctg	0	0	0	0	0
0	0	0	gaacctga	0	0	0	0	0
0	0	0	gaacctgg	0	0	0	0	0
0	0	0	gaacgagc	0	0	0	0	0
0	0	0	gaacgtga	0	0	0	0	0
0	0	0	gaactcga	0	0	0	0	0
0	0	0	gaactgga	0	0	0	0	0
0	0	0	gaacttgc	0	0	0	0	0
0	0	0	gaagaaaa	0	0	0	0	0
0	0	0	gaagaaac	0	0	0	0	0
0	0	0	gaagaaag	0	0	0	0	0
0	0	0	gaagaaat	0	0	0	0	0
0	0	0	gaagaaca	0	0	0	0	0
0	0	0	gaagaacc	0	0	0	0	0
0	0	0	gaagaacg	0	0	0	0	0
0	0	0	gaagaact	0	0	0	0	0
0	0	0	gaagaaga	0	0	0	0	0
0	0	0	gaagaagc	0	0	0	0	0
0	0	0	gaagaagg	0	0	0	0	0
0	0	0	gaagaagt	0	0	0	0	0
0	0	0	gaagaatc	0	0	0	0	0
0	0	0	gaagaatt	0	0	0	0	0
0	0	0	gaagacaa	0	0	0	0	0
0	0	0	gaagacac	0	0	0	0	0
0	0	0	gaagacat	0	0	0	0	0
0	0	0	gaagaccc	0	0	0	0	0
0	0	0	gaagacct	0	0	0	0	0
0	0	0	gaagacga	0	0	0	0	0
0	0	0	gaagactc	0	0	0	0	0
0	0	0	gaagagaa	0	0	0	0	0
0	0	0	gaagagac	0	0	0	0	0
0	0	0	gaagagag	0	0	0	0	0
0	0	0	gaagagat	0	0	0	0	0
0	0	0	gaagagca	0	0	0	0	0
0	0	0	gaagagga	0	0	0	0	0
0	0	0	gaagagtc	0	0	0	0	0
0	0	0	gaagataa	0	0	0	0	0
0	0	0	gaagatac	0	0	0	0	0
0	0	0	gaagatca	0	0	0	0	0
0	0	0	gaagatcc	0	0	0	0	0
0	0	0	gaagatcg	0	0	0	0	0
0	0	0	gaagatct	0	0	0	0	0
0	0	0	gaagatga	0	0	0	0	0
0	0	0	gaagatta	0	0	0	0	0
0	0	0	gaagcaag	0	0	0	0	0
0	0	0	gaagcact	0	0	0	0	0
0	0	0	gaagcaga	0	0	0	0	0
0	0	0	gaagcgaa	0	0	0	0	0
0	0	0	gaagcgga	0	0	0	0	0
0	0	0	gaagcgtg	0	0	0	0	0
0	0	0	gaagctaa	0	0	0	0	0
0	0	0	gaagctca	0	0	0	0	0
0	0	0	gaagctcc	0	0	0	0	0
0	0	0	gaagctct	0	0	0	0	0
0	0	0	gaagctga	0	0	0	0	0
0	0	0	gaagctgg	0	0	0	0	0
0	0	0	gaagctgt	0	0	0	0	0
0	0	0	gaaggaaa	0	0	0	0	0
0	0	0	gaaggaac	0	0	0	0	0
0	0	0	gaaggaag	0	0	0	0	0
0	0	0	gaaggacc	0	0	0	0	0
0	0	0	gaaggact	0	0	0	0	0
0	0	0	gaaggaga	0	0	0	0	0
0	0	0	gaaggagc	0	0	0	0	0
0	0	0	gaaggagg	0	0	0	0	0
0	0	0	gaaggagt	0	0	0	0	0
0	0	0	gaaggatc	0	0	0	0	0
0	0	0	gaagggaa	0	0	0	0	0
0	0	0	gaagggga	0	0	0	0	0
0	0	0	gaaggtga	0	0	0	0	0
0	0	0	gaagtaag	0	0	0	0	0
0	0	0	gaagtacg	0	0	0	0	0
0	0	0	gaagtaga	0	0	0	0	0
0	0	0	gaagtcaa	0	0	0	0	0
0	0	0	gaagtgaa	0	0	0	0	0
0	0	0	gaagtgga	0	0	0	0	0
0	0	0	gaagttga	0	0	0	0	0
0	0	0	gaatcaga	0	0	0	0	0
0	0	0	gaatcagc	0	0	0	0	0
0	0	0	gaatccct	0	0	0	0	0
0	0	0	gaatcctg	0	0	0	0	0
0	0	0	gaatctga	0	0	0	0	0
0	0	0	gacaactg	0	0	0	0	0
0	0	0	gacaagct	0	0	0	0	0
0	0	0	gacaagtg	0	0	0	0	0
0	0	0	gacaatct	0	0	0	0	0
0	0	0	gacacaga	0	0	0	0	0
0	0	0	gacacatc	0	0	0	0	0
0	0	0	gacagaag	0	0	0	0	0
0	0	0	gacagctg	0	0	0	0	0
0	0	0	gacaggcc	0	0	0	0	0
0	0	0	gacagtga	0	0	0	0	0
0	0	0	gacatcag	0	0	0	0	0
0	0	0	gacatcgg	0	0	0	0	0
0	0	0	gacatctg	0	0	0	0	0
0	0	0	gacattga	0	0	0	0	0
0	0	0	gaccaaca	0	0	0	0	0
0	0	0	gaccaagg	0	0	0	0	0
0	0	0	gaccagaa	0	0	0	0	0
0	0	0	gaccagac	0	0	0	0	0
0	0	0	gaccagag	0	0	0	0	0
0	0	0	gaccagca	0	0	0	0	0
0	0	0	gaccagcc	0	0	0	0	0
0	0	0	gaccagcg	0	0	0	0	0
0	0	0	gaccagta	0	0	0	0	0
0	0	0	gaccagtc	0	0	0	0	0
0	0	0	gaccagtg	0	0	0	0	0
0	0	0	gaccatca	0	0	0	0	0
0	0	0	gaccatcc	0	0	0	0	0
0	0	0	gaccatcg	0	0	0	0	0
0	0	0	gaccatct	0	0	0	0	0
0	0	0	gacccagc	0	0	0	0	0
0	0	0	gacccagt	0	0	0	0	0
0	0	0	gacccatt	0	0	0	0	0
0	0	0	gacccgat	0	0	0	0	0
0	0	0	gaccctga	0	0	0	0	0
0	0	0	gaccggag	0	0	0	0	0
0	0	0	gacctatc	0	0	0	0	0
0	0	0	gacctctg	0	0	0	0	0
0	0	0	gacctgaa	0	0	0	0	0
0	0	0	gacctgac	0	0	0	0	0
0	0	0	gacctgag	0	0	0	0	0
0	0	0	gacctgat	0	0	0	0	0
0	0	0	gacctgca	0	0	0	0	0
0	0	0	gacctgcc	0	0	0	0	0
0	0	0	gacctgct	0	0	0	0	0
0	0	0	gacctgga	0	0	0	0	0
0	0	0	gacctgtc	0	0	0	0	0
0	0	0	gacctgtg	0	0	0	0	0
0	0	0	gaccttca	0	0	0	0	0
0	0	0	gaccttga	0	0	0	0	0
0	0	0	gacgaacc	0	0	0	0	0
0	0	0	gacgaact	0	0	0	0	0
0	0	0	gacgaaga	0	0	0	0	0
0	0	0	gacgaagt	0	0	0	0	0
0	0	0	gacgagaa	0	0	0	0	0
0	0	0	gacgagca	0	0	0	0	0
0	0	0	gacgagga	0	0	0	0	0
0	0	0	gacgatca	0	0	0	0	0
0	0	0	gacgatga	0	0	0	0	0
0	0	0	gacgctca	0	0	0	0	0
0	0	0	gacggtga	0	0	0	0	0
0	0	0	gacgtaca	0	0	0	0	0
0	0	0	gacgtgag	0	0	0	0	0
0	0	0	gacgtgct	0	0	0	0	0
0	0	0	gacgtgga	0	0	0	0	0
0	0	0	gacgttga	0	0	0	0	0
0	0	0	gactacaa	0	0	0	0	0
0	0	0	gactcaac	0	0	0	0	0
0	0	0	gactcatc	0	0	0	0	0
0	0	0	gactcctt	0	0	0	0	0
0	0	0	gactgaag	0	0	0	0	0
0	0	0	gactggac	0	0	0	0	0
0	0	0	gacttcaa	0	0	0	0	0
0	0	0	gacttcac	0	0	0	0	0
0	0	0	gacttctg	0	0	0	0	0
0	0	0	gacttgac	0	0	0	0	0
0	0	0	gactttga	0	0	0	0	0
0	0	0	gagaaaaa	0	0	0	0	0
0	0	0	gagaaaac	0	0	0	0	0
0	0	0	gagaaact	0	0	0	0	0
0	0	0	gagaaatc	0	0	0	0	0
0	0	0	gagaaccc	0	0	0	0	0
0	0	0	gagaactg	0	0	0	0	0
0	0	0	gagaagaa	0	0	0	0	0
0	0	0	gagaagac	0	0	0	0	0
0	0	0	gagaagag	0	0	0	0	0
0	0	0	gagaagat	0	0	0	0	0
0	0	0	gagaagca	0	0	0	0	0
0	0	0	gagaagcg	0	0	0	0	0
0	0	0	gagaagct	0	0	0	0	0
0	0	0	gagaagga	0	0	0	0	0
0	0	0	gagaaggt	0	0	0	0	0
0	0	0	gagaagtt	0	0	0	0	0
0	0	0	gagaatca	0	0	0	0	0
0	0	0	gagaatct	0	0	0	0	0
0	0	0	gagacaac	0	0	0	0	0
0	0	0	gagacaat	0	0	0	0	0
0	0	0	gagacacc	0	0	0	0	0
0	0	0	gagacatc	0	0	0	0	0
0	0	0	gagacctc	0	0	0	0	0
0	0	0	gagacctg	0	0	0	0	0
0	0	0	gagacgat	0	0	0	0	0
0	0	0	gagagaag	0	0	0	0	0
0	0	0	gagagatc	0	0	0	0	0
0	0	0	gagagctt	0	0	0	0	0
0	0	0	gagaggaa	0	0	0	0	0
0	0	0	gagaggat	0	0	0	0	0
0	0	0	gagatccg	0	0	0	0	0
0	0	0	gagatcct	0	0	0	0	0
0	0	0	gagatcgt	0	0	0	0	0
0	0	0	gagatctc	0	0	0	0	0
0	0	0	gagcaagt	0	0	0	0	0
0	0	0	gagcactg	0	0	0	0	0
0	0	0	gagcagaa	0	0	0	0	0
0	0	0	gagcagct	0	0	0	0	0
0	0	0	gagcagga	0	0	0	0	0
0	0	0	gagcatct	0	0	0	0	0
0	0	0	gagcgatt	0	0	0	0	0
0	0	0	gagcgtct	0	0	0	0	0
0	0	0	gagctgaa	0	0	0	0	0
0	0	0	gagctgac	0	0	0	0	0
0	0	0	gagctgct	0	0	0	0	0
0	0	0	gagctggc	0	0	0	0	0
0	0	0	gagctgtt	0	0	0	0	0
0	0	0	gaggaaac	0	0	0	0	0
0	0	0	gaggaaca	0	0	0	0	0
0	0	0	gaggaacc	0	0	0	0	0
0	0	0	gaggaacg	0	0	0	0	0
0	0	0	gaggaact	0	0	0	0	0
0	0	0	gaggaaga	0	0	0	0	0
0	0	0	gaggaagc	0	0	0	0	0
0	0	0	gaggaatc	0	0	0	0	0
0	0	0	gaggacac	0	0	0	0	0
0	0	0	gaggacca	0	0	0	0	0
0	0	0	gaggaccc	0	0	0	0	0
0	0	0	gaggaccg	0	0	0	0	0
0	0	0	gaggacct	0	0	0	0	0
0	0	0	gaggacga	0	0	0	0	0
0	0	0	gaggactc	0	0	0	0	0
0	0	0	gaggagaa	0	0	0	0	0
0	0	0	gaggagac	0	0	0	0	0
0	0	0	gaggagat	0	0	0	0	0
0	0	0	gaggagca	0	0	0	0	0
0	0	0	gaggagcc	0	0	0	0	0
0	0	0	gaggagct	0	0	0	0	0
0	0	0	gaggagga	0	0	0	0	0
0	0	0	gaggaggt	0	0	0	0	0
0	0	0	gaggagta	0	0	0	0	0
0	0	0	gaggagtg	0	0	0	0	0
0	0	0	gaggatcc	0	0	0	0	0
0	0	0	gaggatct	0	0	0	0	0
0	0	0	gaggattc	0	0	0	0	0
0	0	0	gaggcccc	0	0	0	0	0
0	0	0	gaggctct	0	0	0	0	0
0	0	0	gaggtgga	0	0	0	0	0
0	0	0	gagtagcc	0	0	0	0	0
0	0	0	gagtcacc	0	0	0	0	0
0	0	0	gagtcatc	0	0	0	0	0
0	0	0	gagtcctg	0	0	0	0	0
0	0	0	gagtggac	0	0	0	0	0
0	0	0	gagttgcc	0	0	0	0	0
0	0	0	gatatccg	0	0	0	0	0
0	0	0	gatcaacg	0	0	0	0	0
0	0	0	gatcagag	0	0	0	0	0
0	0	0	gatcagca	0	0	0	0	0
0	0	0	gatcagcc	0	0	0	0	0
0	0	0	gatcatca	0	0	0	0	0
0	0	0	gatcctca	0	0	0	0	0
0	0	0	gatcctgc	0	0	0	0	0
0	0	0	gatcctgg	0	0	0	0	0
0	0	0	gatcgaag	0	0	0	0	0
0	0	0	gatcgcaa	0	0	0	0	0
0	0	0	gatctcca	0	0	0	0	0
0	0	0	gatctgaa	0	0	0	0	0
0	0	0	gatctgag	0	0	0	0	0
0	0	0	gatctgca	0	0	0	0	0
0	0	0	gatctgga	0	0	0	0	0
0	0	0	gatcttca	0	0	0	0	0
0	0	0	gatgaaga	0	0	0	0	0
0	0	0	gatgagga	0	0	0	0	0
0	0	0	gatgctga	0	0	0	0	0
0	0	0	gattactc	0	0	0	0	0
0	0	0	gattcaac	0	0	0	0	0
0	0	0	gattcagc	0	0	0	0	0
0	0	0	gattcctc	0	0	0	0	0
0	0	0	gattgaac	0	0	0	0	0
0	0	0	gcaaacga	0	0	0	0	0
0	0	0	gcaaagaa	0	0	0	0	0
0	0	0	gcaactcc	0	0	0	0	0
0	0	0	gcaagaaa	0	0	0	0	0
0	0	0	gcaagaac	0	0	0	0	0
0	0	0	gcaagaat	0	0	0	0	0
0	0	0	gcaagcaa	0	0	0	0	0
0	0	0	gcaaggac	0	0	0	0	0
0	0	0	gcaaggag	0	0	0	0	0
0	0	0	gcacagaa	0	0	0	0	0
0	0	0	gcacgaac	0	0	0	0	0
0	0	0	gcacggaa	0	0	0	0	0
0	0	0	gcactgaa	0	0	0	0	0
0	0	0	gcactgga	0	0	0	0	0
0	0	0	gcagaact	0	0	0	0	0
0	0	0	gcagaaga	0	0	0	0	0
0	0	0	gcagaagt	0	0	0	0	0
0	0	0	gcagagaa	0	0	0	0	0
0	0	0	gcagcctt	0	0	0	0	0
0	0	0	gcagctga	0	0	0	0	0
0	0	0	gcagctgg	0	0	0	0	0
0	0	0	gcagctgt	0	0	0	0	0
0	0	0	gcagcttc	0	0	0	0	0
0	0	0	gcagtgaa	0	0	0	0	0
0	0	0	gcatctga	0	0	0	0	0
0	0	0	gcatctgc	0	0	0	0	0
0	0	0	gcatcttc	0	0	0	0	0
0	0	0	gcattgaa	0	0	0	0	0
0	0	0	gcattgag	0	0	0	0	0
0	0	0	gccaccag	0	0	0	0	0
0	0	0	gccagaac	0	0	0	0	0
0	0	0	gccagaag	0	0	0	0	0
0	0	0	gccagcag	0	0	0	0	0
0	0	0	gccagtac	0	0	0	0	0
0	0	0	gccattga	0	0	0	0	0
0	0	0	gccctgaa	0	0	0	0	0
0	0	0	gccgtaaa	0	0	0	0	0
0	0	0	gccgtgaa	0	0	0	0	0
0	0	0	gcctcctg	0	0	0	0	0
0	0	0	gcctcgag	0	0	0	0	0
0	0	0	gcctgaag	0	0	0	0	0
0	0	0	gcctgatc	0	0	0	0	0
0	0	0	gcctgctg	0	0	0	0	0
0	0	0	gcctggaa	0	0	0	0	0
0	0	0	gccttcaa	0	0	0	0	0
0	0	0	gccttcag	0	0	0	0	0
0	0	0	gcgattca	0	0	0	0	0
0	0	0	gcggaacc	0	0	0	0	0
0	0	0	gcggaaga	0	0	0	0	0
0	0	0	gcggcact	0	0	0	0	0
0	0	0	gcgtcaca	0	0	0	0	0
0	0	0	gcgtcctt	0	0	0	0	0
0	0	0	gctccagt	0	0	0	0	0
0	0	0	gctcgtca	0	0	0	0	0
0	0	0	gctctgct	0	0	0	0	0
0	0	0	gctgaaaa	0	0	0	0	0
0	0	0	gctgaaca	0	0	0	0	0
0	0	0	gctgaaga	0	0	0	0	0
0	0	0	gctgaagc	0	0	0	0	0
0	0	0	gctgaagg	0	0	0	0	0
0	0	0	gctgacaa	0	0	0	0	0
0	0	0	gctgacat	0	0	0	0	0
0	0	0	gctgacca	0	0	0	0	0
0	0	0	gctgacct	0	0	0	0	0
0	0	0	gctgacga	0	0	0	0	0
0	0	0	gctgacgt	0	0	0	0	0
0	0	0	gctgagaa	0	0	0	0	0
0	0	0	gctgagac	0	0	0	0	0
0	0	0	gctgagga	0	0	0	0	0
0	0	0	gctgagta	0	0	0	0	0
0	0	0	gctgctga	0	0	0	0	0
0	0	0	gctggaaa	0	0	0	0	0
0	0	0	gctggaga	0	0	0	0	0
0	0	0	gctggcag	0	0	0	0	0
0	0	0	gctggcgg	0	0	0	0	0
0	0	0	gctggctg	0	0	0	0	0
0	0	0	gctgtaga	0	0	0	0	0
0	0	0	gctgtgct	0	0	0	0	0
0	0	0	gctgtgga	0	0	0	0	0
0	0	0	gctgttcc	0	0	0	0	0
0	0	0	gctgttgc	0	0	0	0	0
0	0	0	gctgttgt	0	0	0	0	0
0	0	0	gcttctac	0	0	0	0	0
0	0	0	ggaaactg	0	0	0	0	0
0	0	0	ggaaactt	0	0	0	0	0
0	0	0	ggaacaat	0	0	0	0	0
0	0	0	ggaacacc	0	0	0	0	0
0	0	0	ggaacctg	0	0	0	0	0
0	0	0	ggaacctt	0	0	0	0	0
0	0	0	ggaacttg	0	0	0	0	0
0	0	0	ggaagaaa	0	0	0	0	0
0	0	0	ggaagaac	0	0	0	0	0
0	0	0	ggaagaag	0	0	0	0	0
0	0	0	ggaagaca	0	0	0	0	0
0	0	0	ggaagacc	0	0	0	0	0
0	0	0	ggaagaga	0	0	0	0	0
0	0	0	ggaagata	0	0	0	0	0
0	0	0	ggaagcga	0	0	0	0	0
0	0	0	ggaagctg	0	0	0	0	0
0	0	0	ggaagtga	0	0	0	0	0
0	0	0	ggaattca	0	0	0	0	0
0	0	0	ggacacga	0	0	0	0	0
0	0	0	ggacactt	0	0	0	0	0
0	0	0	ggacattg	0	0	0	0	0
0	0	0	ggaccaag	0	0	0	0	0
0	0	0	ggaccaga	0	0	0	0	0
0	0	0	ggaccagt	0	0	0	0	0
0	0	0	ggaccatc	0	0	0	0	0
0	0	0	ggaccatt	0	0	0	0	0
0	0	0	ggaccctg	0	0	0	0	0
0	0	0	ggaccgga	0	0	0	0	0
0	0	0	ggacctca	0	0	0	0	0
0	0	0	ggacctga	0	0	0	0	0
0	0	0	ggacctgc	0	0	0	0	0
0	0	0	ggacctgt	0	0	0	0	0
0	0	0	ggaccttc	0	0	0	0	0
0	0	0	ggacggtg	0	0	0	0	0
0	0	0	ggactcca	0	0	0	0	0
0	0	0	ggactgtg	0	0	0	0	0
0	0	0	ggacttct	0	0	0	0	0
0	0	0	ggagaaaa	0	0	0	0	0
0	0	0	ggagaaac	0	0	0	0	0
0	0	0	ggagaaag	0	0	0	0	0
0	0	0	ggagaacc	0	0	0	0	0
0	0	0	ggagaaga	0	0	0	0	0
0	0	0	ggagaagc	0	0	0	0	0
0	0	0	ggagaagt	0	0	0	0	0
0	0	0	ggagaatc	0	0	0	0	0
0	0	0	ggagacac	0	0	0	0	0
0	0	0	ggagagga	0	0	0	0	0
0	0	0	ggagatac	0	0	0	0	0
0	0	0	ggagattc	0	0	0	0	0
0	0	0	ggagcaag	0	0	0	0	0
0	0	0	ggagcacc	0	0	0	0	0
0	0	0	ggagcact	0	0	0	0	0
0	0	0	ggagctct	0	0	0	0	0
0	0	0	ggagctga	0	0	0	0	0
0	0	0	ggagctgg	0	0	0	0	0
0	0	0	ggagctgt	0	0	0	0	0
0	0	0	ggaggaac	0	0	0	0	0
0	0	0	ggaggaag	0	0	0	0	0
0	0	0	ggaggaat	0	0	0	0	0
0	0	0	ggaggaca	0	0	0	0	0
0	0	0	ggaggacc	0	0	0	0	0
0	0	0	ggaggacg	0	0	0	0	0
0	0	0	ggaggact	0	0	0	0	0
0	0	0	ggaggaga	0	0	0	0	0
0	0	0	ggaggagc	0	0	0	0	0
0	0	0	ggaggagg	0	0	0	0	0
0	0	0	ggaggagt	0	0	0	0	0
0	0	0	ggaggatc	0	0	0	0	0
0	0	0	ggagtacc	0	0	0	0	0
0	0	0	ggagtcaa	0	0	0	0	0
0	0	0	ggagtcga	0	0	0	0	0
0	0	0	ggatccag	0	0	0	0	0
0	0	0	ggatccga	0	0	0	0	0
0	0	0	ggatctcc	0	0	0	0	0
0	0	0	ggatgacc	0	0	0	0	0
0	0	0	ggattcga	0	0	0	0	0
0	0	0	ggattcta	0	0	0	0	0
0	0	0	ggatttgc	0	0	0	0	0
0	0	0	ggcagaag	0	0	0	0	0
0	0	0	ggcctgaa	0	0	0	0	0
0	0	0	ggcctgtt	0	0	0	0	0
0	0	0	ggcggact	0	0	0	0	0
0	0	0	ggcgtgaa	0	0	0	0	0
0	0	0	ggctgacc	0	0	0	0	0
0	0	0	ggggaaac	0	0	0	0	0
0	0	0	ggggaatc	0	0	0	0	0
0	0	0	ggtcacca	0	0	0	0	0
0	0	0	ggtccaga	0	0	0	0	0
0	0	0	ggtcctgc	0	0	0	0	0
0	0	0	ggtgaact	0	0	0	0	0
0	0	0	ggtgaaga	0	0	0	0	0
0	0	0	ggtgacct	0	0	0	0	0
0	0	0	ggtggacc	0	0	0	0	0
0	0	0	ggtggagc	0	0	0	0	0
0	0	0	ggttccaa	0	0	0	0	0
0	0	0	gtacctga	0	0	0	0	0
0	0	0	gtagaaga	0	0	0	0	0
0	0	0	gtaggacc	0	0	0	0	0
0	0	0	gtcaaatc	0	0	0	0	0
0	0	0	gtcacatc	0	0	0	0	0
0	0	0	gtcagcag	0	0	0	0	0
0	0	0	gtcatcag	0	0	0	0	0
0	0	0	gtccaacc	0	0	0	0	0
0	0	0	gtccagaa	0	0	0	0	0
0	0	0	gtcctacc	0	0	0	0	0
0	0	0	gtcctgag	0	0	0	0	0
0	0	0	gtcctgat	0	0	0	0	0
0	0	0	gtcctgcc	0	0	0	0	0
0	0	0	gtcctgcg	0	0	0	0	0
0	0	0	gtcctgct	0	0	0	0	0
0	0	0	gtcctgga	0	0	0	0	0
0	0	0	gtcctggt	0	0	0	0	0
0	0	0	gtcgaaga	0	0	0	0	0
0	0	0	gtcgacac	0	0	0	0	0
0	0	0	gtcgagct	0	0	0	0	0
0	0	0	gtcgtcaa	0	0	0	0	0
0	0	0	gtcgtcag	0	0	0	0	0
0	0	0	gtctatcg	0	0	0	0	0
0	0	0	gtctgtcg	0	0	0	0	0
0	0	0	gtcttcag	0	0	0	0	0
0	0	0	gtgaaatc	0	0	0	0	0
0	0	0	gtgaacac	0	0	0	0	0
0	0	0	gtgaacct	0	0	0	0	0
0	0	0	gtgaacga	0	0	0	0	0
0	0	0	gtgaactc	0	0	0	0	0
0	0	0	gtgaagaa	0	0	0	0	0
0	0	0	gtgaagat	0	0	0	0	0
0	0	0	gtgaagct	0	0	0	0	0
0	0	0	gtgaagga	0	0	0	0	0
0	0	0	gtgaccag	0	0	0	0	0
0	0	0	gtgacctg	0	0	0	0	0
0	0	0	gtgacctt	0	0	0	0	0
0	0	0	gtgagatc	0	0	0	0	0
0	0	0	gtgaggag	0	0	0	0	0
0	0	0	gtgcaact	0	0	0	0	0
0	0	0	gtgcagct	0	0	0	0	0
0	0	0	gtgcatct	0	0	0	0	0
0	0	0	gtgccctg	0	0	0	0	0
0	0	0	gtgctgct	0	0	0	0	0
0	0	0	gtggaaac	0	0	0	0	0
0	0	0	gtggaaga	0	0	0	0	0
0	0	0	gtggaatc	0	0	0	0	0
0	0	0	gtggacac	0	0	0	0	0
0	0	0	gtggacca	0	0	0	0	0
0	0	0	gtggaccc	0	0	0	0	0
0	0	0	gtggacga	0	0	0	0	0
0	0	0	gtggactc	0	0	0	0	0
0	0	0	gtggagaa	0	0	0	0	0
0	0	0	gtggagca	0	0	0	0	0
0	0	0	gtggagct	0	0	0	0	0
0	0	0	gtggagga	0	0	0	0	0
0	0	0	gtggagtc	0	0	0	0	0
0	0	0	gtggtccc	0	0	0	0	0
0	0	0	gtgtcgca	0	0	0	0	0
0	0	0	gtgtggac	0	0	0	0	0
0	0	0	gtgtggcc	0	0	0	0	0
0	0	0	gttcagct	0	0	0	0	0
0	0	0	gttccgtc	0	0	0	0	0
0	0	0	gttctcag	0	0	0	0	0
0	0	0	gttgaaga	0	0	0	0	0
0	0	0	gttgacct	0	0	0	0	0
0	0	0	gttgcaga	0	0	0	0	0
0	0	0	gttgcgaa	0	0	0	0	0
0	0	0	gtttcgac	0	0	0	0	0
0	0	0	taaccggc	0	0	0	0	0
0	0	0	taacctgc	0	0	0	0	0
0	0	0	taacgact	0	0	0	0	0
0	0	0	taagaaga	0	0	0	0	0
0	0	0	taaggaga	0	0	0	0	0
0	0	0	tacaaccg	0	0	0	0	0
0	0	0	tacaactc	0	0	0	0	0
0	0	0	tacagagg	0	0	0	0	0
0	0	0	taccgtcg	0	0	0	0	0
0	0	0	tacctcac	0	0	0	0	0
0	0	0	tacctgac	0	0	0	0	0
0	0	0	tacctgag	0	0	0	0	0
0	0	0	tacctgcc	0	0	0	0	0
0	0	0	tacctgga	0	0	0	0	0
0	0	0	tactccgt	0	0	0	0	0
0	0	0	tactctgc	0	0	0	0	0
0	0	0	tactgaag	0	0	0	0	0
0	0	0	tagaagaa	0	0	0	0	0
0	0	0	tagaagga	0	0	0	0	0
0	0	0	tagaggcc	0	0	0	0	0
0	0	0	tagcgtct	0	0	0	0	0
0	0	0	taggagaa	0	0	0	0	0
0	0	0	taggagga	0	0	0	0	0
0	0	0	tcaaccag	0	0	0	0	0
0	0	0	tcaacctg	0	0	0	0	0
0	0	0	tcaacgac	0	0	0	0	0
0	0	0	tcaacgag	0	0	0	0	0
0	0	0	tcaagaac	0	0	0	0	0
0	0	0	tcaagaag	0	0	0	0	0
0	0	0	tcaagaca	0	0	0	0	0
0	0	0	tcaagccg	0	0	0	0	0
0	0	0	tcaaggag	0	0	0	0	0
0	0	0	tcacagac	0	0	0	0	0
0	0	0	tcacagga	0	0	0	0	0
0	0	0	tcacctgc	0	0	0	0	0
0	0	0	tcacggac	0	0	0	0	0
0	0	0	tcactgag	0	0	0	0	0
0	0	0	tcagaaga	0	0	0	0	0
0	0	0	tcagaagt	0	0	0	0	0
0	0	0	tcagacct	0	0	0	0	0
0	0	0	tcagacga	0	0	0	0	0
0	0	0	tcagagga	0	0	0	0	0
0	0	0	tcagcaag	0	0	0	0	0
0	0	0	tcagcagg	0	0	0	0	0
0	0	0	tcagcatt	0	0	0	0	0
0	0	0	tcagcgtg	0	0	0	0	0
0	0	0	tcagcgtt	0	0	0	0	0
0	0	0	tcagctcc	0	0	0	0	0
0	0	0	tcagctgt	0	0	0	0	0
0	0	0	tcaggagg	0	0	0	0	0
0	0	0	tcaggatt	0	0	0	0	0
0	0	0	tcaggtgc	0	0	0	0	0
0	0	0	tcagtcca	0	0	0	0	0
0	0	0	tcagttcc	0	0	0	0	0
0	0	0	tcatctgc	0	0	0	0	0
0	0	0	tcatcttc	0	0	0	0	0
0	0	0	tccacaac	0	0	0	0	0
0	0	0	tccacaag	0	0	0	0	0
0	0	0	tccacgac	0	0	0	0	0
0	0	0	tccacgtg	0	0	0	0	0
0	0	0	tccagaac	0	0	0	0	0
0	0	0	tccagaag	0	0	0	0	0
0	0	0	tccagcaa	0	0	0	0	0
0	0	0	tccagcag	0	0	0	0	0
0	0	0	tccagctg	0	0	0	0	0
0	0	0	tccaggag	0	0	0	0	0
0	0	0	tccagtgc	0	0	0	0	0
0	0	0	tccagttg	0	0	0	0	0
0	0	0	tcccggaa	0	0	0	0	0
0	0	0	tcccggct	0	0	0	0	0
0	0	0	tcccggtt	0	0	0	0	0
0	0	0	tccctgac	0	0	0	0	0
0	0	0	tccctgga	0	0	0	0	0
0	0	0	tccctgtg	0	0	0	0	0
0	0	0	tccgaata	0	0	0	0	0
0	0	0	tccgagga	0	0	0	0	0
0	0	0	tccgagta	0	0	0	0	0
0	0	0	tccggaga	0	0	0	0	0
0	0	0	tccgggaa	0	0	0	0	0
0	0	0	tccgggta	0	0	0	0	0
0	0	0	tccgggtt	0	0	0	0	0
0	0	0	tccgtgtt	0	0	0	0	0
0	0	0	tcctcagc	0	0	0	0	0
0	0	0	tcctcctg	0	0	0	0	0
0	0	0	tcctcgaa	0	0	0	0	0
0	0	0	tcctgaag	0	0	0	0	0
0	0	0	tcctgagg	0	0	0	0	0
0	0	0	tcctgatg	0	0	0	0	0
0	0	0	tcctgcaa	0	0	0	0	0
0	0	0	tcctgccc	0	0	0	0	0
0	0	0	tcctgcct	0	0	0	0	0
0	0	0	tcctgctg	0	0	0	0	0
0	0	0	tcctggaa	0	0	0	0	0
0	0	0	tcctggac	0	0	0	0	0
0	0	0	tcctggag	0	0	0	0	0
0	0	0	tcctggta	0	0	0	0	0
0	0	0	tcctggtg	0	0	0	0	0
0	0	0	tcctgtgc	0	0	0	0	0
0	0	0	tcctgtgg	0	0	0	0	0
0	0	0	tccttgaa	0	0	0	0	0
0	0	0	tcgaaagc	0	0	0	0	0
0	0	0	tcgaagaa	0	0	0	0	0
0	0	0	tcgacacg	0	0	0	0	0
0	0	0	tcgactca	0	0	0	0	0
0	0	0	tcgagacc	0	0	0	0	0
0	0	0	tcgagagg	0	0	0	0	0
0	0	0	tcgagagt	0	0	0	0	0
0	0	0	tcgagctg	0	0	0	0	0
0	0	0	tcgagtca	0	0	0	0	0
0	0	0	tcgagttg	0	0	0	0	0
0	0	0	tcgccgtg	0	0	0	0	0
0	0	0	tcgcggtt	0	0	0	0	0
0	0	0	tcggacca	0	0	0	0	0
0	0	0	tcggagac	0	0	0	0	0
0	0	0	tcggatcc	0	0	0	0	0
0	0	0	tcggcctg	0	0	0	0	0
0	0	0	tcggctga	0	0	0	0	0
0	0	0	tcgggtcc	0	0	0	0	0
0	0	0	tcggttgc	0	0	0	0	0
0	0	0	tcgtcaag	0	0	0	0	0
0	0	0	tcgtcctg	0	0	0	0	0
0	0	0	tcgtctgc	0	0	0	0	0
0	0	0	tcgtgaag	0	0	0	0	0
0	0	0	tcgtgacg	0	0	0	0	0
0	0	0	tcgtgagg	0	0	0	0	0
0	0	0	tcgtggaa	0	0	0	0	0
0	0	0	tcgtgtgg	0	0	0	0	0
0	0	0	tcgttgga	0	0	0	0	0
0	0	0	tctaaccg	0	0	0	0	0
0	0	0	tctacctg	0	0	0	0	0
0	0	0	tctcaaga	0	0	0	0	0
0	0	0	tctcagga	0	0	0	0	0
0	0	0	tctccaca	0	0	0	0	0
0	0	0	tctcccag	0	0	0	0	0
0	0	0	tctccgac	0	0	0	0	0
0	0	0	tctgaaga	0	0	0	0	0
0	0	0	tctgaagg	0	0	0	0	0
0	0	0	tctgaccg	0	0	0	0	0
0	0	0	tctgacct	0	0	0	0	0
0	0	0	tctgacga	0	0	0	0	0
0	0	0	tctgacgg	0	0	0	0	0
0	0	0	tctgatcg	0	0	0	0	0
0	0	0	tctgattg	0	0	0	0	0
0	0	0	tctgcaag	0	0	0	0	0
0	0	0	tctgcaga	0	0	0	0	0
0	0	0	tctgcgtc	0	0	0	0	0
0	0	0	tctgctac	0	0	0	0	0
0	0	0	tctgctga	0	0	0	0	0
0	0	0	tctgctgg	0	0	0	0	0
0	0	0	tctggagg	0	0	0	0	0
0	0	0	tctggcgt	0	0	0	0	0
0	0	0	tctggtga	0	0	0	0	0
0	0	0	tctgtcct	0	0	0	0	0
0	0	0	tctgtcgg	0	0	0	0	0
0	0	0	tctgtgcg	0	0	0	0	0
0	0	0	tctgtgga	0	0	0	0	0
0	0	0	tctgtggc	0	0	0	0	0
0	0	0	tctgttcc	0	0	0	0	0
0	0	0	tcttcacg	0	0	0	0	0
0	0	0	tcttcact	0	0	0	0	0
0	0	0	tcttcagg	0	0	0	0	0
0	0	0	tcttccgg	0	0	0	0	0
0	0	0	tgaaagag	0	0	0	0	0
0	0	0	tgaacaag	0	0	0	0	0
0	0	0	tgaacaga	0	0	0	0	0
0	0	0	tgaacagc	0	0	0	0	0
0	0	0	tgaaccct	0	0	0	0	0
0	0	0	tgaacgag	0	0	0	0	0
0	0	0	tgaactct	0	0	0	0	0
0	0	0	tgaagaaa	0	0	0	0	0
0	0	0	tgaagaac	0	0	0	0	0
0	0	0	tgaagaag	0	0	0	0	0
0	0	0	tgaagaat	0	0	0	0	0
0	0	0	tgaagaca	0	0	0	0	0
0	0	0	tgaagacc	0	0	0	0	0
0	0	0	tgaagacg	0	0	0	0	0
0	0	0	tgaagaga	0	0	0	0	0
0	0	0	tgaagagc	0	0	0	0	0
0	0	0	tgaagagg	0	0	0	0	0
0	0	0	tgaagata	0	0	0	0	0
0	0	0	tgaagatc	0	0	0	0	0
0	0	0	tgaagcac	0	0	0	0	0
0	0	0	tgaagcag	0	0	0	0	0
0	0	0	tgaagcga	0	0	0	0	0
0	0	0	tgaagctc	0	0	0	0	0
0	0	0	tgaagctg	0	0	0	0	0
0	0	0	tgaaggaa	0	0	0	0	0
0	0	0	tgaaggac	0	0	0	0	0
0	0	0	tgaaggag	0	0	0	0	0
0	0	0	tgaagtac	0	0	0	0	0
0	0	0	tgaagtag	0	0	0	0	0
0	0	0	tgacaact	0	0	0	0	0
0	0	0	tgacaaga	0	0	0	0	0
0	0	0	tgacacca	0	0	0	0	0
0	0	0	tgacatct	0	0	0	0	0
0	0	0	tgaccacc	0	0	0	0	0
0	0	0	tgaccaga	0	0	0	0	0
0	0	0	tgaccagc	0	0	0	0	0
0	0	0	tgaccagt	0	0	0	0	0
0	0	0	tgaccatc	0	0	0	0	0
0	0	0	tgacccag	0	0	0	0	0
0	0	0	tgacccga	0	0	0	0	0
0	0	0	tgaccgga	0	0	0	0	0
0	0	0	tgacctga	0	0	0	0	0
0	0	0	tgacctgc	0	0	0	0	0
0	0	0	tgacctgt	0	0	0	0	0
0	0	0	tgacgaac	0	0	0	0	0
0	0	0	tgacgaca	0	0	0	0	0
0	0	0	tgacgacc	0	0	0	0	0
0	0	0	tgacgaga	0	0	0	0	0
0	0	0	tgacgatc	0	0	0	0	0
0	0	0	tgacggct	0	0	0	0	0
0	0	0	tgacgtga	0	0	0	0	0
0	0	0	tgacgtgc	0	0	0	0	0
0	0	0	tgagaaac	0	0	0	0	0
0	0	0	tgagaaga	0	0	0	0	0
0	0	0	tgagaagc	0	0	0	0	0
0	0	0	tgagcacc	0	0	0	0	0
0	0	0	tgagcagc	0	0	0	0	0
0	0	0	tgagcatc	0	0	0	0	0
0	0	0	tgaggaac	0	0	0	0	0
0	0	0	tgaggaag	0	0	0	0	0
0	0	0	tgaggacc	0	0	0	0	0
0	0	0	tgaggagc	0	0	0	0	0
0	0	0	tgaggatc	0	0	0	0	0
0	0	0	tgaggcac	0	0	0	0	0
0	0	0	tgaggtac	0	0	0	0	0
0	0	0	tgagtacc	0	0	0	0	0
0	0	0	tgagttgc	0	0	0	0	0
0	0	0	tgatcctg	0	0	0	0	0
0	0	0	tgcaagga	0	0	0	0	0
0	0	0	tgcacctg	0	0	0	0	0
0	0	0	tgcagaag	0	0	0	0	0
0	0	0	tgcagaga	0	0	0	0	0
0	0	0	tgcagctg	0	0	0	0	0
0	0	0	tgcatctg	0	0	0	0	0
0	0	0	tgccacaa	0	0	0	0	0
0	0	0	tgccacag	0	0	0	0	0
0	0	0	tgccctga	0	0	0	0	0
0	0	0	tgccctgc	0	0	0	0	0
0	0	0	tgccgagt	0	0	0	0	0
0	0	0	tgccggca	0	0	0	0	0
0	0	0	tgcctctg	0	0	0	0	0
0	0	0	tgcctgag	0	0	0	0	0
0	0	0	tgcgaacc	0	0	0	0	0
0	0	0	tgcgaaga	0	0	0	0	0
0	0	0	tgcgacac	0	0	0	0	0
0	0	0	tgcgacca	0	0	0	0	0
0	0	0	tgcggaac	0	0	0	0	0
0	0	0	tgcggaat	0	0	0	0	0
0	0	0	tgcggaga	0	0	0	0	0
0	0	0	tgcggtgt	0	0	0	0	0
0	0	0	tgctctgc	0	0	0	0	0
0	0	0	tgctctgg	0	0	0	0	0
0	0	0	tgctcttc	0	0	0	0	0
0	0	0	tgctgaag	0	0	0	0	0
0	0	0	tgctgctg	0	0	0	0	0
0	0	0	tgctgtag	0	0	0	0	0
0	0	0	tgctgtgc	0	0	0	0	0
0	0	0	tgctgttg	0	0	0	0	0
0	0	0	tggaccct	0	0	0	0	0
0	0	0	tggaccgt	0	0	0	0	0
0	0	0	tggacctg	0	0	0	0	0
0	0	0	tggactct	0	0	0	0	0
0	0	0	tggactgt	0	0	0	0	0
0	0	0	tggagaac	0	0	0	0	0
0	0	0	tggagaag	0	0	0	0	0
0	0	0	tggagcac	0	0	0	0	0
0	0	0	tggagctt	0	0	0	0	0
0	0	0	tggaggac	0	0	0	0	0
0	0	0	tggaggag	0	0	0	0	0
0	0	0	tggatcca	0	0	0	0	0
0	0	0	tggcagca	0	0	0	0	0
0	0	0	tggccctg	0	0	0	0	0
0	0	0	tggccgac	0	0	0	0	0
0	0	0	tggcgagt	0	0	0	0	0
0	0	0	tggcggac	0	0	0	0	0
0	0	0	tggctgtc	0	0	0	0	0
0	0	0	tgggaacc	0	0	0	0	0
0	0	0	tgggacac	0	0	0	0	0
0	0	0	tggtcacc	0	0	0	0	0
0	0	0	tggtgaag	0	0	0	0	0
0	0	0	tgtacacc	0	0	0	0	0
0	0	0	tgtcctac	0	0	0	0	0
0	0	0	tgtcctga	0	0	0	0	0
0	0	0	tgtcctgc	0	0	0	0	0
0	0	0	tgtcgtga	0	0	0	0	0
0	0	0	tgtgacca	0	0	0	0	0
0	0	0	tgtgagga	0	0	0	0	0
0	0	0	tgtgcacc	0	0	0	0	0
[truncated: 61 more rows]

## Sheet: RESCUE-ES set
AAAACC
AAAAGA
AAAAGC
AAACAG
AAACCA
AAACCT
AAACGA
AAAGAA
AAAGAC								Reference:
AAAGAG								Science. 2002 Aug 9;297(5583):1007-13. Epub 2002 Jul 11. Links Predictive identification of exonic splicing enhancers in human genes. Fairbrother WG, Yeh RF, Sharp PA, Burge CB. Department of Biology, Center for Cancer Research, Massachusetts Institute of Technology, Cambridge, MA 02139, USA. Specific short oligonucleotide sequences that enhance pre-mRNA splicing when present in exons, termed exo…
AAAGAT
AAAGCA
AAAGCT
AAAGGA
AAATCC
AACAAC
AACAAG
AACAGA
AACCAA
AACGAA
AACTGG
AACTTC
AAGAAA
AAGAAC
AAGAAG
AAGAAT
AAGACA
AAGACT
AAGAGA
AAGAGG
AAGATC
AAGATG
AAGCAA
AAGCAG
AAGCCA
AAGCTA
AAGGAA
AAGGAC
AAGGAT
AATCAA
AATCCA
AATGAC
AATGGA
ACAAAG
ACAACG
ACAACT
ACAAGA
ACAGAA
ACCTGA
ACGAAA
ACGAAG
ACGACT
ACTGAA
ACTTCA
ACTTCG
AGAAAA
AGAAAC
AGAAAG
AGAACA
AGAACT
AGAAGA
AGAAGC
AGAAGG
AGAAGT
AGAATG
AGACAA
AGACAT
AGACGA
AGAGAA
AGAGAT
AGAGGA
AGATGA
AGATGC
AGATGT
AGCAAA
AGCAGA
AGGAAA
AGGAAC
AGGAAG
AGGACA
AGGAGA
AGTGAA
ATCAAA
ATCAAG
ATCAAT
ATCAGA
ATCCAA
ATGAAG
ATGAGA
ATGATG
ATGCAA
ATGGAA
ATGGCG
ATTCAG
ATTGGA
CAAAAC
CAAAAG
CAAAGA
CAACTT
CAAGAA
CAAGAT
CAAGTA
CAATCA
CAGAAA
CAGAAG
CAGAAT
CAGAGG
CAGGAA
CCTGAA
CGAAAA
CGAACA
CGAAGA
CGACGA
CGTATG
CTGAAA
CTGAAG
CTTCAG
GAAAAA
GAAAAC
GAAAAG
GAAACA
GAAACC
GAAACG
GAAACT
GAAAGA
GAAAGC
GAAATC
GAACAA
GAACAT
GAACTG
GAACTT
GAAGAA
GAAGAC
GAAGAG
GAAGAT
GAAGCA
GAAGGA
GAAGTA
GAAGTT
GAATCA
GACAAA
GACAAT
GACGAA
GACGAC
GAGAAA
GAGAAG
GAGAGA
GAGATG
GAGGAA
GAGGAG
GAGGAT
GATATC
GATATG
GATCAA
GATCAT
GATGAA
GATGAG
GATGAT
GATGCA
GATGGA
GATTCA
GCAAAA
GCAAGA
GCAGAA
GGAAAA
GGAAAC
GGAAGA
GGAGAA
GGAGGA
GGATCA
GTCAAG
GTGAAG
TACAAG
TACAGA
TATGGA
TCAAGA
TCAGAA
TCAGGA
TGAAAC
TGAAAG
TGAAGA
TGAAGC
TGAAGG
TGAAGT
TGAGAA
TGATGA
TGCAAC
TGGAAA
TGGAAG
TGGAAT
TGGATC
TTCAGA
TTCGAA
TTGAAG
TTGCGA
TTGGAA
TTGGAT
TTTGGA
AAAAAG
AAACTC
AACATG
AACCAG
AACTAC
AAGGAG
AATACG
AATCAG
AATGAA
ACATGA
ACGCAA
ACTACA
ACTGGA
AGTGAC
ATCTTC
ATGAAA
ATGGAT
ATGGTC
CAAACA
CAGATC
CATCAG
CGAATG
CGTCGC
CTACAT
CTCCAT
GAAAAT
GAACCA
GCGAAT
GGAGAT
GTCGAC
GTGTCG
GTTGGA
TATGAA
TCAACG
TCATCA
TCGTCG
TCTTCA
TGACTG
TGGAAC
TGTGGA

## Sheet: FAS-ESS (Hex-2) set
AAGGGG
AAGTGA
AAGTTT
AATGGG
ACTAGG
AGATGG
AGATTA
AGCCGG
AGGGGG								Reference:
AGGGGT								Cell. 2004 Dec 17;119(6):831-45. Links Comment in: Cell. 2004 Dec 17;119(6):736-8. Systematic identification and analysis of exonic splicing silencers. Wang Z, Rolish ME, Yeo G, Tung V, Mawson M, Burge CB. Department of Biology, Massachusetts Institute of Technology, Cambridge, MA 02139, USA. Exonic splicing silencers (ESSs) are cis-regulatory elements that inhibit the use of adjacent splice site…
AGGGTA
AGGGTG
AGGGTT
AGGTAA
AGGTAG
AGGTAT
AGGTGG
AGGTTA
AGGTTT
AGTAGG
AGTATA
AGTCCG
AGTCGT
AGTGTA
AGTGTT
AGTTAG
AGTTCG
AGTTCT
AGTTGT
AGTTTA
AGTTTC
AGTTTG
AGTTTT
ATAGGG
ATAGTT
ATGGGG
ATTAGG
CCAAGG
CCACTA
CCGTTC
CCTGGG
CGGGGG
CGTAGG
CGTTCA
CGTTCC
CGTTCG
CGTTCT
CTAGGG
CTAGGT
CTTAGG
CTTAGT
CTTGGG
GATAGG
GATGGG
GATTAG
GCTTAG
GGAGGG
GGATGG
GGCTTA
GGGAGG
GGGATG
GGGGAG
GGGGAT
GGGGGA
GGGGGG
GGGGGT
GGGGTA
GGGGTG
GGGGTT
GGGTAA
GGGTAG
GGGTGG
GGGTGT
GGGTTA
GGGTTG
GGGTTT
GGTAAG
GGTAGG
GGTAGT
GGTATA
GGTGGG
GGTGTG
GGTTAG
GGTTAT
GGTTGG
GGTTTA
GGTTTG
GGTTTT
GTAAGG
GTAAGT
GTAGGG
GTAGGT
GTAGTT
GTATAG
GTCCGT
GTCGTT
GTGGCA
GTGGGG
GTGGGT
GTGGTT
GTGTAG
GTGTGG
GTGTTA
GTTAGG
GTTAGT
GTTCCG
GTTCCT
GTTCGT
GTTCTA
GTTCTG
GTTGGG
GTTGTT
GTTTAG
GTTTCC
GTTTCT
GTTTGG
GTTTGT
GTTTTG
GTTTTT
TAAGTG
TAAGTT
TAATGG
TACTAG
TAGGGG
TAGGGT
TAGGTA
TAGGTT
TAGTAT
TAGTGG
TAGTGT
TAGTTA
TAGTTT
TATAGG
TATGGG
TCCGTT
TCCTGG
TCGTTC
TCTAGG
TGGGAG
TGGGGA
TGGGGG
TGGGGT
TGGGTG
TGGTGG
TGTAGG
TGTAGT
TGTTAG
TGTTCC
TGTTTC
TTAGAT
TTAGGG
TTAGGT
TTAGTA
TTAGTG
TTAGTT
TTATGG
TTCCGT
TTCCTG
TTCCTT
TTCGTA
TTCGTT
TTCTAG
TTCTGT
TTGGGG
TTGTTA
TTGTTC
TTGTTG
TTGTTT
TTTACC
TTTAGG
TTTAGT
TTTCTA
TTTGGG
TTTGTT
TTTTAG
TTTTGG

## Sheet: FAS-ESS (Hex-3) set
ACTAGG
AGGGGG
AGGGGT
AGGGTA
AGGGTG
AGGGTT
AGGTAA
AGGTAG
AGGTAT								Reference:
AGGTTA								Cell. 2004 Dec 17;119(6):831-45. Links Comment in: Cell. 2004 Dec 17;119(6):736-8. Systematic identification and analysis of exonic splicing silencers. Wang Z, Rolish ME, Yeo G, Tung V, Mawson M, Burge CB. Department of Biology, Massachusetts Institute of Technology, Cambridge, MA 02139, USA. Exonic splicing silencers (ESSs) are cis-regulatory elements that inhibit the use of adjacent splice site…
AGGTTT
AGTAGG
AGTCGT
AGTGTA
AGTGTT
AGTTAG
AGTTCG
AGTTCT
AGTTGT
AGTTTA
AGTTTG
ATGGGG
CCTGGG
CGTTCC
CTAGGG
CTTAGG
GATGGG
GGATGG
GGGAGG
GGGATG
GGGGAG
GGGGAT
GGGGGA
GGGGGG
GGGGGT
GGGGTA
GGGGTG
GGGGTT
GGGTAA
GGGTAG
GGGTGG
GGGTTA
GGGTTT
GGTAAG
GGTAGG
GGTAGT
GGTATA
GGTGGG
GGTTAG
GGTTTA
GGTTTG
GGTTTT
GTAAGG
GTAAGT
GTAGGG
GTAGGT
GTAGTT
GTATAG
GTCGTT
GTGGGG
GTGGGT
GTGTAG
GTTAGG
GTTAGT
GTTCCT
GTTCGT
GTTCTG
GTTGTT
GTTTAG
GTTTGG
GTTTGT
TAAGTG
TAGGGG
TAGGGT
TAGGTA
TAGGTT
TAGTGG
TAGTGT
TAGTTA
TAGTTT
TATAGG
TCCTGG
TCGTTC
TCTAGG
TGGGGG
TGGGTG
TGGTGG
TGTTAG
TGTTCC
TTAGGG
TTAGGT
TTAGTG
TTAGTT
TTCCTG
TTCGTT
TTCTAG
TTGGGG
TTGTTC
TTTAGG
TTTAGT
TTTGGG
TTTGTT
TTTTGG

## Sheet: PESE + PESS set 1
aaaaaaaa	-4.3231	-5.252	aaaaaaaa		aaaaaaaa
aaaaaaac	-2.5278	-3.5313
aaaaaaag	0.0991	-1.918
aaaaaaat	-4.9083	-4.7147	aaaaaaat		aaaaaaat
aaaaaaca	-3.1298	-3.5631	aaaaaaca		aaaaaaca
aaaaaacc	0.5675	-1.1344
aaaaaacg	1.0263	-0.4068
aaaaaact	-2.645	-2.0787
aaaaaaga	0.4354	-0.6144						Reference:
aaaaaagc	0.8503	-0.8906						Genes Dev. 2004 Jun 1;18(11):1241-50. Epub 2004 May 14. Links Computational definition of sequence motifs governing constitutive exon splicing. Zhang XH, Chasin LA. Department of Biological Sciences, MC2433, Columbia University, New York, New York 10027, USA. We have searched for sequence motifs that contribute to the recognition of human pre-mRNA splice sites by comparing the frequency of 8-mers…
aaaaaagg	1.7318	-0.0205
aaaaaagt	-1.506	-1.091
aaaaaata	-5.6244	-3.91	aaaaaata		aaaaaata
aaaaaatc	-1.9983	-1.0068
aaaaaatg	-4.0662	-3.306	aaaaaatg		aaaaaatg
aaaaaatt	-3.1387	-1.11
aaaaacaa	-1.5278	-2.1513
aaaaacac	-2.9109	-1.5874
aaaaacag	-0.0956	0.8032
aaaaacat	-2.824	-0.9032
aaaaacca	0.6153	-0.4128
aaaaaccc	1.9935	0.2706
aaaaaccg	1.4184	-0.5602
aaaaacct	1.0675	0.8451
aaaaacga	0.9855	0.8246
aaaaacgc	1.6853	0.2424
aaaaacgg	0.4041	-0.2667
aaaaacgt	-0.5452	-1.3537
aaaaacta	-2.5484	-1.2616
aaaaactc	-0.2008	-0.9687
aaaaactg	-0.4916	-0.5571
aaaaactt	-1.7328	-1.1225
aaaaagaa	2.236	1.2542
aaaaagac	1.8348	1.3678
aaaaagag	1.3485	1.8159
aaaaagat	-0.5261	-0.1225
aaaaagca	1.8105	2.6354
aaaaagcc	2.2389	-0.0662
aaaaagcg	1.7059	-0.8171
aaaaagct	-1.109	-2.2464
aaaaagga	4.372	3.5504	aaaaagga	aaaaagga
aaaaaggc	-0.2085	-2.4788
aaaaaggg	-0.191	-1.3702
aaaaaggt	-3.8769	-4.2348	aaaaaggt		aaaaaggt
aaaaagta	-0.8315	0.8004
aaaaagtc	-0.8253	-1.7252
aaaaagtg	-1.2038	-0.6208
aaaaagtt	-3.433	-3.4358	aaaaagtt		aaaaagtt
aaaaataa	-5.0058	-3.2649	aaaaataa		aaaaataa
aaaaatac	-3.0417	-1.8937
aaaaatag	-4.5648	-3.0565	aaaaatag		aaaaatag
aaaaatat	-5.5935	-2.8697	aaaaatat		aaaaatat
aaaaatca	-1.2346	1.0196
aaaaatcc	-0.7841	-0.3328
aaaaatcg	0.6861	1.5729
aaaaatct	-2.3704	-0.9648
aaaaatga	-3.1109	-2.3394
aaaaatgc	-3.092	-3.2218	aaaaatgc		aaaaatgc
aaaaatgg	-2.8953	-1.6319
aaaaatgt	-5.0153	-3.7328	aaaaatgt		aaaaatgt
aaaaatta	-3.9892	-1.473
aaaaattc	-1.884	-0.4657
aaaaattg	-2.2145	-0.296
aaaaattt	-5.7394	-1.5855
aaaacaaa	-2.2607	-3.0265
aaaacaac	-0.067	-0.1082
aaaacaag	1.8282	1.0844
aaaacaat	-1.8398	-1.8521
aaaacaca	-1.9178	-0.7708
aaaacacc	0.1237	1.0575
aaaacacg	0.3953	-0.7943
aaaacact	-0.1958	-0.7522
aaaacaga	0.5325	1.9447
aaaacagc	1.9605	0.963
aaaacagg	-0.1073	-0.4333
aaaacagt	-0.6675	-0.1479
aaaacata	-3.6749	-1.6675
aaaacatc	0.9537	0.7836
aaaacatg	-1.955	-1.9031
aaaacatt	-1.2928	-0.8994
aaaaccaa	0.4717	1.243
aaaaccac	2.2329	1.7726
aaaaccag	1.5615	-0.4477
aaaaccat	0.3973	-0.733
aaaaccca	-0.2658	0.1129
aaaacccc	3.4848	2.1966
aaaacccg	3.8695	1.3097
aaaaccct	0.9003	0.3276
aaaaccga	-0.0986	-1.2008
aaaaccgc	1.6651	0.4059
aaaaccgg	2.9646	0.9963
aaaaccgt	0.0727	-1.2008
aaaaccta	-0.5262	-0.8267
aaaacctc	0.4077	-0.8967
aaaacctg	2.9062	1.6579
aaaacctt	0.1502	-1.0222
aaaacgaa	0.5363	1.1477
aaaacgac	2.4087	1.377
aaaacgag	1.4709	2.1906
aaaacgat	-0.7066	-1.0629
aaaacgca	0.3724	0.4027
aaaacgcc	3.1318	1.1658
aaaacgcg	2.2185	0.4649
aaaacgct	1.2001	0.1563
aaaacgga	0.5313	-0.3441
aaaacggc	2.6542	1.1537
aaaacggg	0.1814	-0.161
aaaacggt	0.0202	-1.8119
aaaacgta	-2.2211	-1.6474
aaaacgtc	1.331	0.5464
aaaacgtg	1.0058	-1.0287
aaaacgtt	-2.1493	-2.5654
aaaactaa	-3.2659	-2.5722
aaaactac	0.0519	0.5456
aaaactag	-1.9393	-1.8812
aaaactat	-2.8655	-2.219
aaaactca	-1.8086	-1.8508
aaaactcc	0.5521	2.2709
aaaactcg	-0.7714	-1.6497
aaaactct	-0.067	0.57
aaaactga	-0.1942	-0.5087
aaaactgc	0.4748	-0.6106
aaaactgg	1.1008	2.7391
aaaactgt	-2.0189	-2.294
aaaactta	-4.0108	-1.8279
aaaacttc	0.7606	1.2315
aaaacttg	-0.06	-0.0425
aaaacttt	-2.7358	-2.2542
aaaagaaa	1.0704	0.6572
aaaagaac	1.8348	1.9821
aaaagaag	5.0162	3.1248	aaaagaag	aaaagaag
aaaagaat	0.4389	2.9629
aaaagaca	0.8226	0.6293
aaaagacc	2.0373	1.0102
aaaagacg	4.1473	0.8586
aaaagact	0.8126	1.385
aaaagaga	2.4708	2.2701
aaaagagc	1.7478	1.4112
aaaagagg	3.7682	2.2484
aaaagagt	-0.6148	-0.2817
aaaagata	-0.7783	0.9462
aaaagatc	1.8477	2.7364
aaaagatg	-0.7486	-1.4043
aaaagatt	-1.3413	-0.3477
aaaagcaa	2.0548	1.5175
aaaagcac	1.0317	-0.0394
aaaagcag	1.8058	-0.0523
aaaagcat	-0.8823	0.5927
aaaagcca	3.3945	1.8371
aaaagccc	1.5291	0.0904
aaaagccg	3.0801	-0.7445
aaaagcct	2.2962	-0.7708
aaaagcga	1.7673	0.1946
aaaagcgc	0.7987	-0.913
aaaagcgg	4.3219	1.728
aaaagcgt	-0.8905	-0.6996
aaaagcta	-0.2227	0.104
aaaagctc	0.9644	0.4138
aaaagctg	1.4997	0.1523
aaaagctt	-1.3903	-0.9231
aaaaggaa	4.6116	3.2437	aaaaggaa	aaaaggaa
aaaaggac	2.4274	1.0396
aaaaggag	3.7577	2.5847
aaaaggat	-1.881	-0.8505
aaaaggca	-0.0871	-1.2318
aaaaggcc	2.5492	0.6392
aaaaggcg	2.0478	-0.7707
aaaaggct	-1.5761	-2.3027
aaaaggga	-0.5529	-0.91
aaaagggc	-0.6996	-2.4565
aaaagggg	-0.8637	-0.7272
aaaagggt	-1.5983	-2.3653
aaaaggta	-2.7175	-2.3392
aaaaggtc	-0.0423	-2.2615
aaaaggtg	-0.5989	-2.0959
aaaaggtt	-2.8523	-1.9053
aaaagtaa	-1.856	-0.993
aaaagtac	-2.0558	-0.3553
aaaagtag	-1.8886	-0.5743
aaaagtat	-3.3073	-1.7802
aaaagtca	-1.6192	-0.3068
aaaagtcc	0.5364	0.1029
aaaagtcg	1.6464	1.449
aaaagtct	-1.2894	-0.4396
aaaagtga	1.3723	2.2899
aaaagtgc	-3.07	-0.8971
aaaagtgg	0.7795	2.2796
aaaagtgt	-2.1413	1.067
aaaagtta	-2.142	0.7382
aaaagttc	-1.6001	-0.3734
aaaagttg	-1.4795	-0.6941
aaaagttt	-2.7972	0.1539
aaaataaa	-3.7301	-2.8246	aaaataaa		aaaataaa
aaaataac	-3.4552	-2.4682
aaaataag	-0.874	-0.0368
aaaataat	-3.6696	-0.3548
aaaataca	-3.5506	-1.0358
aaaatacc	-1.1058	-0.4933
aaaatacg	-0.5067	0.4041
aaaatact	-3.4958	-1.8166
aaaataga	-3.5798	-0.8154
aaaatagc	-2.3348	-0.9571
aaaatagg	-0.842	0.4942
aaaatagt	-3.0662	-1.1819
aaaatata	-5.686	-2.1766
aaaatatc	-4.1885	-2.7124	aaaatatc		aaaatatc
aaaatatg	-3.9214	-1.7994
aaaatatt	-4.5921	-0.3917
aaaatcaa	-2.9855	-1.03
aaaatcac	-0.8617	-0.8684
aaaatcag	-0.9499	-0.0662
aaaatcat	-0.0033	0.8418
aaaatcca	-0.9893	-0.5324
aaaatccc	-0.4308	-1.2009
aaaatccg	1.6853	0.088
aaaatcct	-1.6763	-0.1489
aaaatcga	-0.7551	0.6897
aaaatcgc	-0.5486	-0.4732
aaaatcgg	0.7178	-0.0284
aaaatcgt	0.6629	0.4027
aaaatcta	-3.4783	-0.8352
aaaatctc	0.5216	0.548
aaaatctg	0.6349	1.2383
aaaatctt	-2.1323	-0.3806
aaaatgaa	-2.0586	-0.0106
aaaatgac	-2.1527	-1.4312
aaaatgag	-1.3997	-0.5263
aaaatgat	-4.0268	-2.686	aaaatgat		aaaatgat
aaaatgca	-4.102	-3.1587	aaaatgca		aaaatgca
aaaatgcc	-2.7011	-2.5371
aaaatgcg	-1.1762	-0.6886
aaaatgct	-5.3501	-3.2065	aaaatgct		aaaatgct
aaaatgga	-2.4778	-1.3529
aaaatggc	-1.8943	-2.3823
aaaatggg	-2.449	-0.9196
aaaatggt	-4.0046	-2.8387	aaaatggt		aaaatggt
aaaatgta	-4.9847	-3.2411	aaaatgta		aaaatgta
aaaatgtc	-3.2774	-2.6548	aaaatgtc		aaaatgtc
aaaatgtg	-3.2996	-1.8712
aaaatgtt	-5.0898	-3.6561	aaaatgtt		aaaatgtt
aaaattaa	-4.2688	-2.1186
aaaattac	-0.9864	-0.7139
aaaattag	-3.2009	-1.6181
aaaattat	-3.6917	-1.8055
aaaattca	-2.7362	-1.5922
aaaattcc	-0.9172	-1.0933
aaaattcg	-0.5427	-0.092
aaaattct	-1.753	0.5956
aaaattga	-0.9176	0.4005
aaaattgc	0.1431	0.148
aaaattgg	0.638	1.3079
aaaattgt	-1.5903	0.7289
aaaattta	-5.7902	-0.8657
aaaatttc	-2.0215	-1.263
aaaatttg	-3.0299	-0.8076
aaaatttt	-4.0742	-1.3282
aaacaaaa	-2.9903	-3.8721	aaacaaaa		aaacaaaa
aaacaaac	-0.4004	-0.1436
aaacaaag	-0.0059	0.1071
aaacaaat	-3.113	-1.5378
aaacaaca	0.3946	1.0589
aaacaacc	1.4991	0.52
aaacaacg	-0.1492	-0.384
aaacaact	-1.9253	-1.4652
aaacaaga	0.4873	0.5992
aaacaagc	2.3953	1.4309
aaacaagg	0.0927	0.4031
aaacaagt	-1.2295	-1.1392
aaacaata	-3.8168	-2.2201
aaacaatc	0.5787	1.5622
aaacaatg	-2.7626	-1.8051
aaacaatt	-2.6545	-1.4511
aaacacaa	-1.7027	-0.2952
aaacacac	-1.8718	-1.5073
aaacacag	-1.7117	-0.8007
aaacacat	-1.7727	-1.0241
aaacacca	2.5554	2.6797
aaacaccc	3.1796	1.6315
aaacaccg	-1.3614	0.2468
aaacacct	0.1843	1.6598
aaacacga	0.9681	0.7014
aaacacgc	1.1469	-0.2416
aaacacgg	-0.5386	-0.4291
aaacacgt	-0.5079	-0.6688
aaacacta	-1.6159	-1.3238
aaacactc	0.1779	0.3281
aaacactg	-0.5665	-0.0432
aaacactt	-0.6694	0.3835
aaacagaa	2.7265	3.1448	aaacagaa	aaacagaa
aaacagac	2.4451	3.8141
aaacagag	1.644	3.6153
aaacagat	-0.6341	-0.3875
aaacagca	3.6708	4.0671	aaacagca	aaacagca
aaacagcc	1.9006	-0.1091
aaacagcg	0.1303	1.0761
aaacagct	-1.4544	-0.9589
aaacagga	2.0802	2.8749
aaacaggc	1.0317	0.5593
aaacaggg	-2.2546	-0.959
aaacaggt	-2.5403	-2.3376
aaacagta	-0.2979	0.2691
aaacagtc	0.6726	0.9658
aaacagtg	-1.29	0.9299
aaacagtt	-2.2111	-2.5955
aaacataa	-2.9981	-1.8211
aaacatac	-1.7319	-0.7755
aaacatag	-2.9413	-0.656
aaacatat	-3.4783	-2.4378
aaacatca	-0.0415	1.4072
aaacatcc	1.7318	1.9196
aaacatcg	-0.0323	1.6885
aaacatct	-0.5715	1.073
aaacatga	-1.9405	-0.731
aaacatgc	-0.462	-1.6725
aaacatgg	-2.6388	-0.8278
aaacatgt	-3.765	-3.3124	aaacatgt		aaacatgt
aaacatta	-2.5365	-0.1791
aaacattc	-0.1554	1.0438
aaacattg	-0.3661	1.8711
aaacattt	-4.296	-2.4813
aaaccaaa	1.1958	0.7072
aaaccaac	2.5167	1.3932
aaaccaag	1.8285	1.2051
aaaccaat	-1.1597	-1.2432
aaaccaca	0.9342	-0.5119
aaaccacc	3.5698	-0.0863
aaaccacg	2.9081	0.3561
aaaccact	0.9855	-0.0194
aaaccaga	2.5554	0.7007
aaaccagc	3.8674	1.9136
aaaccagg	2.7373	0.314
aaaccagt	1.5615	1.6042
aaaccata	-0.8269	-0.6761
aaaccatc	1.2229	1.2024
aaaccatg	1.1881	1.3776
aaaccatt	-1.1001	-1.0812
aaacccaa	-0.0027	0.0255
aaacccac	2.2557	0.104
aaacccag	0.2731	2.6229
aaacccat	0.3302	0.1283
aaacccca	1.7478	0.7663
aaaccccc	2.6251	0.5343
aaaccccg	2.0079	0.7834
aaacccct	-1.1913	-0.4315
aaacccga	1.2456	0.1975
aaacccgc	4.502	0.034
aaacccgg	5.6787	2.1062
aaacccgt	0.8058	-0.5747
aaacccta	-0.069	-0.6661
aaaccctc	2.277	0.5818
aaaccctg	2.9432	1.3387
aaaccctt	-1.1065	-1.3081
aaaccgaa	3.3376	0.7057
aaaccgac	3.1318	2.5348
aaaccgag	2.1445	1.5817
aaaccgat	-1.0405	-1.8625
aaaccgca	0.8744	-1.0329
aaaccgcc	4.903	0.8517
aaaccgcg	1.1206	-1.486
aaaccgct	-0.4025	-0.8316
aaaccgga	3.4429	1.0614
aaaccggc	4.1796	-0.1656
aaaccggg	1.832	0.173
aaaccggt	2.1039	0.7253
aaaccgta	-0.91	-1.9645
aaaccgtc	0.5406	-0.4855
aaaccgtg	1.8973	0.8883
aaaccgtt	-1.6321	-2.6436
aaacctaa	-1.1065	-1.4109
aaacctac	1.3729	1.1844
aaacctag	-1.3605	-1.0582
aaacctat	-2.0418	-1.6878
aaacctca	0.2193	-0.7428
aaacctcc	2	1.127
aaacctcg	2.8754	0.6241
aaacctct	0.9211	-0.1976
aaacctga	1.0445	-0.0453
aaacctgc	5.0741	3.5012	aaacctgc	aaacctgc
aaacctgg	2.657	1.2557
aaacctgt	0.5638	0.6704
aaacctta	-2.6262	-3.0223	aaacctta		aaacctta
aaaccttc	2.0261	1.0139
aaaccttg	2.1151	1.0621
aaaccttt	-3.5883	-3.882	aaaccttt		aaaccttt
aaacgaaa	0.7585	0.3729
aaacgaac	-1.0101	-0.9638
aaacgaag	1.8135	0.9943
aaacgaat	-0.2212	1.8533
aaacgaca	1.3744	-0.5602
aaacgacc	3.2904	-0.4121
aaacgacg	1.7648	-1.1649
aaacgact	3.0801	2.3153
aaacgaga	1.6953	0.3778
aaacgagc	1.3598	-0.0249
aaacgagg	3.8426	1.4636
aaacgagt	0.9554	2.5063
aaacgata	-1.1302	-0.0209
aaacgatc	1.7727	2.6677
aaacgatg	-0.3267	-1.4714
aaacgatt	0.1629	0.451
aaacgcaa	3.1254	2.5871
aaacgcac	0.7987	-0.4639
aaacgcag	-0.122	-2.1391
aaacgcat	-0.1956	0.2779
aaacgcca	0.9397	0.2424
aaacgccc	3.4117	-0.0966
aaacgccg	2.6557	-0.6577
aaacgcct	-1.1386	-0.1312
aaacgcga	2.0232	0.1808
aaacgcgc	2.1477	-0.6729
aaacgcgg	1.5203	-0.4349
aaacgcgt	0.3823	-0.3934
aaacgcta	0.948	0.0821
aaacgctc	1.9926	0.7698
aaacgctg	1.1723	1.0257
aaacgctt	-0.8182	-1.2013
aaacggaa	1.0877	-0.0158
aaacggac	3.591	1.8921
aaacggag	3.6243	3.1223	aaacggag	aaacggag
aaacggat	1.0382	0.4224
aaacggca	1.3439	1.1089
aaacggcc	1.9229	-0.1394
aaacggcg	0.1976	-1.6509
aaacggct	2.3379	0.4595
aaacggga	0.7139	0.6473
aaacgggc	1.7142	-0.3593
aaacgggg	-0.4818	0.5228
aaacgggt	-0.584	-1.1216
aaacggta	-0.0441	-0.4732
aaacggtc	0.0208	-1.6684
aaacggtg	0.3423	-0.8828
aaacggtt	-0.6102	-1.0433
aaacgtaa	-1.1887	-0.9881
aaacgtac	-2.0264	-0.7873
aaacgtag	-1.4283	-0.759
aaacgtat	-2.0633	-1.62
aaacgtca	1.1621	0.5464
aaacgtcc	-0.1288	-1.3082
aaacgtcg	0.2934	0.0357
aaacgtct	-0.0735	0.0044
aaacgtga	1.5497	0.7679
aaacgtgc	1.832	1.1089
aaacgtgg	1.6083	1.3224
aaacgtgt	-0.3141	0.0709
aaacgtta	-2.7623	-1.5533
aaacgttc	-0.1478	0.2066
aaacgttg	0.7422	1.1265
aaacgttt	-2.9391	-2.4009
aaactaaa	-3.2068	-2.6034
aaactaac	-1.3379	-1.2794
aaactaag	0.7742	1.2296
aaactaat	-2.638	-1.951
aaactaca	1.5123	0.3359
aaactacc	-0.4853	-0.7977
aaactacg	1.3598	-0.2416
aaactact	-1.1193	-0.5074
aaactaga	0.54	1.3728
aaactagc	-0.5386	-1.6642
aaactagg	-1.4906	-1.9728
aaactagt	-2.4221	-1.1735
aaactata	-2.9562	-1.5196
aaactatc	0.043	-0.9809
aaactatg	-1.9771	-1.8445
aaactatt	-2.6689	-1.5315
aaactcaa	0.3744	0.5235
aaactcac	-0.4471	-0.3416
aaactcag	-0.1017	-0.4645
aaactcat	-1.2611	0.5326
aaactcca	-0.359	1.6918
aaactccc	0.5735	0.4687
aaactccg	-0.8931	-0.4757
aaactcct	-4.2493	-0.4441
aaactcga	-0.3253	0.9539
aaactcgc	2.7132	0.9431
aaactcgg	1.0379	-0.2582
aaactcgt	-1.1569	-0.6959
aaactcta	0.4197	1.5053
aaactctc	0.7441	0.4402
aaactctg	2.0848	3.5551
aaactctt	-1.0765	-1.0823
aaactgaa	3.1311	2.8413	aaactgaa	aaactgaa
aaactgac	1.6957	0.3729
aaactgag	2.7083	2.2631
aaactgat	1.0444	0.5161
aaactgca	1.847	0.7872
aaactgcc	1.7665	0.8764
aaactgcg	2.9754	1.7042
aaactgct	-3.033	-0.3499
aaactgga	2.0848	1.6344
aaactggc	3.4065	2.5644
aaactggg	1.8557	1.4904
aaactggt	1.4694	0.5075
aaactgta	-0.8028	-0.6728
aaactgtc	1.4368	0.7674
aaactgtg	0.6302	0.2265
aaactgtt	-2.7918	-2.832	aaactgtt		aaactgtt
aaacttaa	-2.3887	-0.7038
aaacttac	-1.5556	-0.5989
aaacttag	-1.2197	0.236
aaacttat	-1.2793	-1.4551
aaacttca	0.3744	1.4808
aaacttcc	1.8518	0.5949
aaacttcg	2.0436	0.4538
aaacttct	-2.0656	-0.9598
aaacttga	0.7544	1.6918
aaacttgc	-0.7506	-0.274
aaacttgg	0.4748	1.3832
aaacttgt	-1.397	-1.8097
aaacttta	-3.3909	-1.4916
aaactttc	-1.6245	-1.1448
aaactttg	-1.0216	1.149
aaactttt	-3.2446	-1.824
aaagaaaa	0.7601	-1.2655
aaagaaac	3.6464	2.8101	aaagaaac	aaagaaac
aaagaaag	4.5434	3.4861	aaagaaag	aaagaaag
aaagaaat	0.6221	1.9447
aaagaaca	0.3221	0.6478
aaagaacc	2.855	1.856
aaagaacg	0.5957	0.3022
aaagaact	1.2088	1.1978
aaagaaga	6.3395	4.6375	aaagaaga	aaagaaga
aaagaagc	4.1311	1.9191
aaagaagg	5.0849	3.9323	aaagaagg	aaagaagg
aaagaagt	1.7834	2.0272
aaagaata	-0.8617	1.3492
aaagaatc	2.5395	2.3736
aaagaatg	-1.8607	-1.1968
aaagaatt	0.0257	2.3979
aaagacaa	1.2365	1.2578
aaagacac	2.0426	1.9759
aaagacag	-0.224	-0.0102
aaagacat	1.7991	1.2885
aaagacca	0.4873	0.8896
aaagaccc	2.6832	2.6336	aaagaccc	aaagaccc
aaagaccg	3.1391	0.6473
aaagacct	1.8593	1.0261
aaagacga	4.7191	2.7749	aaagacga	aaagacga
aaagacgc	3.9462	0.4538
aaagacgg	-0.0423	-1.4438
aaagacgt	0.7705	0.0662
aaagacta	2.3382	0.921
aaagactc	-0.2954	-1.3081
aaagactg	-1.0002	1.1079
aaagactt	0.75	-0.0205
aaagagaa	4.4934	5.6266	aaagagaa	aaagagaa
aaagagac	4.0626	3.6362	aaagagac	aaagagac
aaagagag	2.5975	0.6666
aaagagat	0.2929	0.5599
aaagagca	1.1483	2.5413
aaagagcc	0.5073	0.2585
aaagagcg	-0.5192	-0.1506
aaagagct	-4.0491	-2.0198
aaagagga	5.6342	6.4981	aaagagga	aaagagga
aaagaggc	3.0124	1.0722
aaagaggg	-0.4057	-0.5854
aaagaggt	-1.0186	-1.5215
aaagagta	-0.6757	1.4829
aaagagtc	0.3316	0.8114
aaagagtg	-0.2349	0.6451
aaagagtt	-2.1818	-1.0812
aaagataa	0.7182	1.4432
aaagatac	0.5685	0.6602
aaagatag	-0.8985	-0.5191
aaagatat	-2.4067	-1.0583
aaagatca	2.0115	4.4777
aaagatcc	2.9754	1.293
aaagatcg	1.5535	1.6394
aaagatct	-0.0669	1.472
aaagatga	1.7202	1.6052
aaagatgc	-0.2358	-1.8249
aaagatgg	-3.2405	-1.9809
aaagatgt	-2.9701	-2.4471
aaagatta	-0.8456	0.3875
aaagattc	2.6834	1.8636
aaagattg	-1.1465	1.4256
aaagattt	-1.5751	-0.5508
aaagcaaa	2.2427	1.5231
aaagcaac	3.788	1.7719
aaagcaag	3.8767	2.9969	aaagcaag	aaagcaag
aaagcaat	0.1021	1.4048
aaagcaca	0.1536	-0.3203
aaagcacc	0.8687	-0.9809
aaagcacg	2.6062	1.154
aaagcact	0.1356	-0.5212
aaagcaga	3.3795	1.9447
aaagcagc	2.7692	-0.1873
aaagcagg	1.9875	1.7209
aaagcagt	-0.7319	-0.3619
aaagcata	-0.286	0.1354
aaagcatc	2.0466	0.0079
aaagcatg	-1.2076	-0.0866
aaagcatt	-0.3548	-1.8187
aaagccaa	2.1207	1.7938
aaagccac	0.5507	-1.7067
aaagccag	2.8624	1.678
aaagccat	-0.7829	-1.3419
aaagccca	-0.0819	-1.0515
aaagcccc	1.4709	-0.2823
aaagcccg	1.3863	-0.0325
aaagccct	1.9104	0.7663
aaagccga	0.8806	0.4191
aaagccgc	5.7272	-0.72
aaagccgg	6.5481	1.7133
aaagccgt	1.9401	-0.3909
aaagccta	-1.4094	-1.862
aaagcctc	1.1728	-0.5561
aaagcctg	4.3509	2.106
aaagcctt	0.1237	-2.7524
aaagcgaa	2.2915	2.1985
aaagcgac	3.263	0.0762
aaagcgag	3.4544	1.5349
aaagcgat	-1.1887	0.0096
aaagcgca	-0.7289	0.5728
aaagcgcc	3.2824	-0.362
aaagcgcg	0.5361	-2.1855
aaagcgct	-2.8966	-1.9502
aaagcgga	3.8911	2.2353
aaagcggc	1.6478	-2.6165
aaagcggg	0.5838	-1.2901
aaagcggt	0.603	-0.8772
aaagcgta	-1.0418	-1.0146
aaagcgtc	1.5847	-1.4945
aaagcgtg	1.2756	1.5677
aaagcgtt	-1.2569	-2.9298
aaagctaa	-0.0883	1.1192
aaagctac	1.0605	0.6891
aaagctag	-0.4583	1.5562
aaagctat	-1.5182	-2.5186
aaagctca	-0.1147	0.7396
aaagctcc	2.2885	-0.4396
aaagctcg	3.714	2.1191
aaagctct	0.8179	0.0969
aaagctga	3.2585	3.2388	aaagctga	aaagctga
aaagctgc	1.4073	-0.2476
aaagctgg	0.1843	1.0763
aaagctgt	-1.1361	-1.3963
aaagctta	-0.4879	-1.5116
aaagcttc	-0.4238	-1.9914
aaagcttg	-0.3155	-0.9069
aaagcttt	-3.5811	-3.4323	aaagcttt		aaagcttt
aaaggaaa	1.9067	1.3591
aaaggaac	1.4334	3.1129
aaaggaag	5.443	3.4081	aaaggaag	aaaggaag
aaaggaat	-0.1703	1.7246
aaaggaca	0.5894	-0.2073
aaaggacc	2.6775	1.3242
aaaggacg	3.2725	1.4961
aaaggact	0.7186	1.3655
aaaggaga	5.2204	4.4626	aaaggaga	aaaggaga
aaaggagc	3.6843	1.3089
aaaggagg	3.2558	1.8583
aaaggagt	1.0495	3.1901
aaaggata	-1.1461	-0.426
aaaggatc	0.5649	0.5619
aaaggatg	-1.4601	0.0767
aaaggatt	0.0313	1.904
aaaggcaa	1.7741	0.3196
aaaggcac	-0.2793	-0.8051
aaaggcag	-0.0143	-1.4046
aaaggcat	-0.706	-0.3547
aaaggcca	-0.0363	-0.4623
aaaggccc	2.8683	0.0585
aaaggccg	2.4455	-0.3714
aaaggcct	-0.2576	-1.011
aaaggcga	1.6853	-1.0046
aaaggcgc	1.9382	0.2076
aaaggcgg	3.3376	0.6139
aaaggcgt	-1.9757	-1.6749
aaaggcta	-1.3631	-1.8196
aaaggctc	0.0143	-1.1897
aaaggctg	1.3732	-0.0067
aaaggctt	-1.4778	-1.4012
aaagggaa	1.6891	1.2616
aaagggac	0.0674	-0.3416
aaagggag	1.1441	0.5773
aaagggat	-1.5148	0.1826
aaagggca	-1.8813	-1.8485
aaagggcc	1.5695	-0.5331
aaagggcg	1.3598	-1.05
aaagggct	-2.8227	-1.4663
aaagggga	-0.0734	0.0791
aaaggggc	-0.676	-2.6657
aaaggggg	-0.6044	-1.7645
aaaggggt	-2.8269	-2.2553
aaagggta	-3.3091	-1.2563
aaagggtc	-0.3431	-0.9817
aaagggtg	-1.244	-1.4326
aaagggtt	-3.862	-2.4975
aaaggtaa	-2.6996	-1.5116
aaaggtac	0.0032	-0.7629
aaaggtag	-1.0938	-1.0738
aaaggtat	-3.4182	-1.7884
aaaggtca	-0.4405	-0.7132
aaaggtcc	0.8659	-0.5652
aaaggtcg	1.3008	-0.9638
aaaggtct	0.043	-0.0609
aaaggtga	1.6249	0.9576
aaaggtgc	-1.3367	-1.7121
aaaggtgg	0.4283	-0.063
aaaggtgt	-3.1584	-1.6901
aaaggtta	-2.403	-0.4256
aaaggttc	-0.4139	-0.8568
aaaggttg	-1.6355	0.4191
aaaggttt	-2.6506	-2.0385
aaagtaaa	-1.3082	-0.6916
aaagtaac	-0.0981	-0.5212
aaagtaag	-0.1629	0.2016
aaagtaat	-2.9292	-0.9637
aaagtaca	-0.8673	-0.595
aaagtacc	-1.931	-2.7024
aaagtacg	-0.1687	-1.6068
aaagtact	-4.0986	-0.3894
aaagtaga	-0.4904	0.0436
aaagtagc	-2.4917	-2.3297
aaagtagg	-1.8106	-1.4755
aaagtagt	-3.6167	-1.0888
aaagtata	-4.728	-2.8726	aaagtata		aaagtata
aaagtatc	-1.7892	-1.7549
aaagtatg	-3.8187	-2.1646
aaagtatt	-4.108	-2.5485
aaagtcaa	0.4392	0.6628
aaagtcac	1.0317	0.352
aaagtcag	0.268	-0.4672
aaagtcat	0.3104	0.9763
aaagtcca	-0.2897	-0.2308
aaagtccc	-0.5693	-1.6725
aaagtccg	0.3423	-0.2512
aaagtcct	-4.1086	-1.6398
aaagtcga	2.2596	1.6885
aaagtcgc	0.6249	-1.3589
aaagtcgg	-0.8182	-0.7593
aaagtcgt	0.2867	1.0797
aaagtcta	-1.7371	-0.6779
aaagtctc	-0.0439	-0.8909
aaagtctg	1.8505	1.0634
aaagtctt	-1.3205	-0.9933
aaagtgaa	0.3258	0.9131
aaagtgac	4.2621	3.1269	aaagtgac	aaagtgac
aaagtgag	3.3148	3.7704	aaagtgag	aaagtgag
aaagtgat	-3.9581	1.963
aaagtgca	-3.2544	0.2923
aaagtgcc	-2.177	-1.2054
aaagtgcg	-3.0827	-1.1173
aaagtgct	-5.3086	-1.0407
aaagtgga	2.2218	3.8812
aaagtggc	-0.331	-0.202
aaagtggg	-0.9634	-1.5073
aaagtggt	-3.6352	-0.7677
aaagtgta	-1.5924	0.752
aaagtgtc	-1.1989	-1.3124
aaagtgtg	-2.3044	0.7213
aaagtgtt	-4.3408	-0.6292
aaagttaa	-0.9329	0.1938
aaagttac	-0.6729	-0.473
aaagttag	-2.3288	-0.8229
aaagttat	-1.6811	0.2742
aaagttca	-1.5051	-0.7366
aaagttcc	1.9579	-0.1118
aaagttcg	-0.1175	-0.0273
aaagttct	-3.8168	-0.3837
aaagttga	-0.0602	1.8012
aaagttgc	-0.9486	-1.6511
aaagttgg	-1.5148	-0.213
aaagttgt	-2.9445	-0.6458
aaagttta	-3.1079	-0.2248
aaagtttc	-1.1193	-1.2204
aaagtttg	-2.4989	-0.2509
aaagtttt	-4.0775	-1.7803
aaataaaa	-4.2481	-3.9143	aaataaaa		aaataaaa
aaataaac	-0.4606	0.394
aaataaag	-0.5989	0.9189
aaataaat	-2.6982	-1.3685
aaataaca	-3.2809	-2.7429	aaataaca		aaataaca
aaataacc	-1.8613	-1.4761
aaataacg	-0.4073	-0.184
aaataact	-1.7985	-1.1121
aaataaga	-0.1405	-0.3118
aaataagc	1.6705	2.2896
aaataagg	-0.6267	-0.3328
aaataagt	-1.7533	-0.2308
aaataata	-4.2927	-1.3525
aaataatc	-2.0049	0.8246
aaataatg	-3.7141	-0.2444
aaataatt	-3.4972	-0.966
aaatacaa	-2.3413	-0.6208
aaatacac	-0.331	0.4031
aaatacag	-1.8799	-0.1888
aaatacat	-1.6478	0.3425
aaatacca	0.2193	1.1749
aaataccc	-1.5874	-2.3177
aaataccg	-1.7238	-1.0146
aaatacct	-2.6104	-1.0326
aaatacga	0.5537	-0.5324
aaatacgc	1.6483	1.0197
aaatacgg	0.9589	2.8637
aaatacgt	0.0064	0.7381
aaatacta	-3.5397	-1.6359
aaatactc	-1.6933	-0.0325
aaatactg	-1.8062	0.3876
aaatactt	-3.1064	-1.3177
aaatagaa	-0.384	2.0479
aaatagac	-1.0581	1.37
aaatagag	-1.2672	0.7054
aaatagat	-3.5258	-2.4825
aaatagca	-1.3856	0.6805
aaatagcc	-1.5845	-1.0106
aaatagcg	-2.3346	-1.5237
aaatagct	-4.4259	-2.6865	aaatagct		aaatagct
aaatagga	0.5429	2.1194
aaataggc	-0.9448	-1.3872
aaataggg	-3.2774	-1.3372
aaataggt	-3.8054	-3.5951	aaataggt		aaataggt
aaatagta	-3.5119	-2.0969
aaatagtc	-1.0792	-0.9066
aaatagtg	-2.4232	-0.9239
aaatagtt	-4.8284	-2.0384
aaatataa	-3.5536	-2.0097
aaatatac	-1.4869	-0.2702
aaatatag	-4.1693	-1.2485
aaatatat	-5.2245	-3.0728	aaatatat		aaatatat
aaatatca	-3.0675	-2.338
aaatatcc	-1.762	-0.6961
aaatatcg	-2.772	-1.8328
aaatatct	-3.7851	-1.5711
aaatatga	-2.0811	-0.1082
aaatatgc	-2.4427	-2.421
aaatatgg	-2.5219	-1.1417
aaatatgt	-4.4879	-2.1323
aaatatta	-5.135	-0.9434
aaatattc	-1.7275	-0.0425
aaatattg	-4.4	-1.1179
aaatattt	-6.1593	-2.1346
aaatcaaa	-1.1627	-1.2263
aaatcaac	1.2499	1.9517
aaatcaag	0.8764	1.2557
aaatcaat	-1.597	-0.371
aaatcaca	0.5267	-0.6774
aaatcacc	0.4634	1.0254
aaatcacg	-0.3565	-0.4607
aaatcact	-2.1696	-1.0525
aaatcaga	2.0569	1.5842
aaatcagc	2.3088	2.7988
aaatcagg	1.0212	1.6684
aaatcagt	-0.4085	-0.3425
aaatcata	-2.2763	-0.684
aaatcatc	1.0786	3.3897
aaatcatg	-1.3269	-0.6861
aaatcatt	-1.2554	-1.0596
aaatccaa	-0.0058	0.0097
aaatccac	-0.1309	-0.2239
aaatccag	1.0327	-0.046
aaatccat	-1.9908	-0.5957
aaatccca	-3.1738	-0.6514
aaatcccc	0.6353	0.5952
aaatcccg	4.3697	2.8427	aaatcccg	aaatcccg
aaatccct	-1.5177	-1.2959
aaatccga	4.4906	3.0383	aaatccga	aaatccga
aaatccgc	2.8899	1.746
aaatccgg	5.1099	2.6729	aaatccgg	aaatccgg
aaatccgt	0.9508	0.6849
aaatccta	-0.7628	-0.6897
aaatcctc	-0.4999	0.7477
aaatcctg	0.1778	3.4288
aaatcctt	-1.8553	-1.5437
aaatcgaa	1.9231	2.5995
aaatcgac	1.7821	0.9892
aaatcgag	-0.4528	0.6849
aaatcgat	-2.5946	-0.9353
aaatcgca	-0.1975	-0.8205
aaatcgcc	1.3844	1.815
aaatcgcg	0.6095	-0.0137
aaatcgct	0.3743	0.1276
aaatcgga	2.8524	1.3772
aaatcggc	2.874	1.0499
aaatcggg	1.2657	0.988
aaatcggt	1.6464	2.2204
aaatcgta	-0.2606	0.0197
aaatcgtc	-0.3412	-1.0888
aaatcgtg	3.0758	2.0241
aaatcgtt	-3.2543	-2.8312	aaatcgtt		aaatcgtt
aaatctaa	-1.3992	-0.6622
aaatctac	0.2791	2.4598
aaatctag	-2.2387	-0.4196
aaatctat	-2.5201	-0.9571
aaatctca	-0.9338	-0.9526
aaatctcc	2.6741	2.2268
aaatctcg	0.8208	0.523
aaatctct	-1.9456	-1.4916
aaatctga	1.6813	0.5342
aaatctgc	1.9433	3.2657
aaatctgg	2.5	3.2041
aaatctgt	-1.5499	-0.4326
aaatctta	-2.6563	-2.3043
aaatcttc	-1.1775	0.0062
aaatcttg	-0.4842	2.3733
aaatcttt	-3.7221	-1.3974
aaatgaaa	-1.2186	-1.5506
aaatgaac	-2.1527	-0.522
aaatgaag	-1.1682	0.3477
aaatgaat	-3.8506	-1.0407
aaatgaca	-3.2842	-2.9224	aaatgaca		aaatgaca
aaatgacc	-1.5625	-1.6203
aaatgacg	-2.2527	-3.2694
aaatgact	-1.0224	-0.8338
aaatgaga	-1.6065	-1.6062
aaatgagc	-2.4559	-1.7761
aaatgagg	-0.9529	0.1165
aaatgagt	-3.6732	-2.3872
aaatgata	-4.6014	-3.0269	aaatgata		aaatgata
aaatgatc	-3.5119	-0.1413
aaatgatg	-4.2785	-3.6115	aaatgatg		aaatgatg
aaatgatt	-3.1621	0.0296
aaatgcaa	-1.9715	-2.4497
aaatgcac	-1.2363	-1.862
aaatgcag	-3.1271	-2.9213	aaatgcag		aaatgcag
aaatgcat	-3.0444	-2.3422
aaatgcca	-2.615	-3.5925
aaatgccc	-1.1637	-2.3823
aaatgccg	-1.7238	-2.3348
aaatgcct	-2.672	-1.8812
aaatgcga	-0.212	-0.5946
aaatgcgc	-0.7265	-1.5824
aaatgcgg	-1.5393	-2.149
aaatgcgt	-1.7511	-0.8523
aaatgcta	-3.7044	-2.4972
aaatgctc	-2.4704	-2.0254
aaatgctg	-2.6853	-0.0439
aaatgctt	-4.7882	-4.0527	aaatgctt		aaatgctt
aaatggaa	-1.9612	-0.8246
aaatggac	-1.4716	-1.3631
aaatggag	-1.971	-1.2974
aaatggat	-3.947	-1.7322
aaatggca	-2.1532	-1.3312
aaatggcc	1.3215	-1.286
aaatggcg	-1.8369	-2.1394
aaatggct	-3.6589	-2.7975	aaatggct		aaatggct
aaatggga	-1.5626	-0.8951
aaatgggc	-0.2999	-0.6458
aaatgggg	-3.6377	-2.665	aaatgggg		aaatgggg
aaatgggt	-3.9941	-2.6949	aaatgggt		aaatgggt
aaatggta	-3.2715	-3.0708	aaatggta		aaatggta
aaatggtc	-2.7809	-2.9449	aaatggtc		aaatggtc
aaatggtg	-3.6763	-1.5391
aaatggtt	-4.6708	-4.0715	aaatggtt		aaatggtt
aaatgtaa	-4.4928	-3.021	aaatgtaa		aaatgtaa
aaatgtac	-2.5061	-1.0777
aaatgtag	-4.2785	-3.7185	aaatgtag		aaatgtag
aaatgtat	-5.3164	-2.2839
aaatgtca	-2.8768	-2.9547	aaatgtca		aaatgtca
aaatgtcc	-2.4746	-2.146
aaatgtcg	-2.6803	-2.1642
aaatgtct	-4.3382	-2.8906	aaatgtct		aaatgtct
aaatgtga	-1.1706	-1.0068
aaatgtgc	-2.0985	-1.2173
aaatgtgg	-1.7089	-0.0864
aaatgtgt	-4.069	-2.5353
aaatgtta	-5.2404	-4.2108	aaatgtta		aaatgtta
aaatgttc	-3.2343	-2.0455
aaatgttg	-4.1257	-1.1521
aaatgttt	-6.2119	-3.5154	aaatgttt		aaatgttt
aaattaaa	-3.2195	-1.1795
aaattaac	-1.1829	0.4288
aaattaag	-0.622	0.3077
aaattaat	-3.3336	0.1762
aaattaca	-1.4922	-0.0267
aaattacc	-0.5998	-0.363
aaattacg	-0.212	0.6849
aaattact	-2.8105	-0.6292
aaattaga	-2.5624	-0.0194
aaattagc	-1.7216	-0.3035
aaattagg	-1.8926	-0.9066
aaattagt	-3.5973	-0.4679
aaattata	-4.0391	-0.1294
aaattatc	-2.3131	-0.4239
aaattatg	-3.4856	-0.6634
aaattatt	-4.9076	-2.1883
aaattcaa	-3.0551	0.4325
aaattcac	-0.4161	0.4288
aaattcag	-0.9679	-0.4925
aaattcat	-1.8022	-0.0194
aaattcca	-2.2919	-0.7487
aaattccc	-0.4647	0.3183
aaattccg	0.649	0.5808
aaattcct	-1.5683	0.6484
aaattcga	-0.3238	0.4384
aaattcgc	0.2166	1.386
aaattcgg	2.5692	1.8038
aaattcgt	-0.6996	0.368
aaattcta	-2.3482	0.4227
aaattctc	-0.7877	0.6805
aaattctg	-1.1113	1.3805
aaattctt	-2.1286	1.4283
aaattgaa	-0.3048	0.6478
aaattgac	0.682	2.4233
aaattgag	-0.232	2.706
aaattgat	-2.3658	0.8708
aaattgca	-0.8795	1.067
aaattgcc	-2.0278	-1.3741
aaattgcg	0.0977	-0.1771
aaattgct	-3.9707	0.7597
aaattgga	-0.0402	1.2038
aaattggc	0.1836	2.5463
aaattggg	-0.7038	0.9433
aaattggt	-1.4104	0.0135
aaattgta	-3.3533	-0.1631
aaattgtc	-1.1913	-0.1631
aaattgtg	-1.9122	1.1468
aaattgtt	-3.832	-0.9839
aaatttaa	-4.8659	-2.0875
aaatttac	-0.591	1.2032
aaatttag	-3.5186	0.172
aaatttat	-3.9567	-0.903
aaatttca	-2.7642	0.1387
aaatttcc	-1.8956	-1.8722
aaatttcg	-1.4302	-0.9607
aaatttct	-3.7939	-1.6504
aaatttga	-0.9698	0.9183
aaatttgc	-1.4778	-0.7086
aaatttgg	-2.3136	0.1527
aaatttgt	-3.6233	-0.4237
aaatttta	-5.7778	-1.782
aaattttc	-4.2246	-1.5851
aaattttg	-4.2979	1.3575
aaattttt	-6.7997	-1.6408
aacaaaaa	-1.449	-2.6054
aacaaaac	-1.8553	-2.8359
aacaaaag	0.9763	-0.1062
aacaaaat	-1.0996	-0.7346
aacaaaca	-1.5671	0.0236
aacaaacc	1.1887	-1.2204
aacaaacg	1.4752	0.274
aacaaact	1.074	0.4848
aacaaaga	1.4316	2.2434
aacaaagc	1.9955	-0.4237
aacaaagg	3.0355	2.1605
aacaaagt	1.4004	1.1767
aacaaata	-2.6983	-0.5074
aacaaatc	-0.069	-1.0306
aacaaatg	-2.5867	-1.6712
aacaaatt	-1.2204	0.7814
aacaacaa	0.7946	3.3583
aacaacac	-0.5266	-0.6954
aacaacag	1.2303	0.7809
aacaacat	0.6045	0.8867
aacaacca	1.5287	1.1765
aacaaccc	2.89	0.9565
aacaaccg	1.1272	0.5626
aacaacct	1.7572	2.2562
aacaacga	2.1957	1.9875
aacaacgc	0.8995	0.2468
aacaacgg	1.4834	1.1537
aacaacgt	0.4149	0.543
aacaacta	0.8692	1.558
aacaactc	0.3388	-0.1732
aacaactg	0.059	0.7886
aacaactt	0.9484	2.022
aacaagaa	4.9079	4.6961	aacaagaa	aacaagaa
aacaagac	1.3691	1.0699
aacaagag	1.6705	-0.0643
aacaagat	-0.4664	-0.8126
aacaagca	3.4862	2.2796
aacaagcc	1.9251	0.2585
aacaagcg	1.9003	0.4128
aacaagct	2.261	-0.3299
aacaagga	4.7046	5.3177	aacaagga	aacaagga
aacaaggc	0.0959	-0.781
aacaaggg	-0.9486	-0.9554
aacaaggt	-0.3424	-1.2123
aacaagta	1.265	1.5998
aacaagtc	1.3112	2.3903
aacaagtg	-0.5114	0.2444
aacaagtt	-1.8809	-1.5862
aacaataa	-3.0519	-2.0831
aacaatac	-1.8863	-1.3238
aacaatag	-2.9822	-1.6927
aacaatat	-2.1299	-0.7449
aacaatca	-0.4405	-0.1148
aacaatcc	0.6669	1.1746
aacaatcg	1.1649	0.2642
aacaatct	0.2553	1.2125
aacaatga	-0.6755	0.1474
aacaatgc	-0.6493	-0.9817
aacaatgg	-1.0374	0.3249
aacaatgt	-2.4198	-1.1907
aacaatta	-2.7626	-0.479
aacaattc	-1.6741	-0.4679
aacaattg	-0.9555	-0.3441
aacaattt	-2.7605	-1.5116
aacacaaa	-0.9328	0.2491
aacacaac	2.2804	1.271
aacacaag	-0.0096	0.1256
aacacaat	0.1779	0.6642
aacacaca	-4.8061	-3.7057	aacacaca		aacacaca
aacacacc	0.8925	-0.7283
aacacacg	-1.5399	-1.4505
aacacact	0.5229	-0.138
aacacaga	0.8566	0.9745
aacacagc	1.4374	0.7752
aacacagg	1.1598	1.8258
aacacagt	-0.5824	-0.063
aacacata	-1.7337	0.3011
aacacatc	0.6455	1.7473
aacacatg	-0.6953	-0.0612
aacacatt	-0.1094	0.8507
aacaccaa	3.5709	2.6329	aacaccaa	aacaccaa
aacaccac	0.4952	0.0679
aacaccag	3.7742	2.3443
aacaccat	2.1255	2.4324
aacaccca	1.9006	0.148
aacacccc	1.8353	1.3407
aacacccg	4.4689	1.6239
aacaccct	4.0505	2.388
aacaccga	1.7185	1.8584
aacaccgc	2.3157	1.449
aacaccgg	0.066	0.2066
aacaccgt	-0.3412	0.0159
aacaccta	1.168	0.3022
aacacctc	4.784	2.8608	aacacctc	aacacctc
aacacctg	-1.1247	2.3454
aacacctt	1.4712	1.2586
aacacgaa	2.8132	1.4991
aacacgac	1.6784	3.0789
aacacgag	0.3002	-0.2876
aacacgat	-1.3445	-1.0809
aacacgca	-1.0138	-1.1908
aacacgcc	2.8641	1.224
aacacgcg	2.3685	0.1808
aacacgct	-0.2364	-0.8061
aacacgga	0.6545	-0.5318
aacacggc	0.0421	-1.3012
aacacggg	-1.2668	-0.6598
aacacggt	-1.679	-1.4939
aacacgta	-0.7884	0.2214
aacacgtc	0.9029	1.0499
aacacgtg	0.1128	0.4834
aacacgtt	-1.4767	-0.0262
aacactaa	-2.4797	-2.3383
aacactac	1.0439	0.4538
aacactag	-0.2479	0.749
aacactat	-2.7437	-2.3676
aacactca	-1.4929	-1.3631
aacactcc	1.0605	-0.0335
aacactcg	-1.0098	-1.3622
aacactct	-0.2358	-0.8362
aacactga	0.2076	0.4685
aacactgc	1.6947	2.7988
aacactgg	0.4718	-0.1755
aacactgt	-1.5148	-0.6179
aacactta	-2.0471	-2.0052
aacacttc	0.2269	-0.4787
aacacttg	-2.1907	-0.0103
aacacttt	-4.1353	-0.5074
aacagaaa	3.3286	3.7958	aacagaaa	aacagaaa
aacagaac	2.098	1.9195
aacagaag	5.0232	5.8545	aacagaag	aacagaag
aacagaat	0.3951	1.5654
aacagaca	0.9989	1.0634
aacagacc	2.8346	0.6739
aacagacg	1.8396	0.89
aacagact	0.5008	-0.0088
aacagaga	3.704	4.2991	aacagaga	aacagaga
aacagagc	1.9568	0.5934
aacagagg	4.4772	3.7818	aacagagg	aacagagg
aacagagt	2.277	2.1901
aacagata	-1.0318	0.4223
aacagatc	0.7711	1.7624
aacagatg	-1.434	-0.4396
aacagatt	-0.0308	1.6818
aacagcaa	2.0699	2.2635
aacagcac	1.9329	2.348
aacagcag	3.6286	0.5294
aacagcat	1.8071	2.7705
aacagcca	2.4449	-0.4413
aacagccc	3.8507	0.8643
aacagccg	3.447	0.9273
aacagcct	2.6115	0.5585
aacagcga	1.6654	1.0444
aacagcgc	0.0977	-0.7593
aacagcgg	4.398	1.8318
aacagcgt	1.2657	0.6437
aacagcta	-0.502	0.96
aacagctc	0.3916	-0.3228
aacagctg	1.6843	2.779
aacagctt	-0.4085	0.2585
aacaggaa	3.2599	2.5915
aacaggac	1.4073	0.3267
aacaggag	1.5123	0.8849
aacaggat	-1.0154	-0.6458
aacaggca	-0.8797	0.0505
aacaggcc	3.0688	1.6779
aacaggcg	0.0208	0.3858
aacaggct	1.4374	0.8586
aacaggga	0.4627	-0.1696
aacagggc	0.2521	-0.7449
aacagggg	-1.2743	-0.8793
aacagggt	-3.6513	-2.9195	aacagggt		aacagggt
aacaggta	-1.302	-1.1709
aacaggtc	-0.5192	-0.0609
aacaggtg	-2.8617	-2.07
aacaggtt	-2.5697	-1.3779
aacagtaa	-0.0752	0.0341
aacagtac	-1.4067	-0.2667
aacagtag	-0.9243	-0.2142
aacagtat	-2.3816	-0.7977
aacagtca	-0.2708	0.02
aacagtcc	0.166	0.6565
aacagtcg	1.6483	1.2325
aacagtct	0.3632	0.7293
aacagtga	1.9721	2.4764
aacagtgc	0.3056	0.5343
aacagtgg	-0.0341	3.2153
aacagtgt	-1.052	0.566
aacagtta	-2.9296	-1.665
aacagttc	0.6353	0.1474
aacagttg	-1.2698	-0.783
aacagttt	-3.1722	-2.8404	aacagttt		aacagttt
aacataaa	-2.854	-1.6897
aacataac	-0.9095	-0.9332
aacataag	0.6185	1.0568
aacataat	-1.6029	-0.653
aacataca	-2.9872	-2.2036
aacatacc	-0.0019	-0.362
aacatacg	0.8484	0.4873
aacatact	-1.9152	-1.0154
aacataga	-1.1479	-0.1939
aacatagc	-0.9784	0.4356
aacatagg	-0.5067	0.6891
aacatagt	-1.905	1.154
aacatata	-4.1004	-2.6514	aacatata		aacatata
aacatatc	-1.84	-1.7741
aacatatg	-1.802	-0.2442
aacatatt	-1.0373	0.7729
aacatcaa	-0.4822	0.8414
aacatcac	0.6257	0.4803
aacatcag	1.4493	0.2436
aacatcat	1.074	1.6289
aacatcca	0.3324	0.1742
aacatccc	0.4779	0.2444
aacatccg	2.3048	0.988
aacatcct	2.148	1.558
aacatcga	1.4184	1.7384
aacatcgc	2.0119	2.0713
aacatcgg	2.2596	2.0526
aacatcgt	-0.3752	0.935
aacatcta	1.6798	1.0887
aacatctc	-0.2213	-0.2378
aacatctg	2.907	3.9357	aacatctg	aacatctg
aacatctt	-0.1198	1.4947
aacatgaa	-1.0678	-0.6522
aacatgac	-0.4347	-0.3035
aacatgag	-1.8702	-0.4903
aacatgat	-2.5518	-1.4025
aacatgca	-2.2445	-2.4995
aacatgcc	-0.8204	-0.8064
aacatgcg	0.7415	-0.1846
aacatgct	-1.1762	-1.2554
aacatgga	-2.016	-0.9091
aacatggc	-1.223	-0.8245
aacatggg	-2.4414	-1.9275
aacatggt	-3.8788	-2.5077
aacatgta	-2.6323	-2.0514
aacatgtc	-1.5182	-0.71
aacatgtg	-2.2536	-2.4814
aacatgtt	-3.6359	-2.0004
aacattaa	-2.7295	-1.4872
aacattac	-0.1457	-0.3228
aacattag	-2.6158	-1.8726
aacattat	-1.8926	-0.5946
aacattca	-1.346	-0.1631
aacattcc	1.2245	0.52
aacattcg	0.3341	0.1276
aacattct	-2.2784	-2.1727
aacattga	2.1316	3.7626
aacattgc	1.0211	1.5931
aacattgg	0.088	2.796
aacattgt	-1.821	-0.22
aacattta	-3.7629	-1.16
aacatttc	-0.3576	-0.8891
aacatttg	-2.2179	-0.6959
aacatttt	-4.2065	-1.7186
aaccaaaa	0.1016	0.0605
aaccaaac	1.4052	-0.0132
aaccaaag	1.4995	0.1856
aaccaaat	-0.0432	-1.3495
aaccaaca	3.1668	3.038	aaccaaca	aaccaaca
aaccaacc	3.6736	0.039
aaccaacg	1.2211	0.4873
aaccaact	0.8467	-0.061
aaccaaga	3.3994	3.5471	aaccaaga	aaccaaga
aaccaagc	1.5831	-0.0038
aaccaagg	2.6427	2.1573
aaccaagt	0.0286	0.3432
aaccaata	-0.5067	0.1654
aaccaatc	-0.8069	-0.4318
aaccaatg	-0.394	-0.161
aaccaatt	0.1151	-0.1148
aaccacaa	2.6722	0.5949
aaccacac	0.3367	-1.3545
aaccacag	1.329	-0.4866
aaccacat	0.8855	-0.0616
aaccacca	2.8411	2.6663	aaccacca	aaccacca
aaccaccc	0.8239	0.3281
aaccaccg	1.1211	-1.0794
aaccacct	0.3546	0.6124
aaccacga	3.2598	2.7393	aaccacga	aaccacga
aaccacgc	3.8251	0.9354
aaccacgg	1.8283	-1.4025
aaccacgt	2.8754	3.2675	aaccacgt	aaccacgt
aaccacta	0.6992	0.9244
aaccactc	1.5585	0.4202
aaccactg	1.3355	1.961
aaccactt	0.009	-1.0525
aaccagaa	4.2289	3.0405	aaccagaa	aaccagaa
aaccagac	2.2684	1.0887
aaccagag	4.4717	1.806
aaccagat	1.1827	0.221
aaccagca	6.7256	3.7247	aaccagca	aaccagca
aaccagcc	6.1555	2.9062	aaccagcc	aaccagcc
aaccagcg	4.4169	0.0475
aaccagct	2.2032	1.2817
aaccagga	4.7457	3.7335	aaccagga	aaccagga
aaccaggc	2.0662	1.6116
aaccaggg	0.4164	-0.4637
aaccaggt	-0.9966	-1.0549
aaccagta	2.4685	1.9378
aaccagtc	2.8213	2.3096
aaccagtg	0.8548	0.4066
aaccagtt	0.8807	-0.0626
aaccataa	-1.782	-0.8536
aaccatac	0.353	0.4969
aaccatag	-1.5023	-2.2335
aaccatat	-1.3113	-1.1224
aaccatca	2.9977	4.9811	aaccatca	aaccatca
aaccatcc	1.5278	1.6634
aaccatcg	2.1039	0.8517
aaccatct	0.5536	0.6661
aaccatga	0.2237	1.4961
aaccatgc	-0.8069	0.2779
aaccatgg	-0.0923	0.1975
aaccatgt	-2.0625	-0.8886
aaccatta	-2.6158	-1.9835
aaccattc	1.6049	1.1844
aaccattg	-0.472	-0.3441
aaccattt	-2.5443	-1.2244
aacccaaa	1.443	1.1192
aacccaac	2.4205	0.8414
aacccaag	3.5011	0.9091
aacccaat	0.9147	0.3249
aacccaca	0.9406	-0.2342
aacccacc	1.0898	-0.4679
aacccacg	4.2953	0.8879
aacccact	1.4485	0.2732
aacccaga	4.2809	2.4246
aacccagc	-0.182	0.3723
aacccagg	4.6867	2.6063
aacccagt	2.5496	2.3618
aacccata	-0.1514	-1.1521
aacccatc	2.7438	2.1821
aacccatg	-0.0518	0.755
aacccatt	0.579	1.3278
aaccccaa	2.148	0.7382
aaccccac	4.4371	1.1745
aaccccag	0.7439	0.3282
aaccccat	0.9702	0.6933
aaccccca	0.6185	-0.2544
aacccccc	5.6892	1.1749
aacccccg	3.0095	-0.3714
aaccccct	3.1254	1.6601
aaccccga	4.6387	1.1823
aaccccgc	3.8644	-0.8818
aaccccgg	6.5876	-0.1352
aaccccgt	1.78	1.2912
aaccccta	1.2365	0.2444
aacccctc	2.2885	-0.5593
aacccctg	-0.0167	2.3734
aacccctt	1.2543	-0.5212
aacccgaa	3.2064	1.6782
aacccgac	3.8192	1.5786
aacccgag	6.1206	1.2639
aacccgat	1.1642	0.0241
aacccgca	6.7824	1.9014
aacccgcc	2.2476	-1.895
aacccgcg	2.4958	-1.5364
aacccgct	1.7142	-1.5192
aacccgga	7.7019	3.4063	aacccgga	aacccgga
aacccggc	4.6387	-0.0893
aacccggg	5.0015	-0.4419
aacccggt	2.4087	0.9656
aacccgta	1.3008	-0.1937
aacccgtc	1.9003	0.9185
aacccgtg	3.263	-0.1937
aacccgtt	-1.3357	-2.2353
aaccctaa	1.5585	1.4205
aaccctac	1.7565	0.0618
aaccctag	0.4749	-0.6517
aaccctat	-0.4572	-0.5765
aaccctca	2.3548	-0.4326
aaccctcc	5.7986	2.1699
aaccctcg	3.8251	-0.4903
aaccctct	0.449	-0.4976
aaccctga	3.5792	2.2365
aaccctgc	6.6005	3.0987	aaccctgc	aaccctgc
aaccctgg	4.6648	2.8522	aaccctgg	aaccctgg
aaccctgt	1.4867	1.006
aaccctta	-0.0707	-1.1441
aacccttc	1.3223	0.7027
aacccttg	1.5374	0.4653
aacccttt	-2.6669	-2.3104
aaccgaaa	3.8931	1.6372
aaccgaac	1.7094	0.3287
aaccgaag	4.6387	2.216
aaccgaat	1.3965	0.5339
aaccgaca	1.656	0.8439
aaccgacc	2.4779	0.4413
aaccgacg	0.6583	-1.436
aaccgact	2.3054	0.3314
aaccgaga	3.1329	1.6558
aaccgagc	2.0435	-0.5564
aaccgagg	5.9522	3.7367	aaccgagg	aaccgagg
aaccgagt	1.2535	0.1493
aaccgata	-1.5784	-1.5442
aaccgatc	0.9576	0.9006
aaccgatg	-0.1935	0.1293
aaccgatt	0.2901	1.0015
aaccgcaa	2.4894	0.034
aaccgcac	1.3719	-0.4349
aaccgcag	4.4643	-0.4315
aaccgcat	2.1479	0.6293
aaccgcca	1.6125	0.219
aaccgccc	-0.1278	-1.7878
aaccgccg	2.2185	-1.6855
aaccgcct	2.6719	0.2989
aaccgcga	2.8179	-0.2678
aaccgcgc	2.6415	-1.3082
aaccgcgg	4.0379	-1.013
aaccgcgt	0.4237	-1.4727
aaccgcta	0.7971	-0.7331
aaccgctc	2.2269	-0.0237
aaccgctg	1.7288	1.0378
aaccgctt	0.2176	-0.4639
aaccggaa	4.5315	1.6809
aaccggac	2.5601	1.0015
aaccggag	7.7012	1.0257
aaccggat	-0.3591	-1.5237
aaccggca	4.0298	1.0048
aaccggcc	2.6357	-0.7337
aaccggcg	4.7336	-0.7976
aaccggct	0.9576	-1.6243
aaccggga	4.9622	1.1309
aaccgggc	0.8995	-0.2416
aaccgggg	-0.158	-2.3532
aaccgggt	0.8989	-0.2876
aaccggta	-0.1848	-1.6134
aaccggtc	3.8251	2.7101	aaccggtc	aaccggtc
aaccggtg	-0.1935	-0.5419
aaccggtt	2.3918	-0.1394
aaccgtaa	-0.3148	-0.5377
aaccgtac	-0.2553	-1.4545
aaccgtag	1.1642	0.5186
aaccgtat	-1.011	-1.0461
aaccgtca	1.6483	1.0197
aaccgtcc	1.5203	-0.8984
aaccgtcg	-0.4382	-1.9403
aaccgtct	-0.4455	-1.2435
aaccgtga	2.4983	0.7433
aaccgtgc	1.6483	-0.5106
aaccgtgg	3.0672	0.474
aaccgtgt	0.2867	0.2926
aaccgtta	-1.6189	-2.8209
aaccgttc	1.0722	-0.3387
aaccgttg	0.2281	-0.8061
aaccgttt	-3.0489	-3.2349	aaccgttt		aaccgttt
aacctaaa	-0.9646	-0.8229
aacctaac	-1.3958	-2.5939
aacctaag	0.25	0.3561
aacctaat	-1.2889	-0.7277
aacctaca	0.1105	-0.656
aacctacc	-0.3253	0.3488
aacctacg	-0.2786	-0.1599
aacctact	0.9397	0.6729
aacctaga	0.5715	0.5779
aacctagc	-0.4052	-1.1908
aacctagg	-1.4255	-2.079
aacctagt	-1.6465	-1.5262
aacctata	-0.7771	-1.4459
aacctatc	-0.877	-0.9726
aacctatg	-0.2429	-0.2582
aacctatt	-1.7237	-2.1833
aacctcaa	-0.4254	1.4256
aacctcac	0.0017	0.0225
aacctcag	0.7534	0.4202
aacctcat	0.5293	-0.2163
aacctcca	0.9042	2.1966
aacctccc	0.2383	3.7335
aacctccg	0.9364	2.0098
aacctcct	-1.7796	1.5909
aacctcga	2.507	3.3867
aacctcgc	0.6545	-0.6637
aacctcgg	2.222	1.9559
aacctcgt	1.7185	1.1265
aacctcta	1.2803	-0.2308
aacctctc	1.4387	1.7931
aacctctg	1.8003	2.6943
aacctctt	0.9723	0.6063
aacctgaa	3.2365	1.1082
aacctgac	3.276	2.9403	aacctgac	aacctgac
aacctgag	5.3499	2.8433	aacctgag	aacctgag
aacctgat	1.4052	0.0116
aacctgca	4.1763	2.483
aacctgcc	3.8181	4.8087	aacctgcc	aacctgcc
aacctgcg	2.6932	0.0931
aacctgct	3.1339	2.5211
aacctgga	3.2946	2.2126
aacctggc	3.1654	2.8961	aacctggc	aacctggc
aacctggg	1.9273	-0.5383
aacctggt	-0.0439	0.3281
aacctgta	-1.7124	-1.6309
aacctgtc	1.2453	1.1522
aacctgtg	2.4279	2.3182
aacctgtt	0.4261	0.8101
aaccttaa	-1.7984	-2.4627
aaccttac	-1.1334	-1.2399
aaccttag	-1.6226	-1.05
aaccttat	-2.6466	-2.5454
aaccttca	1.883	1.2304
aaccttcc	2.1255	1.073
aaccttcg	1.8895	1.2679
aaccttct	-0.4514	0.4933
aaccttga	2.2501	3.3612
aaccttgc	1.0512	0.7747
aaccttgg	1.7419	0.1003
aaccttgt	0.2541	1.6248
aaccttta	-1.7505	-1.3605
aacctttc	-1.0017	-1.0306
aacctttg	-0.9707	0.3105
aacctttt	-3.4834	-3.21	aacctttt		aacctttt
aacgaaaa	0.6639	-0.0866
aacgaaac	0.1797	-1.2522
aacgaaag	1.7699	0.7367
aacgaaat	0.6969	0.1313
aacgaaca	-0.6757	-0.1448
aacgaacc	3.0899	0.3705
aacgaacg	0.2226	-0.9823
aacgaact	-1.0816	-1.8065
aacgaaga	4.2981	2.4593
aacgaagc	0.4963	-0.8061
aacgaagg	1.2726	0.2633
aacgaagt	1.5098	0.5626
aacgaata	-0.5089	0.5527
aacgaatc	1.2784	0.5812
aacgaatg	-2.2903	-1.4333
aacgaatt	2.4194	2.4282
aacgacaa	1.2657	1.1739
aacgacac	2.9575	0.595
aacgacag	0.8744	-1.4207
aacgacat	-0.1499	-0.3787
aacgacca	2.6357	1.754
aacgaccc	1.5847	-0.8251
aacgaccg	2.6415	0.1461
aacgacct	3.0024	0.8517
aacgacga	3.4478	0.83
aacgacgc	3.5783	-1.2196
aacgacgg	3.2578	-0.292
aacgacgt	-0.7748	-1.2344
aacgacta	3.6442	1.6863
aacgactc	1.0401	1.0499
aacgactg	4.0809	3.3731	aacgactg	aacgactg
aacgactt	3.46	1.8383
aacgagaa	6.0335	4.2839	aacgagaa	aacgagaa
aacgagac	1.9926	1.5834
aacgagag	2.4894	-0.6151
aacgagat	0.2944	-0.2064
aacgagca	1.9231	3.4892
aacgagcc	2.2743	0.3094
aacgagcg	2.0518	-0.7028
aacgagct	2.1443	1.1658
aacgagga	5.4845	3.3983	aacgagga	aacgagga
aacgaggc	3.0707	1.0761
aacgaggg	1.1833	-1.303
aacgaggt	-0.0925	-0.8523
aacgagta	1.5795	2.3767
aacgagtc	4.5437	2.5729
aacgagtg	0.443	1.3562
aacgagtt	-1.33	-0.6218
aacgataa	-1.7059	-1.2435
aacgatac	0.7971	0.1808
aacgatag	-1.5705	-1.5547
aacgatat	-0.6681	-0.4205
aacgatca	-0.0301	-0.2239
aacgatcc	2.5242	3.1576
aacgatcg	4.7336	0.4123
aacgatct	1.9409	1.1739
aacgatga	0.1771	1.4616
aacgatgc	0.811	-0.8201
aacgatgg	-1.6623	-2.2914
aacgatgt	-0.6536	-0.5484
aacgatta	1.0456	0.6329
aacgattc	2.7675	3.4828	aacgattc	aacgattc
aacgattg	0.385	0.935
aacgattt	-1.0878	-1.0693
aacgcaaa	1.8906	0.89
aacgcaac	3.6181	1.3445
aacgcaag	4.642	2.9303	aacgcaag	aacgcaag
aacgcaat	0.4671	-0.6577
aacgcaca	-0.2015	-0.4294
aacgcacc	0.2495	-1.3227
aacgcacg	0.9139	-1.2407
aacgcact	-0.0604	-1.1457
aacgcaga	1.3101	0.1724
aacgcagc	0.134	-2.2335
aacgcagg	0.7645	-0.6099
aacgcagt	-0.2498	-0.6377
aacgcata	0.6262	0.6787
aacgcatc	1.5829	-0.0627
aacgcatg	-1.0752	0.7278
aacgcatt	2.15	0.6575
aacgccaa	1.8895	1.4029
aacgccac	2.9375	0.4538
aacgccag	2.8773	0.7679
aacgccat	3.3894	0.7296
aacgccca	-0.5433	-1.4143
aacgcccc	4.4316	-0.2508
aacgcccg	4.741	0.988
aacgccct	2.414	-0.3972
aacgccga	1.1206	-1.5486
aacgccgc	3.041	-1.3302
aacgccgg	6.4508	0.2779
aacgccgt	4.2154	0.7883
aacgccta	0.3668	-0.8316
aacgcctc	2.286	0.3875
aacgcctg	-2.4989	2.0718
aacgcctt	2.7739	0.7079
aacgcgaa	3.0567	2.8252	aacgcgaa	aacgcgaa
aacgcgac	0.1574	-1.8115
aacgcgag	3.847	-0.4732
aacgcgat	-0.1801	-0.9891
aacgcgca	1.8082	-0.4509
aacgcgcc	-0.2547	-1.9607
aacgcgcg	0.6653	-2.8209
aacgcgct	5.9339	1.0015
aacgcgga	2.4958	-0.4615
aacgcggc	6.673	0.0126
aacgcggg	2.5954	-0.5913
aacgcggt	0.0071	-1.3892
aacgcgta	0.3196	-0.38
aacgcgtc	1.1206	-0.0739
aacgcgtg	0.7582	-0.759
aacgcgtt	-1.3555	-1.3655
aacgctaa	0.4671	-0.2354
aacgctac	0.0651	-0.4425
aacgctag	0.8484	1.1576
aacgctat	-0.0604	0.287
aacgctca	0.8058	0.4128
aacgctcc	6.229	1.0378
aacgctcg	3.2606	0.3418
aacgctct	2.6415	0.2926
aacgctga	3.3919	2.5059
aacgctgc	4.0314	-0.0056
aacgctgg	0.9045	1.2015
aacgctgt	-0.262	-0.2667
aacgctta	-0.5486	-0.7976
aacgcttc	1.5098	0.9431
aacgcttg	1.9926	1.1537
aacgcttt	-2.7714	-3.4361	aacgcttt		aacgcttt
aacggaaa	2.6654	1.3832
aacggaac	1.0722	0.1937
aacggaag	2.0415	1.7821
aacggaat	0.6419	1.0211
aacggaca	-0.6679	-1.8332
aacggacc	2.3987	0.5256
aacggacg	2.6303	0.1808
aacggact	2.6397	0.543
aacggaga	2.8132	1.4283
aacggagc	2.3918	-0.498
aacggagg	7.2736	4.4116	aacggagg	aacggagg
aacggagt	0.2586	0.3961
aacggata	-0.91	-0.4947
aacggatc	2.3221	1.9058
aacggatg	-0.8779	-0.8773
aacggatt	-0.262	0.7696
aacggcaa	1.3598	-0.062
aacggcac	1.2087	-0.7815
aacggcag	3.2673	-0.4912
aacggcat	0.4925	0.3314
aacggcca	-0.158	-1.9244
aacggccc	3.6234	0.0069
aacggccg	3.4942	-0.5484
aacggcct	3.3085	0.8933
aacggcga	2.4278	0.5186
aacggcgc	2.438	-2.2158
aacggcgg	1.4877	-2.9775
aacggcgt	1.6961	0.5967
aacggcta	0.4739	-1.34
aacggctc	3.7059	1.3338
aacggctg	1.8895	0.51
aacggctt	-0.91	-2.2353
aacgggaa	0.9045	0.0475
aacgggac	1.3052	0.543
aacgggag	2.2779	-0.9039
aacgggat	-1.1666	-0.2051
aacgggca	1.9401	0.2989
aacgggcc	2.9943	-1.2925
aacgggcg	1.5664	-0.8009
aacgggct	2.8589	-0.4903
aacgggga	2.7974	2.0244
aacggggc	0.7415	-0.4855
aacggggg	0.131	-1.4156
aacggggt	-0.8027	-0.7928
aacgggta	-0.714	-0.8771
aacgggtc	1.656	0.0622
aacgggtg	-0.7749	-0.7331
aacgggtt	-0.8337	0.2389
aacggtaa	-0.1292	0.7278
aacggtac	-0.1117	-1.3987
aacggtag	-0.2786	-0.4615
aacggtat	-1.4765	-1.5087
aacggtca	-0.9896	-1.1123
aacggtcc	0.6771	-0.9223
aacggtcg	1.7648	-0.4384
aacggtct	0.1805	-0.858
aacggtga	1.5079	0.231
aacggtgc	0.7415	-0.2626
aacggtgg	2.5203	1.7615
aacggtgt	0.603	1.5208
aacggtta	-0.8765	-1.2545
aacggttc	2.3082	0.0965
aacggttg	-1.3958	-0.4947
aacggttt	-1.62	-0.9809
aacgtaaa	-1.2459	-1.5802
aacgtaac	-2.0833	-1.6472
aacgtaag	-0.0441	-0.5111
aacgtaat	-2.5296	-1.976
aacgtaca	-1.7509	-1.4883
aacgtacc	-0.7591	0.4494
aacgtacg	-0.8329	-0.4808
aacgtact	0.3668	-0.5484
aacgtaga	-2.0264	-2.0582
aacgtagc	0.2495	-1.5793
aacgtagg	0.0208	-1.5532
aacgtagt	-2.4627	-0.7873
aacgtata	-1.7509	-2.3652
aacgtatc	-1.4765	-1.99
aacgtatg	-1.5705	-1.5217
aacgtatt	-2.0402	-0.4615
aacgtcaa	1.166	1.1089
aacgtcac	1.0025	-0.4294
aacgtcag	0.6419	-0.3423
aacgtcat	0.4722	0.5812
aacgtcca	-0.6315	-1.2092
aacgtccc	-1.0262	-1.2196
aacgtccg	0.9615	0.384
aacgtcct	1.5311	1.7389
aacgtcga	1.3907	-0.2678
aacgtcgc	5.6545	0.992
aacgtcgg	1.8045	0.5256
aacgtcgt	1.5893	-0.3264
aacgtcta	1.7694	0.6378
aacgtctc	1.2535	-0.9825
aacgtctg	2.4243	1.7615
aacgtctt	1.6646	0.3249
aacgtgaa	1.2354	0.6139
aacgtgac	2.0478	1.2448
aacgtgag	4.0736	1.1823
aacgtgat	1.348	3.2772
aacgtgca	1.8847	0.4595
aacgtgcc	0.9029	0.2705
aacgtgcg	5.8844	1.6437
aacgtgct	-1.4543	1.3554
aacgtgga	1.4344	1.3554
aacgtggc	1.5098	0.4834
aacgtggg	-0.1385	-1.0046
aacgtggt	0.4947	1.8466
aacgtgta	-0.3068	-0.0237
aacgtgtc	1.0379	1.7437
aacgtgtg	-0.0205	0.6437
aacgtgtt	-0.6263	-0.7629
aacgttaa	-2.6803	-2.0582
aacgttac	-0.0301	-1.2761
aacgttag	-2.6167	-1.7777
aacgttat	-2.387	-2.0474
aacgttca	-1.6658	-1.1123
aacgttcc	1.0025	-0.8216
aacgttcg	-0.6505	-1.778
aacgttct	-1.3205	-0.3387
aacgttga	3.027	3.4803	aacgttga	aacgttga
aacgttgc	2.3985	0.7253
aacgttgg	0.5838	0.7689
aacgttgt	-0.2498	0.5876
aacgttta	-2.6093	-1.9387
aacgtttc	-1.5127	-2.6338
aacgtttg	-1.4998	-0.0615
aacgtttt	-2.2739	-0.0262
aactaaaa	-2.967	-1.9428
aactaaac	0.5008	-0.8128
aactaaag	0.1118	1.3654
aactaaat	-1.1395	-0.5117
aactaaca	-0.8728	0.0475
aactaacc	-1.0418	-2.0328
aactaacg	-1.3695	-1.3221
aactaact	-0.9243	-0.9554
aactaaga	0.116	1.3587
aactaagc	-0.2498	-0.9939
aactaagg	1.3412	0.5721
aactaagt	-0.7608	-1.3631
aactaata	-2.8137	0
aactaatc	-0.5677	0.33
aactaatg	-3.3204	-2.057
aactaatt	-2.9143	-0.4158
aactacaa	2.2674	2.6042
aactacac	1.9325	1.6372
aactacag	0.7342	-0.3152
aactacat	0.7711	1.4942
aactacca	-0.2509	0.1246
aactaccc	1.1621	0.2648
aactaccg	1.1313	1.0778
aactacct	-0.0882	0.6139
aactacga	3.9616	4.5367	aactacga	aactacga
aactacgc	-0.7591	-1.6822
aactacgg	2.4768	0.9185
aactacgt	0.4671	0.4123
aactacta	0.3078	1.1369
aactactc	1.7673	-0.0056
aactactg	-2.9384	1.3242
aactactt	-0.762	0.1805
aactagaa	3.2952	3.0735	aactagaa	aactagaa
aactagac	0.1566	1.4648
aactagag	-0.9163	-0.7555
aactagat	-1.4285	-0.362
aactagca	2.3084	2.0768
aactagcc	1.2001	0.4196
aactagcg	0.1976	-1.7437
aactagct	-1.881	-1.1655
aactagga	0.7637	0.7994
aactaggc	-0.5079	0.2468
aactaggg	-1.5689	-2.115
aactaggt	-2.8657	-1.7546
aactagta	-0.0624	0.034
aactagtc	-1.4255	-0.76
aactagtg	-1.1002	-1.1031
aactagtt	-2.4941	-2.1015
aactataa	-1.2221	0.6353
aactatac	-0.3643	0.8987
aactatag	-3.2704	-2.3569
aactatat	-1.3237	-1.1941
aactatca	-1.289	-0.4148
aactatcc	0.7178	0.4969
aactatcg	-0.8734	-1.9312
aactatct	-0.5813	0.3608
aactatga	-1.0011	-0.2331
aactatgc	-1.1027	-1.002
aactatgg	-1.3614	-0.6377
aactatgt	-1.4978	-0.0325
aactatta	-1.9117	-1.1475
aactattc	-0.2596	0.3432
aactattg	-1.6555	0.779
aactattt	-4.052	-2.5434
aactcaaa	0.7335	0.3745
aactcaac	2.8615	2.2353
aactcaag	1.1777	2.6356
aactcaat	-0.5693	-0.6151
aactcaca	-1.294	-1.8097
aactcacc	3.6006	2.781	aactcacc	aactcacc
aactcacg	-0.4803	-0.5812
aactcact	-1.9586	-1.5644
aactcaga	2.3088	1.5707
aactcagc	2.2568	4.2969
aactcagg	0.4899	0.9875
aactcagt	-0.8945	-0.6424
aactcata	-1.3561	-0.72
aactcatc	1.3752	1.2399
aactcatg	-3.4417	0.0618
aactcatt	0.5239	0.2447
aactccaa	2.4274	1.9077
aactccac	4.1799	1.9783
aactccag	0.1285	0.3396
aactccat	0.6744	-1.054
aactccca	0.0294	0.2936
aactcccc	4.3871	0.7986
aactcccg	-1.6774	-1.1004
aactccct	2.0059	0.4958
aactccga	1.3439	1.1537
aactccgc	3.7331	0.9599
aactccgg	-0.9487	0.1425
aactccgt	0.8995	-0.9369
aactccta	-2.7918	-1.2304
aactcctc	-0.6639	1.2557
aactcctg	-2.3267	2.0443
aactcctt	-2.4376	-1.6983
aactcgaa	4.2098	4.7839	aactcgaa	aactcgaa
aactcgac	4.5437	1.9017
aactcgag	3.2604	1.439
aactcgat	0.5623	1.0015
aactcgca	4.1294	1.0761
aactcgcc	4.1152	1.1089
aactcgcg	1.4449	-0.8825
aactcgct	1.2515	-0.6688
aactcgga	4.5998	2.7194	aactcgga	aactcgga
aactcggc	1.2354	2.3659
aactcggg	2.1179	0.0414
aactcggt	-0.3591	-1.3082
aactcgta	0.6899	-0.1448
aactcgtc	1.6483	0.1669
aactcgtg	-2.7452	0.8605
aactcgtt	-1.6083	-2.3057
aactctaa	-0.6071	-0.0088
aactctac	4.7128	4.1272	aactctac	aactctac
aactctag	0.0617	0.3314
aactctat	-0.0518	-0.0612
aactctca	1.1608	0.5833
aactctcc	4.2842	1.8258
aactctcg	3.3919	2.4598
aactctct	-0.1152	-1.2304
aactctga	2.9525	1.2455
aactctgc	5.944	3.2113	aactctgc	aactctgc
aactctgg	2.1539	2.1194
aactctgt	0.2508	0.4815
aactctta	-0.8054	-1.011
aactcttc	1.6702	1.8258
aactcttg	-2.2175	1.0621
aactcttt	-1.0494	-1.2783
aactgaaa	2.4277	2.2572
aactgaac	1.8048	1.8261
aactgaag	6.913	5.3615	aactgaag	aactgaag
aactgaat	0.0519	1.293
aactgaca	0.2541	-0.6068
aactgacc	5.2213	3.7044	aactgacc	aactgacc
aactgacg	2.6897	2.629	aactgacg	aactgacg
aactgact	-0.0519	-0.1881
aactgaga	0.5894	1.385
aactgagc	4.3062	1.6521
aactgagg	2.5134	2.0206
aactgagt	1.1448	3.206
aactgata	-1.7216	-0.2442
aactgatc	-0.0669	3.3983
aactgatg	-0.2897	1.8546
aactgatt	-0.1305	1.6391
aactgcaa	0.6945	2.0329
aactgcac	4.5385	1.0372
aactgcag	2.4984	1.383
aactgcat	-0.6729	-0.7132
aactgcca	0.8239	0.1162
aactgccc	3.1175	1.2024
aactgccg	3.3258	0.7433
aactgcct	0.3074	0.2793
aactgcga	0.5828	-1.2134
aactgcgc	2.7132	-0.0612
aactgcgg	3.7331	1.2639
aactgcgt	-0.2974	-0.2239
aactgcta	-0.8629	-0.9091
aactgctc	3.2537	0.9405
aactgctg	-2.6424	1.7638
aactgctt	0.1724	0.003
aactggaa	4.0127	3.4779	aactggaa	aactggaa
aactggac	5.6845	4.5741	aactggac	aactggac
aactggag	4.8138	4.7796	aactggag	aactggag
aactggat	1.3044	2.9028
aactggca	3.6192	2.8629	aactggca	aactggca
aactggcc	3.6472	3.3786	aactggcc	aactggcc
aactggcg	1.9409	0.7689
aactggct	1.4981	0.4806
aactggga	0.1404	2.4109
aactgggc	0.3576	-1.2604
aactgggg	0.3069	-0.3482
aactgggt	-0.3686	-0.584
aactggta	1.8353	1.3083
aactggtc	1.5374	0.6933
aactggtg	0.5171	1.349
aactggtt	-1.9393	0.034
aactgtaa	-2.2202	-1.3819
aactgtac	2.5028	1.8703
aactgtag	-1.556	-0.2611
aactgtat	-1.5143	-0.781
aactgtca	-0.6319	0.2555
aactgtcc	2.2072	0.8814
aactgtcg	-0.6099	-1.2106
aactgtct	-0.4167	-0.3734
aactgtga	1.8225	1.1187
aactgtgc	1.2304	0.3775
aactgtgg	2.0777	1.4904
aactgtgt	-0.5312	-0.6622
aactgtta	-3.2507	-2.7375	aactgtta		aactgtta
aactgttc	0.0729	-0.7086
aactgttg	-0.9467	0.4653
aactgttt	-2.5726	-1.3124
aacttaaa	-0.7772	0.8134
aacttaac	-0.1421	0.3561
aacttaag	-0.393	0.6065
aacttaat	-2.5859	-0.6356
aacttaca	-1.0687	-0.6356
aacttacc	-1.7703	-0.8572
aacttacg	-1.3335	-0.9223
aacttact	-2.2568	-0.3328
aacttaga	-1.5516	0.6247
aacttagc	-0.0143	1.2736
aacttagg	-0.0783	1.2846
aacttagt	-2.7107	-0.6748
aacttata	-2.0914	-1.4761
aacttatc	-2.0783	-0.7337
aacttatg	-3.0731	-2.0337
aacttatt	-1.0717	1.5157
[truncated: 27,997 more rows]

## Sheet: PESE + PESS set 2
ctccagtc	4.1575	0.8228
ctccagtg	1.4334	1.142
ctccagtt	4.1196	2.5692
ctccataa	-0.9933	-0.793
ctccatac	-0.2671	-1.1037
ctccatag	-0.3431	-1.9233
ctccatat	-1.1936	-2.1927
ctccatca	1.0529	0.3104
ctccatcc	1.0457	-2.1395						Reference:
ctccatcg	0.603	-1.9101						Genes Dev. 2004 Jun 1;18(11):1241-50. Epub 2004 May 14. Links Computational definition of sequence motifs governing constitutive exon splicing. Zhang XH, Chasin LA. Department of Biological Sciences, MC2433, Columbia University, New York, New York 10027, USA. We have searched for sequence motifs that contribute to the recognition of human pre-mRNA splice sites by comparing the frequency of 8-mers…
ctccatct	0.8279	-0.0866
ctccatga	-1.4727	-1.9809
ctccatgc	-1.8902	-3.6685
ctccatgg	-0.1865	-1.4167
ctccatgt	-2.5087	-2.0762
ctccatta	-1.7013	-1.0302
ctccattc	-1.2312	-2.1855
ctccattg	1.7668	1.3188
ctccattt	-2.4113	-1.891
ctcccaaa	-4.8274	-0.0432
ctcccaac	-1.8303	0.02
ctcccaag	-1.8524	0.4895
ctcccaat	-2.0995	-1.3164
ctcccaca	-0.8082	-0.2538
ctcccacc	0.8865	0.456
ctcccacg	2.368	0.7195
ctcccact	2.6962	1.0313
ctcccaga	-0.8107	-0.0312
ctcccagc	1.3115	2.2787
ctcccagg	1.4487	1.2031
ctcccagt	2.2652	0.4559
ctcccata	-3.5117	-2.1004
ctcccatc	2.4423	-0.0473
ctcccatg	0.5283	0.352
ctcccatt	1.3774	-0.3375
ctccccaa	0.4138	-0.288
ctccccac	2.4313	-0.5596
ctccccag	2.1946	-0.7716
ctccccat	1.9296	0.7836
ctccccca	5.0227	0.6781
ctcccccc	3.5152	-0.8828
ctcccccg	5.9066	-3.0105	ctcccccg
ctccccct	4.9065	1.4881
ctccccga	5.9427	0.8575
ctccccgc	7.0064	-1.848
ctccccgg	5.8016	-1.1139
ctccccgt	3.5604	-0.6424
ctccccta	2.507	-0.6083
ctcccctc	5.0656	-1.199
ctcccctg	5.6096	0.2332
ctcccctt	2.7299	-1.9341
ctcccgaa	-2.0286	-0.7449
ctcccgac	0.0927	0.1772
ctcccgag	1.7975	1.4785
ctcccgat	0.1219	0.474
ctcccgca	2.7708	-2.3938
ctcccgcc	0.8848	-3.9558
ctcccgcg	2.8773	-1.8094
ctcccgct	5.14	-0.9889
ctcccgga	5.4271	1.2853
ctcccggc	7.4446	0.3072
ctcccggg	1.7788	-1.1437
ctcccggt	4.4368	0.8814
ctcccgta	2.8612	-0.6238
ctcccgtc	4.4923	0.2475
ctcccgtg	2.1577	0.6739
ctcccgtt	3.3216	-0.0325
ctccctaa	-2.3355	-0.5719
ctccctac	1.5596	-1.0672
ctccctag	0.8864	0.1762
ctccctat	-1.2967	-1.1521
ctccctca	2.0586	0.6478
ctccctcc	2.4176	-0.848
ctccctcg	2.962	-0.2362
ctccctct	0.3403	-1.5389
ctccctga	1.9334	0.1805
ctccctgc	3.1244	-0.3402
ctccctgg	3.2512	-0.4844
ctccctgt	1.9654	1.0312
ctccctta	0.566	-0.4976
ctcccttc	2.2304	-1.0086
ctcccttg	1.0344	0.0436
ctcccttt	2.0702	-0.0257
ctccgaaa	-1.6375	-0.0882
ctccgaac	1.8847	1.4833
ctccgaag	2.9531	1.3586
ctccgaat	0.147	0.6849
ctccgaca	3.8174	1.5243
ctccgacc	2.4003	0.2514
ctccgacg	5.3303	0.7381
ctccgact	4.8555	1.7931
ctccgaga	2.2937	1.1557
ctccgagc	3.837	-0.8909
ctccgagg	2.5242	-0.041
ctccgagt	3.3376	2.1932
ctccgata	2.1479	-0.5653
ctccgatc	0.9719	-0.996
ctccgatg	2.5714	0.4444
ctccgatt	2.9982	0.7334
ctccgcaa	1.8847	-1.1332
ctccgcac	0.2176	-2.9849
ctccgcag	4.7369	-2.1618
ctccgcat	2.7571	0.5495
ctccgcca	5.2331	-0.6223
ctccgccc	3.3062	-4.4573	ctccgccc
ctccgccg	7.0024	-2.612
ctccgcct	-1.1356	1.9874
ctccgcga	4.9365	-1.7408
ctccgcgc	4.0679	-4.3432	ctccgcgc
ctccgcgg	9.7408	-0.8482
ctccgcgt	7.3012	1.271
ctccgcta	3.7187	-1.2777
ctccgctc	5.3726	-0.3261
ctccgctg	5.465	-0.7712
ctccgctt	5.3887	0.0015
ctccggaa	1.6236	-0.3096
ctccggac	1.1007	-1.1606
ctccggag	4.4717	1.8796
ctccggat	3.999	1.2206
ctccggca	4.6502	-2.3865
ctccggcc	2.8282	-2.0109
ctccggcg	6.7542	-3.1602	ctccggcg
ctccggct	3.5829	-0.839
ctccggga	6.2007	-0.5581
ctccgggc	4.6227	-1.9267
ctccgggg	1.9955	-1.3338
ctccgggt	6.7087	1.5887
ctccggta	1.7603	-1.272
ctccggtc	5.4558	-0.3168
ctccggtg	3.943	0.6176
ctccggtt	4.9076	0.1724
ctccgtaa	-0.5698	-1.1096
ctccgtac	-0.9452	-1.1437
ctccgtag	3.3571	-0.3909
ctccgtat	0.3987	0.5256
ctccgtca	1.9325	1.8038
ctccgtcc	2.2915	-1.5176
ctccgtcg	2.61	0.403
ctccgtct	2.1995	0.9475
ctccgtga	4.049	1.0378
ctccgtgc	2.9754	-0.9458
ctccgtgg	2.6279	-0.3771
ctccgtgt	3.2387	2.579
ctccgtta	-1.2683	-1.1486
ctccgttc	0.6621	-0.7383
ctccgttg	4.7934	2.7289	ctccgttg	ctccgttg
ctccgttt	0.2842	-1.4668
ctcctaaa	-3.1067	-1.0789
ctcctaac	-1.9727	-0.5195
ctcctaag	-1.7533	0.7024
ctcctaat	-0.171	0.9255
ctcctaca	1.912	0.8029
ctcctacc	1.0898	2.2405
ctcctacg	0.948	-0.2333
ctcctact	3.6441	2.2096
ctcctaga	-0.6985	0.902
ctcctagc	0.5199	0.8173
ctcctagg	-1.8718	-0.5488
ctcctagt	-0.971	-0.2555
ctcctata	-0.7401	-1.3281
ctcctatc	1.0898	-0.363
ctcctatg	0.279	-0.4577
ctcctatt	-0.8835	-2.3752
ctcctcaa	2.245	0.5574
ctcctcac	1.6077	0.6682
ctcctcag	3.266	1.0575
ctcctcat	1.8353	-0.211
ctcctcca	3.3604	0.342
ctcctccc	4.0303	-0.2465
ctcctccg	4.8239	-1.297
ctcctcct	5.4289	2.2167
ctcctcga	3.694	0.89
ctcctcgc	3.5075	-0.7662
ctcctcgg	-0.5915	-0.8696
ctcctcgt	5.8136	0.2622
ctcctcta	0.7504	-2.1004
ctcctctc	2.1917	-1.0374
ctcctctg	4.474	2.2763
ctcctctt	3.4847	-0.2253
ctcctgaa	0.414	0.97
ctcctgac	-0.6085	3.0364
ctcctgag	-0.6775	1.4765
ctcctgat	0.1627	2.1158
ctcctgca	3.3887	-0.072
ctcctgcc	2.5973	2.0504
ctcctgcg	0.9666	0.6588
ctcctgct	5.7882	1.9744
ctcctgga	2.6404	3.1817	ctcctgga	ctcctgga
ctcctggc	-1.3654	-0.0405
ctcctggg	-0.9168	0.8165
ctcctggt	1.2358	3.8254
ctcctgta	-1.4344	-0.2476
ctcctgtc	0.593	1.0597
ctcctgtg	1.9164	2.2904
ctcctgtt	3.6498	3.5788	ctcctgtt	ctcctgtt
ctccttaa	1.4073	0.3775
ctccttac	-2.0985	-2.5178
ctccttag	0.6236	0.8373
ctccttat	-0.8987	-0.483
ctccttca	2.4018	0.9124
ctccttcc	4.4117	2.0042
ctccttcg	6.2091	1.57
ctccttct	3.2843	0.7446
ctccttga	0.8673	0.4546
ctccttgc	0.7582	-1.3512
ctccttgg	0.4139	1.6751
ctccttgt	-0.1122	0.3015
ctccttta	-0.7407	0.1162
ctcctttc	1.3543	-1.4871
ctcctttg	1.4745	1.862
ctcctttt	0.6424	0.0917
ctcgaaaa	2.7497	2.64	ctcgaaaa	ctcgaaaa
ctcgaaac	2.4639	2.5942
ctcgaaag	0.7422	-0.384
ctcgaaat	0.8131	2.629
ctcgaaca	0.6606	2.8437
ctcgaacc	0.3743	-0.4781
ctcgaacg	0.318	0.5186
ctcgaact	-2.433	1.3833
ctcgaaga	3.0489	3.5387	ctcgaaga	ctcgaaga
ctcgaagc	2.3157	-0.1536
ctcgaagg	2.7132	-0.0948
ctcgaagt	0.5222	2.3153
ctcgaata	0.5713	-0.2764
ctcgaatc	3.3495	1.0336
ctcgaatg	0.6621	2.0381
ctcgaatt	-2.0982	1.0716
ctcgacaa	2.461	2.3767
ctcgacac	2.3082	-0.2144
ctcgacag	2.2479	0.5934
ctcgacat	3.1521	2.7808	ctcgacat	ctcgacat
ctcgacca	3.599	2.1291
ctcgaccc	5.7529	-0.1433
ctcgaccg	2.3685	-0.7699
ctcgacct	0.9221	3.5728
ctcgacga	4.1177	1.5205
ctcgacgc	1.5664	-1.8697
ctcgacgg	9.8982	2.457
ctcgacgt	2.3987	1.1395
ctcgacta	0.4963	-0.3787
ctcgactc	3.4139	0.7816
ctcgactg	3.7557	0.7334
ctcgactt	1.2456	0.9707
ctcgagaa	1.3744	-0.0609
ctcgagac	3.6459	1.0697
ctcgagag	1.2386	1.37
ctcgagat	1.7288	2.6677
ctcgagca	1.9074	-0.6612
ctcgagcc	-0.4089	-3.2923
ctcgagcg	2.7246	-0.4781
ctcgagct	2.5908	1.0601
ctcgagga	5.465	3.4207	ctcgagga	ctcgagga
ctcgaggc	4.8799	-0.9196
ctcgaggg	1.3215	-1.2173
ctcgaggt	2.2413	0.7689
ctcgagta	0.7178	1.386
ctcgagtc	3.6291	1.5095
ctcgagtg	-0.5392	2.7438
ctcgagtt	2.9828	1.7197
ctcgataa	0.385	-0.2512
ctcgatac	-0.5231	-0.0805
ctcgatag	-0.1368	-1.35
ctcgatat	0.6249	1.7374
ctcgatca	-0.3068	0.4413
ctcgatcc	-0.2974	-2.0108
ctcgatcg	1.3307	-0.4904
ctcgatct	-0.6961	1.5243
ctcgatga	-1.4591	-1.0001
ctcgatgc	-1.0262	-2.1838
ctcgatgg	-1.1666	-0.9122
ctcgatgt	0.2901	1.3562
ctcgatta	-1.3011	0.9427
ctcgattc	0.9502	-0.5984
ctcgattg	0.4403	-0.4615
ctcgattt	1.3806	1.9334
ctcgcaaa	-2.2174	-0.3724
ctcgcaac	2.7246	-0.3787
ctcgcaag	0.2161	-1.2008
ctcgcaat	1.2925	-0.2051
ctcgcaca	-1.8846	-1.9781
ctcgcacc	0.8684	-1.0769
ctcgcacg	1.1206	-2.2331
ctcgcact	0.6678	0.2239
ctcgcaga	4.0464	0.2078
ctcgcagc	6.4898	-0.2994
ctcgcagg	4.3219	-0.2509
ctcgcagt	1.2657	-0.2901
ctcgcata	-0.7591	-1.8332
ctcgcatc	-0.1278	-2.0777
ctcgcatg	-0.4027	-1.8865
ctcgcatt	-1.0143	-0.6625
ctcgccaa	1.2036	-0.6961
ctcgccac	1.4046	-1.781
ctcgccag	4.5226	-1.5073
ctcgccat	-0.1478	-1.1867
ctcgccca	2.418	0.3105
ctcgcccc	1.9193	-4.155
ctcgcccg	3.8579	-3.1779	ctcgcccg
ctcgccct	1.0397	0.3186
ctcgccga	5.0585	-0.6377
ctcgccgc	3.9409	-4.4138	ctcgccgc
ctcgccgg	6.8878	-2.8617	ctcgccgg
ctcgccgt	4.5586	-0.3236
ctcgccta	-0.529	-2.115
ctcgcctc	0.8673	-1.2592
ctcgcctg	-1.2295	-2.5074
ctcgcctt	0.1598	-0.002
ctcgcgaa	0.2726	-1.2407
ctcgcgac	2.1849	-1.1096
ctcgcgag	0.948	0.0096
ctcgcgat	2.5667	1.6604
ctcgcgca	1.4877	-2.4858
ctcgcgcc	-1.2629	-3.882
ctcgcgcg	4.7129	-1.8726
ctcgcgct	2.2189	-0.6886
ctcgcgga	4.1177	-0.879
ctcgcggc	8.1096	-1.1401
ctcgcggg	4.0158	-2.1055
ctcgcggt	3.4228	-0.4494
ctcgcgta	0.0326	-1.6382
ctcgcgtc	1.3719	-1.9357
ctcgcgtg	1.9265	-1.075
ctcgcgtt	0.67	-0.4509
ctcgctaa	-0.9774	-0.8773
ctcgctac	0.4722	-1.0601
ctcgctag	0.1766	-1.5533
ctcgctat	-0.9446	-0.62
ctcgctca	-0.394	-1.0368
ctcgctcc	-0.4891	-3.5274
ctcgctcg	0.6393	-1.7984
ctcgctct	-1.7511	-0.9753
ctcgctga	2.0469	-0.5055
ctcgctgc	1.3044	-0.753
ctcgctgg	0.649	-2.1125
ctcgctgt	-0.0923	-0.6151
ctcgctta	0.7971	-1.1457
ctcgcttc	-0.3343	-2.291
ctcgcttg	-0.0925	-1.3104
ctcgcttt	-0.7608	-1.1401
ctcggaaa	2.6706	1.349
ctcggaac	3.9703	0.8149
ctcggaag	4.3016	0.4357
ctcggaat	1.0823	0.7014
ctcggaca	3.2824	0.2648
ctcggacc	5.5733	0.5779
ctcggacg	5.8183	0.5228
ctcggact	-0.6341	1.856
ctcggaga	4.588	1.645
ctcggagc	5.6787	0.0275
ctcggagg	1.9782	-1.4598
ctcggagt	2.5692	1.8466
ctcggata	1.472	1.5815
ctcggatc	3.5666	1.4377
ctcggatg	0.6545	-1.9275
ctcggatt	-1.5565	3.6429
ctcggcaa	1.0403	-0.6961
ctcggcac	2.2415	0.4803
ctcggcag	1.1605	-1.745
ctcggcat	0.1502	-0.1253
ctcggcca	-0.1655	-1.9026
ctcggccc	3.666	-1.8077
ctcggccg	4.5569	-1.1401
ctcggcct	-2.6116	2.5719
ctcggcga	2.2185	-1.4989
ctcggcgc	3.3258	-2.0572
ctcggcgg	4.3006	-2.0809
ctcggcgt	1.2189	0.3677
ctcggcta	0.8242	0.6029
ctcggctc	0.2956	1.8871
ctcggctg	5.0514	2.1893
ctcggctt	1.8365	1.3229
ctcgggaa	1.2001	0
ctcgggac	4.2684	0.9297
ctcgggag	2.5893	-1.4598
ctcgggat	1.9942	0.7751
ctcgggca	-0.6681	-2.6949
ctcgggcc	4.304	-1.8605
ctcgggcg	2.5667	-1.8119
ctcgggct	1.2741	-0.6179
ctcgggga	2.5113	-0.8518
ctcggggc	5.7936	-1.181
ctcggggg	1.7417	-1.9218
ctcggggt	2.1488	-0.0056
ctcgggta	-1.6758	-2.0188
ctcgggtc	2.7675	2.0278
ctcgggtg	1.9622	0.7367
ctcgggtt	0.3225	0.6029
ctcggtaa	1.3166	0.6278
ctcggtac	0.332	-0.6959
ctcggtag	-0.8376	-2.0309
ctcggtat	-0.9452	0.0902
ctcggtca	-1.8877	-1.0046
ctcggtcc	1.5215	-0.0344
ctcggtcg	1.6478	-0.3593
ctcggtct	-0.1569	0.0507
ctcggtga	1.9915	0.403
ctcggtgc	2.7974	-0.72
ctcggtgg	0.6069	0.6247
ctcggtgt	2.472	2.3481
ctcggtta	-0.5006	-0.292
ctcggttc	0.9045	1.4581
ctcggttg	2.7974	1.0328
ctcggttt	-1.6356	-0.4921
ctcgtaaa	2.3379	1.2448
ctcgtaac	-1.376	-1.0461
ctcgtaag	-1.7589	-0.7815
ctcgtaat	-0.6878	0.2602
ctcgtaca	0.332	-0.62
ctcgtacc	0.4452	-0.4494
ctcgtacg	3.5783	-0.1857
ctcgtact	-0.0178	-0.1771
ctcgtaga	0.0587	0.8297
ctcgtagc	2.0435	-0.5564
ctcgtagg	0.7283	0.1939
ctcgtagt	-0.714	-1.35
ctcgtata	-0.2614	-0.5374
ctcgtatc	1.0722	0.2389
ctcgtatg	-1.0099	-1.7777
ctcgtatt	-1.917	-2.3925
ctcgtcaa	2.874	0.7251
ctcgtcac	2.3727	1.0533
ctcgtcag	3.694	1.6782
ctcgtcat	2.0964	1.5429
ctcgtcca	2.15	-0.274
ctcgtccc	1.9999	-1.4968
ctcgtccg	4.4834	-1.4989
ctcgtcct	0.6158	-0.1909
ctcgtcga	4.0428	1.6523
ctcgtcgc	3.8716	-1.1135
ctcgtcgg	4.5586	0.7783
ctcgtcgt	3.8716	0.0293
ctcgtcta	1.7717	1.9749
ctcgtctc	-1.3017	-0.3032
ctcgtctg	2.8615	2.3851
ctcgtctt	-2.1712	-0.5183
ctcgtgaa	2.7136	2.1906
ctcgtgac	-2.6652	-0.4494
ctcgtgag	0.8337	1.3143
ctcgtgat	0.4041	1.6353
ctcgtgca	0.1765	-1.7741
ctcgtgcc	0.172	-0.6992
ctcgtgcg	1.9185	-0.62
ctcgtgct	2.0415	0.6139
ctcgtgga	3.7301	1.3733
ctcgtggc	-0.0987	0.8879
ctcgtggg	-0.9399	0.3857
ctcgtggt	0.1797	0.1939
ctcgtgta	1.8517	0.1376
ctcgtgtc	0.9081	0.988
ctcgtgtg	0.8346	-0.6886
ctcgtgtt	0.147	0.8116
ctcgttaa	1.5439	0.232
ctcgttac	-0.6679	-1.8332
ctcgttag	1.1349	1.4101
ctcgttat	-2.5722	-2.291
ctcgttca	0.2634	-1.1619
ctcgttcc	-0.8182	-2.2762
ctcgttcg	1.0676	-0.9809
ctcgttct	-1.8858	-2.1015
ctcgttga	-0.7398	0.9006
ctcgttgc	-0.3068	-1.8119
ctcgttgg	2.4651	2.109
ctcgttgt	-0.8027	-0.413
ctcgttta	-2.2895	-2.0188
ctcgtttc	-0.2848	-1.3975
ctcgtttg	1.2539	0.8105
ctcgtttt	0.0208	-0.3724
ctctaaaa	-1.9727	0.1422
ctctaaac	0.7784	1.0614
ctctaaag	-2.9632	-1.9173
ctctaaat	-1.1395	0.1805
ctctaaca	0.1105	0.4041
ctctaacc	0.9681	0.2205
ctctaacg	1.9667	1.2325
ctctaact	-0.9606	1.6939
ctctaaga	-1.6015	-1.0329
ctctaagc	0.3388	-0.1175
ctctaagg	-1.1694	0.0069
ctctaagt	-1.8099	-1.0424
ctctaata	-2.8098	-2.152
ctctaatc	-4.4292	0.502
ctctaatg	-2.0417	-1.8706
ctctaatt	-1.6358	-0.762
ctctacaa	0.5579	-0.0088
ctctacac	0.147	-0.7664
ctctacag	1.9539	0.2145
ctctacat	-0.7401	-1.0154
ctctacca	0.9895	-0.595
ctctaccc	1.2711	-1.7072
ctctaccg	2.2476	-0.5428
ctctacct	3.421	3.831	ctctacct	ctctacct
ctctacga	3.2824	1.3573
ctctacgc	1.6777	-0.5111
ctctacgg	3.4801	2.3062
ctctacgt	2.9299	0.7296
ctctacta	0.1303	0.1185
ctctactc	4.1543	0.8141
ctctactg	0.9814	-0.0132
ctctactt	0.8673	0.2514
ctctagaa	-1.1572	-0.6356
ctctagac	2.5843	1.7828
ctctagag	-0.0061	-0.793
ctctagat	0.467	0.9248
ctctagca	0.5364	-0.5463
ctctagcc	-0.7758	-2.6514
ctctagcg	0.8989	-0.1771
ctctagct	1.8234	-0.5867
ctctagga	1.9403	-0.6185
ctctaggc	0.309	-0.9122
ctctaggg	-1.7688	-2.4862
ctctaggt	1.2453	1.6964
ctctagta	-0.9578	-1.4025
ctctagtc	1.0823	0.9267
ctctagtg	-2.5364	-2.3792
ctctagtt	0.0045	0.9325
ctctataa	-2.3498	-1.8224
ctctatac	-0.8532	-1.8625
ctctatag	-2.4556	-2.057
ctctatat	-1.4507	-1.0888
ctctatca	-0.4339	0.755
ctctatcc	-0.4006	-0.1253
ctctatcg	0.4041	1.0499
ctctatct	-2.6257	-0.9894
ctctatga	-1.4053	-0.4318
ctctatgc	-0.4487	-1.4756
ctctatgg	-1.1996	-1.2794
ctctatgt	-2.8191	-0.7664
ctctatta	-3.8043	-2.5939
ctctattc	-1.3631	-1.5205
ctctattg	-0.0432	0.3904
ctctattt	-3.1368	-1.4031
ctctcaaa	-3.3044	-1.6724
ctctcaac	2.9677	1.6991
ctctcaag	0.3301	0.5198
ctctcaat	-1.7764	-0.6517
ctctcaca	1.9049	2.2231
ctctcacc	0.0981	0.2752
ctctcacg	2.9809	2.5234
ctctcact	-0.4525	0.4895
ctctcaga	1.1598	1.0396
ctctcagc	2.9337	1.0956
ctctcagg	2.2389	-0.5321
ctctcagt	0.2321	0.3356
ctctcata	-2.0158	-1.4956
ctctcatc	1.898	0.2436
ctctcatg	-2.1236	-1.7118
ctctcatt	-1.9632	-1.4715
ctctccaa	1.3037	0.4325
ctctccac	1.8244	-0.9898
ctctccag	2.2009	-2.2416
ctctccat	-0.9162	-2.7182
ctctccca	4.6733	1.8779
ctctcccc	4.1618	-1.8473
ctctcccg	7.3864	-0.0666
ctctccct	1.0524	0.0655
ctctccga	5.4558	1.37
ctctccgc	4.5307	-1.5894
ctctccgg	6.1206	-2.1326
ctctccgt	1.4752	-0.2611
ctctccta	2.5827	-0.1287
ctctcctc	2.6779	-1.6117
ctctcctg	1.5454	-0.8143
ctctcctt	1.825	0.2844
ctctcgaa	-0.676	0.1387
ctctcgac	2.5199	-0.7298
ctctcgag	0.0595	-0.6151
ctctcgat	1.4596	0.219
ctctcgca	1.8847	-1.5124
ctctcgcc	0.1194	-1.7348
ctctcgcg	2.5954	-1.8706
ctctcgct	-0.61	-1.2009
ctctcgga	6.9123	0.6124
ctctcggc	2.9951	-0.4549
ctctcggg	4.2538	0.8586
ctctcggt	0.4149	-1.0777
ctctcgta	-1.1372	-2.6085
ctctcgtc	1.1833	-1.5474
ctctcgtg	0.0921	-2.0337
ctctcgtt	0.5187	0.231
ctctctaa	-2.4559	-2.2323
ctctctac	1.0105	-0.6404
ctctctag	0.2237	-1.5711
ctctctat	-3.9257	-2.0455
ctctctca	-1.6542	0
ctctctcc	0.6743	-1.1233
ctctctcg	0.5384	-0.7701
ctctctct	-2.6601	-2.5733
ctctctga	2.4758	0.1892
ctctctgc	2.6984	-0.4199
ctctctgg	0.4005	-1.2788
ctctctgt	-1.3178	0.5932
ctctctta	-0.9208	-0.0887
ctctcttc	1.3491	-0.6905
ctctcttg	-0.7626	-1.0838
ctctcttt	-3.6145	-2.0487
ctctgaaa	0.1899	1.3577
ctctgaac	0.5073	-0.3198
ctctgaag	1.895	1.7382
ctctgaat	-0.4914	0.9793
ctctgaca	1.7975	0.5075
ctctgacc	2.9515	1.0261
ctctgacg	3.7071	2.849	ctctgacg	ctctgacg
ctctgact	1.6006	0.5403
ctctgaga	1.3855	0.1001
ctctgagc	2.8335	-0.7798
ctctgagg	1.8489	-0.1642
ctctgagt	0.0812	1.6042
ctctgata	0.4677	-0.0361
ctctgatc	3.6794	2.6075
ctctgatg	0.8287	-0.1091
ctctgatt	0.8289	1.5274
ctctgcaa	0.3973	-0.5185
ctctgcac	2.1152	-0.6586
ctctgcag	3.3976	0.495
ctctgcat	0.5241	1.3072
ctctgcca	5.3492	3.1201	ctctgcca	ctctgcca
ctctgccc	4.5357	0.3033
ctctgccg	4.9608	-0.3197
ctctgcct	-0.0734	2.7111
ctctgcga	5.9066	0.2764
ctctgcgc	5.2522	-1.4395
ctctgcgg	5.5808	0.4042
ctctgcgt	4.3359	2.7392	ctctgcgt	ctctgcgt
ctctgcta	3.4957	1.1016
ctctgctc	4.0468	0.7537
ctctgctg	7.0459	4.9992	ctctgctg	ctctgctg
ctctgctt	2.1248	1.8552
ctctggaa	-0.1693	-1.7241
ctctggac	3.0002	0.8214
ctctggag	2.4329	0.0178
ctctggat	1.5946	1.6918
ctctggca	0.6669	-1.564
ctctggcc	2.907	-1.1767
ctctggcg	2.9102	0.9394
ctctggct	2.3375	0.961
ctctggga	-0.0968	-0.0872
ctctgggc	1.669	-2.979
ctctgggg	1.4311	-2.0109
ctctgggt	2.313	0.1559
ctctggta	-0.9966	-1.778
ctctggtc	2.2295	-0.6753
ctctggtg	1.8528	0.8918
ctctggtt	0.4692	0.2089
ctctgtaa	-1.4869	1.0878
ctctgtac	-0.8686	-1.4204
ctctgtag	-0.5115	0.2383
ctctgtat	-3.1919	-1.4086
ctctgtca	-1.2576	1.4996
ctctgtcc	0.9919	1.058
ctctgtcg	2.3692	2.9839
ctctgtct	-3.0801	-0.917
ctctgtga	0.8643	0.5819
ctctgtgc	3.6836	1.4946
ctctgtgg	4.0864	2.5474
ctctgtgt	-0.0671	1.1187
ctctgtta	-2.2716	-0.4551
ctctgttc	1.1121	1.332
ctctgttg	-1.098	0.4943
ctctgttt	-0.7757	0.8823
ctcttaaa	-2.4305	-0.4396
ctcttaac	-1.1131	-0.9809
ctcttaag	-2.7175	-0.5453
ctcttaat	-3.4134	-1.2632
ctcttaca	-0.6478	0.3249
ctcttacc	0.3335	0.4943
ctcttacg	-0.0698	-0.1448
ctcttact	0.2147	0.7382
ctcttaga	-0.8094	0.89
ctcttagc	0.645	0.236
ctcttagg	-1.5358	-0.4524
ctcttagt	-2.0381	-1.1488
ctcttata	-1.0567	-0.4022
ctcttatc	0.575	-0.1703
ctcttatg	-3.1068	-2.1681
ctcttatt	-2.449	-0.4976
ctcttcaa	1.9525	1.7113
ctcttcac	2.1854	0.4415
ctcttcag	1.6157	1.7091
ctcttcat	-0.5213	0.2545
ctcttcca	3.9543	0.6681
ctcttccc	2.5628	-0.5527
ctcttccg	4.5721	1.2023
ctcttcct	2.0346	0.5735
ctcttcga	4.0736	2.3659
ctcttcgc	1.3132	-1.2158
ctcttcgg	3.1469	0.7443
ctcttcgt	1.4752	0.6729
ctcttcta	1.1055	1.9757
ctcttctc	1.0704	0.8337
ctcttctg	1.4648	0.3036
ctcttctt	0.8664	0.2566
ctcttgaa	-1.5116	0.4433
ctcttgac	-1.384	-0.6179
ctcttgag	-1.3732	0.4942
ctcttgat	0.3095	2.7012
ctcttgca	1.0299	-0.4239
ctcttgcc	-1.2169	0.4685
ctcttgcg	0.7019	-1.0629
ctcttgct	-0.286	0.8006
ctcttgga	3.5515	2.6797	ctcttgga	ctcttgga
ctcttggc	-1.5456	-0.1091
ctcttggg	-1.4344	-0.9087
ctcttggt	-0.0308	1.09
ctcttgta	-0.7891	-0.6208
ctcttgtc	-0.9296	-0.0361
ctcttgtg	-1.345	-0.371
ctcttgtt	-0.956	0.2936
ctctttaa	-2.9413	-1.8151
ctctttac	-2.1656	-2.1584
ctctttag	-1.1385	-0.7701
ctctttat	-3.9785	-2.4125
ctctttca	-0.6568	0.8064
ctctttcc	0.1281	-1.6293
ctctttcg	0.7798	0.7148
ctctttct	-3.2969	-1.4054
ctctttga	0.6905	0.0585
ctctttgc	1.6133	-0.2546
ctctttgg	-1.1181	0.6041
ctctttgt	-1.0411	0.6063
ctctttta	-2.2955	-1.7185
ctcttttc	-0.8424	-1.2796
ctcttttg	-0.0356	0.2134
ctcttttt	-4.4715	-1.4744
ctgaaaaa	4.9303	5.7022	ctgaaaaa	ctgaaaaa
ctgaaaac	2.7862	1.8304
ctgaaaag	2.8463	1.8345
ctgaaaat	-0.9162	0.015
ctgaaaca	1.5974	1.9783
ctgaaacc	-0.6838	0.9433
ctgaaacg	1.3628	0.1883
ctgaaact	0.2712	-0.1661
ctgaaaga	3.4101	3.2928	ctgaaaga	ctgaaaga
ctgaaagc	3.1021	2.4912
ctgaaagg	0.6778	1.1207
ctgaaagt	-1.0904	-0.2927
ctgaaata	-1.2559	0.2764
ctgaaatc	-2.5289	1.2817
ctgaaatg	-2.1415	-0.4077
ctgaaatt	-1.1086	-0.0861
ctgaacaa	6.498	6.0805	ctgaacaa	ctgaacaa
ctgaacac	3.1017	2.3673
ctgaacag	5.4086	3.1162	ctgaacag	ctgaacag
ctgaacat	1.7318	1.2869
ctgaacca	3.8039	1.7534
ctgaaccc	3.3571	2.022
ctgaaccg	2.6357	-0.2997
ctgaacct	1.2595	-0.5346
ctgaacga	4.9473	3.4427	ctgaacga	ctgaacga
ctgaacgc	4.049	1.3143
ctgaacgg	4.3444	1.8533
ctgaacgt	0.6629	1.2333
ctgaacta	2.246	4.0644
ctgaactc	0.6178	1.8345
ctgaactg	3.8007	3.4143	ctgaactg	ctgaactg
ctgaactt	1.0704	3.2511
ctgaagaa	9.7598	8.1816	ctgaagaa	ctgaagaa
ctgaagac	11.1816	9.2304	ctgaagac	ctgaagac
ctgaagag	9.5317	9.6175	ctgaagag	ctgaagag
ctgaagat	6.1325	4.6859	ctgaagat	ctgaagat
ctgaagca	6.0056	5.7157	ctgaagca	ctgaagca
ctgaagcc	3.7416	2.2497
ctgaagcg	3.1956	0.877
ctgaagct	3.9238	2.2363
ctgaagga	9.9949	8.0131	ctgaagga	ctgaagga
ctgaaggc	5.1007	2.6063
ctgaaggg	5.4246	2.9942	ctgaaggg	ctgaaggg
ctgaaggt	4.5613	4.6806	ctgaaggt	ctgaaggt
ctgaagta	4.485	7.5433	ctgaagta	ctgaagta
ctgaagtc	3.4513	2.0504
ctgaagtg	1.7489	3.5848
ctgaagtt	2.7301	2.5451
ctgaataa	2.8209	3.3882	ctgaataa	ctgaataa
ctgaatac	0.9589	1.0575
ctgaatag	1.7765	2.8705
ctgaatat	-0.5369	1.3441
ctgaatca	0.6741	2.1327
ctgaatcc	1.0105	0.4523
ctgaatcg	0.4452	-0.727
ctgaatct	2.2923	2.8904
ctgaatga	-0.5315	1.4972
ctgaatgc	-0.2212	-0.783
ctgaatgg	-0.6962	0.264
ctgaatgt	-1.345	0.1628
ctgaatta	-0.6197	1.3023
ctgaattc	1.5123	0.9816
ctgaattg	0.0294	1.0035
ctgaattt	-0.7399	1.4524
ctgacaaa	3.7622	1.9937
ctgacaac	3.0992	2.2703
ctgacaag	5.2497	4.1819	ctgacaag	ctgacaag
ctgacaat	0.5071	1.1309
ctgacaca	0.0175	0.3356
ctgacacc	1.9494	2.3822
ctgacacg	3.0707	1.7007
ctgacact	1.3044	0.9565
ctgacaga	2.2848	2.2764
ctgacagc	5.6778	2.7012	ctgacagc	ctgacagc
ctgacagg	1.4984	0.0737
ctgacagt	1.107	0.0178
ctgacata	-0.2817	1.59
ctgacatc	2.1255	1.9916
ctgacatg	2.1066	2.7392
ctgacatt	0.4406	1.9916
ctgaccaa	1.4374	1.1765
ctgaccac	0.7986	1.7184
ctgaccag	7.1886	3.7926	ctgaccag	ctgaccag
ctgaccat	0.3062	1.7042
ctgaccca	4.4346	2.1428
ctgacccc	1.5665	0.1179
ctgacccg	5.4755	0.8101
ctgaccct	2.5277	1.2383
ctgaccga	5.4012	3.7905	ctgaccga	ctgaccga
ctgaccgc	1.2769	0.6353
ctgaccgg	6.7909	1.6506
ctgaccgt	2.5519	1.0761
ctgaccta	1.3798	3.5329
ctgacctc	1.4036	4.2257
ctgacctg	4.1199	5.9359	ctgacctg	ctgacctg
ctgacctt	1.6597	4.1386
ctgacgaa	5.2668	6.3491	ctgacgaa	ctgacgaa
ctgacgac	6.2468	4.2711	ctgacgac	ctgacgac
ctgacgag	5.1374	2.6588	ctgacgag	ctgacgag
ctgacgat	3.1521	2.1909
ctgacgca	0.7422	-0.7943
ctgacgcc	1.2803	-0.4168
ctgacgcg	2.4779	-1.1455
ctgacgct	2.0079	-0.5195
ctgacgga	5.3302	1.2125
ctgacggc	9.5996	3.6797	ctgacggc	ctgacggc
ctgacggg	5.7131	1.3733
ctgacggt	1.5988	0.3886
ctgacgta	1.6937	1.7384
ctgacgtc	1.8234	3.2437
ctgacgtg	4.5795	2.8921	ctgacgtg	ctgacgtg
ctgacgtt	2.107	2.354
ctgactaa	-0.163	1.4848
ctgactac	2.664	2.781	ctgactac	ctgactac
ctgactag	2.4516	2.7749
ctgactat	-0.3947	0.502
ctgactca	0.4809	2.349
ctgactcc	1.9664	1.3812
ctgactcg	2.2046	1.0925
ctgactct	1.9064	0.2438
ctgactga	4.4346	2.3073
ctgactgc	2.9309	2.4552
ctgactgg	2.3299	1.6593
ctgactgt	1.3798	1.6598
ctgactta	0.3309	0.7597
ctgacttc	2.7985	4.0506	ctgacttc	ctgacttc
ctgacttg	2.1518	2.252
ctgacttt	0.3945	1.215
ctgagaaa	2.9364	2.6677	ctgagaaa	ctgagaaa
ctgagaac	4.929	2.7061	ctgagaac	ctgagaac
ctgagaag	6.885	5.336	ctgagaag	ctgagaag
ctgagaat	0.1754	0.0904
ctgagaca	3.4797	3.0106	ctgagaca	ctgagaca
ctgagacc	4.7924	1.8841
ctgagacg	1.4088	0.2082
ctgagact	-1.0996	-0.4568
ctgagaga	3.5128	2.4213
ctgagagc	3.0076	0.7697
ctgagagg	2.6648	0.7831
ctgagagt	0.2868	2.0715
ctgagata	1.2639	1.449
ctgagatc	2.9977	2.1966
ctgagatg	-0.6583	-1.337
ctgagatt	-2.7902	0.2265
ctgagcaa	3.9692	2.1096
ctgagcac	3.9	2.8042	ctgagcac	ctgagcac
ctgagcag	6.4902	2.8687	ctgagcag	ctgagcag
ctgagcat	3.6081	1.3318
ctgagcca	2.4072	0.26
ctgagccc	5.424	-0.0361
ctgagccg	4.418	-1.8337
ctgagcct	-1.3007	0.923
ctgagcga	4.8841	0.8983
ctgagcgc	3.1953	0.0318
ctgagcgg	4.642	0.1856
ctgagcgt	3.7819	1.1522
ctgagcta	1.2386	-0.4396
ctgagctc	0.0282	1.364
ctgagctg	7.3713	2.2553
ctgagctt	0.974	0.5133
ctgaggaa	5.1011	5.112	ctgaggaa	ctgaggaa
ctgaggac	4.8827	4.0747	ctgaggac	ctgaggac
ctgaggag	6.7024	4.2158	ctgaggag	ctgaggag
ctgaggat	3.8531	4.3911	ctgaggat	ctgaggat
ctgaggca	-0.2762	-1.6776
ctgaggcc	5.7122	3.7507	ctgaggcc	ctgaggcc
ctgaggcg	1.7615	-0.1739
ctgaggct	2.9185	0.045
ctgaggga	1.392	0.771
ctgagggc	4.5208	0.9464
ctgagggg	1.8746	-0.0473
ctgagggt	1.9605	1.3322
ctgaggta	-1.2813	-1.1181
ctgaggtc	3.7179	1.2383
ctgaggtg	0.8442	1.4041
ctgaggtt	1.9891	2.5097
ctgagtaa	1.1499	2.9295
ctgagtac	2.8282	2.7335	ctgagtac	ctgagtac
ctgagtag	2.0823	3.5153
ctgagtat	0.4261	2.0629
ctgagtca	1.2303	1.0404
ctgagtcc	2.7359	0.7958
ctgagtcg	2.3311	1.5154
ctgagtct	2.217	1.1305
ctgagtga	1.7977	1.1387
ctgagtgc	1.0212	1.2029
ctgagtgg	1.124	1.5313
ctgagtgt	-0.2658	1.1477
ctgagtta	-1.1065	-0.0344
ctgagttc	0.9763	1.1597
ctgagttg	2.4662	2.501
ctgagttt	0.8937	2.4962
ctgataaa	0.783	1.0372
ctgataac	-0.5427	0.6201
ctgataag	0.9238	1.6079
ctgataat	-2.081	-1.0106
ctgataca	0.3576	1.2825
ctgatacc	0.6629	0.6729
ctgatacg	-1.2015	-0.8421
ctgatact	-0.3155	-0.1881
ctgataga	-0.1203	1.2373
ctgatagc	0.8337	0.8879
ctgatagg	-0.2894	0.2111
ctgatagt	-1.5154	-0.1253
ctgatata	-2.1988	0.1387
ctgatatc	0.2183	1.6004
ctgatatg	-2.3441	-0.7593
ctgatatt	-3.3535	-0.1571
ctgatcaa	2.1711	1.9022
ctgatcac	-0.43	1.9378
ctgatcag	2.9691	2.1747
ctgatcat	-0.1209	2.1199
ctgatcca	2.7565	1.5553
ctgatccc	3.6334	2.9554	ctgatccc	ctgatccc
ctgatccg	1.1728	0.2556
ctgatcct	1.0114	0.0936
ctgatcga	3.5113	1.449
ctgatcgc	2.15	1.449
ctgatcgg	4.5559	3.9955	ctgatcgg	ctgatcgg
ctgatcgt	2.161	3.0019
ctgatcta	-1.146	0.4831
ctgatctc	-1.2035	2.769
ctgatctg	4.6591	3.6656	ctgatctg	ctgatctg
ctgatctt	-0.0059	4.3228
ctgatgaa	3.2917	4.3013	ctgatgaa	ctgatgaa
ctgatgac	1.4052	1.506
ctgatgag	2.8238	1.5834
ctgatgat	0.0111	1.7473
ctgatgca	-0.6718	-1.9618
ctgatgcc	0.2798	-2.0182
ctgatgcg	-0.1089	-1.6749
ctgatgct	0.7582	-0.7135
ctgatgga	0.3056	-0.2544
ctgatggc	1.706	1.6506
ctgatggg	1.1585	0.5343
ctgatggt	-0.6239	-0.4158
ctgatgta	-0.3443	0.1029
ctgatgtc	-1.0101	-0.2093
ctgatgtg	1.056	3.4946
ctgatgtt	-1.4428	0.3183
ctgattaa	0.3305	1.3973
ctgattac	1.0905	3.2215
ctgattag	1.3318	3.389
ctgattat	0.6112	1.1175
ctgattca	1.4004	2.8407
ctgattcc	0.9238	0.4523
ctgattcg	2.8134	1.887
ctgattct	1.0898	1.3562
ctgattga	2.2926	4.2864
ctgattgc	1.1655	2.0098
ctgattgg	3.1654	2.8629	ctgattgg	ctgattgg
ctgattgt	-0.0871	3.2821
ctgattta	-2.072	-0.2583
ctgatttc	0.1871	0.3578
ctgatttg	-0.0112	3.0484
ctgatttt	-3.6158	0.6369
ctgcaaaa	0.0405	0.9055
ctgcaaac	0.6999	2.0483
ctgcaaag	3.5572	1.9937
ctgcaaat	0.9998	-0.1755
ctgcaaca	1.1336	0.0046
ctgcaacc	0.6316	2.4843
ctgcaacg	0.5755	-0.2672
ctgcaact	2.3578	1.4058
ctgcaaga	2.0568	0.9091
ctgcaagc	2.936	2.2635
ctgcaagg	2.6443	2.3443
ctgcaagt	2.353	1.9757
ctgcaata	-0.8259	0.1975
ctgcaatc	-5.2052	-1.227
ctgcaatg	-1.115	0.0507
ctgcaatt	-0.8484	0.1805
ctgcacaa	3.5419	2.0282
ctgcacac	1.196	-0.0194
ctgcacag	2.9717	-0.2235
ctgcacat	-0.7405	-0.783
ctgcacca	3.6472	0.5235
ctgcaccc	3.0423	0.1071
ctgcaccg	3.4334	-2.5814
ctgcacct	3.6554	0.8058
ctgcacga	5.1573	-0.2505
ctgcacgc	2.9646	-2.6196
ctgcacgg	6.1813	0.0646
ctgcacgt	0.2166	-1.2794
ctgcacta	0.309	-0.2008
ctgcactc	2.7331	0.9055
ctgcactg	3.6344	1.1346
ctgcactt	-0.9331	0.5036
ctgcagaa	8.0723	5.3952	ctgcagaa	ctgcagaa
ctgcagac	5.4943	2.5915
ctgcagag	6.2681	2.2062
ctgcagat	2.57	3.2771
ctgcagca	6.3325	0.2062
ctgcagcc	3.8825	-0.7127
ctgcagcg	6.7916	0.4332
ctgcagct	7.6892	1.4605
ctgcagga	4.7528	1.019
ctgcaggc	7.1627	0.3445
ctgcaggg	3.8377	-1.5547
ctgcaggt	3.7518	0.185
ctgcagta	2.9147	1.9511
ctgcagtc	2.6799	-0.1986
ctgcagtg	1.1318	3.032
ctgcagtt	2.7815	2.0908
ctgcataa	-0.6717	0.8885
ctgcatac	-1.8605	-0.822
ctgcatag	0.9256	0.4971
ctgcatat	-1.3561	-0.793
ctgcatca	-0.3154	1.6487
ctgcatcc	0.1537	1.7574
ctgcatcg	1.6424	0.5695
ctgcatct	2.0229	-0.3477
ctgcatga	0.2237	-0.9196
ctgcatgc	-1.244	-3.0817
ctgcatgg	1.4374	-0.1097
ctgcatgt	-2.1696	-0.8971
ctgcatta	-1.5375	0.749
ctgcattc	0.0644	-0.3198
ctgcattg	-1.6425	0.4507
ctgcattt	0.4881	1.8903
ctgccaaa	-1.3351	0.5465
ctgccaac	3.558	2.38
ctgccaag	1.4756	1.8167
ctgccaat	2.5849	1.797
ctgccaca	3.0449	3.6011	ctgccaca	ctgccaca
ctgccacc	1.6545	2.1404
ctgccacg	4.2642	2.5374
ctgccact	5.6505	2.2104
ctgccaga	2.4823	2.1961
ctgccagc	7.2918	3.7054	ctgccagc	ctgccagc
ctgccagg	4.5558	1.9561
ctgccagt	2.4953	0.7002
ctgccata	0.8684	0.3382
ctgccatc	3.9799	2.318
ctgccatg	-1.0863	0.1241
ctgccatt	2.5069	0.5927
ctgcccaa	2.5805	1.2304
ctgcccac	4.3588	2.3166
ctgcccag	2.7942	1.7578
ctgcccat	0.4438	1.4542
ctgcccca	4.2079	1.2228
ctgccccc	3.6166	-0.541
ctgccccg	4.9681	-1.3726
ctgcccct	4.3003	-0.4112
ctgcccga	4.3659	0.3552
ctgcccgc	7.1783	-0.5124
ctgcccgg	5.3632	-0.2789
ctgcccgt	3.4429	-0.1703
ctgcccta	2.2478	0.408
ctgccctc	3.0282	1.1349
ctgccctg	8.085	3.8343	ctgccctg	ctgccctg
ctgccctt	4.5745	1.764
ctgccgaa	4.3409	1.9644
ctgccgac	4.9916	1.1783
ctgccgag	5.3632	2.3443
ctgccgat	1.9926	1.0648
ctgccgca	2.2684	-1.0322
ctgccgcc	5.9296	-1.9627
ctgccgcg	4.6387	-2.832	ctgccgcg
ctgccgct	7.9031	0.3253
ctgccgga	5.1099	-1.3419
ctgccggc	9.0874	0.7351
ctgccggg	4.2736	0.3507
ctgccggt	5.4558	-0.1137
ctgccgta	1.4101	-0.128
ctgccgtc	8.4357	0.6931
ctgccgtg	1.9579	0.0903
ctgccgtt	4.7643	1.7109
ctgcctaa	-1.9852	-0.0887
ctgcctac	1.4275	2.6725
ctgcctag	0.4692	1.7002
ctgcctat	1.5906	0.9719
ctgcctca	0.454	3.6767
ctgcctcc	1.4086	2.0835
ctgcctcg	1.0843	2.2978
ctgcctct	2.8421	2.1161
ctgcctga	3.1003	1.8742
ctgcctgc	5.0579	1.8305
ctgcctgg	1.7213	0.4678
ctgcctgt	2.909	2.6393	ctgcctgt	ctgcctgt
ctgcctta	-0.3859	1.2572
ctgccttc	2.4584	1.2272
ctgccttg	0.9577	3.9241
ctgccttt	1.3065	-0.0361
ctgcgaaa	1.9622	1.6658
ctgcgaac	1.5795	-0.0933
ctgcgaag	5.0789	2.0402
ctgcgaat	-0.6315	-0.8419
ctgcgaca	4.1342	0.9591
ctgcgacc	3.0995	2.1253
ctgcgacg	7.2931	0.5831
ctgcgact	0.0045	-0.1365
ctgcgaga	5.3114	2.0492
ctgcgagc	5.3354	1.2365
ctgcgagg	3.6478	0.352
ctgcgagt	2.8899	0.088
ctgcgata	-0.0014	0.1633
ctgcgatc	2.3007	0.7014
ctgcgatg	0.4149	-1.0777
ctgcgatt	-3.5885	-0.9655
ctgcgcaa	3.5288	-0.0315
ctgcgcac	4.2981	-0.0402
ctgcgcag	5.3217	0.3797
ctgcgcat	2.0985	0.2025
ctgcgcca	6.468	-0.2702
ctgcgccc	4.7098	-2.0939
ctgcgccg	6.2027	-3.632	ctgcgccg
ctgcgcct	2.2478	-1.7524
ctgcgcga	5.022	-1.096
ctgcgcgc	2.4354	-3.3489
ctgcgcgg	8.2951	-1.4996
ctgcgcgt	1.5203	-1.8378
ctgcgcta	1.5297	-0.062
ctgcgctc	0.3057	-1.8245
ctgcgctg	8.7032	2.6928	ctgcgctg	ctgcgctg
ctgcgctt	2.2127	-0.3356
ctgcggaa	2.7856	0.5469
ctgcggac	6.9338	2.0284
ctgcggag	10.9306	3.2657	ctgcggag	ctgcggag
ctgcggat	4.8789	0.9273
ctgcggca	5.4321	-0.9655
ctgcggcc	9.1472	-2.0951
ctgcggcg	6.7058	-2.947	ctgcggcg
ctgcggct	4.7863	-1.6619
ctgcggga	3.6163	-2.1674
ctgcgggc	6.7291	-0.9648
ctgcgggg	7.2649	-1.824
ctgcgggt	1.8028	-1.1941
ctgcggta	1.0456	-2.1338
ctgcggtc	3.1391	-0.7445
ctgcggtg	5.346	1.127
ctgcggtt	2.6875	0.236
ctgcgtaa	0.3078	0.4269
ctgcgtac	0.7971	-0.502
ctgcgtag	3.6166	2.068
ctgcgtat	-1.5791	-1.0754
ctgcgtca	-0.4339	0.8559
ctgcgtcc	4.1375	1.8264
ctgcgtcg	4.2953	0.2424
ctgcgtct	5.4519	0.5696
ctgcgtga	2.9261	0.4066
ctgcgtgc	1.2054	-1.325
ctgcgtgg	5.3505	3.0649	ctgcgtgg	ctgcgtgg
ctgcgtgt	1.1007	-0.3482
ctgcgtta	-0.3253	0.5527
ctgcgttc	-0.5957	-0.274
ctgcgttg	1.3752	2.1571
ctgcgttt	0.0017	0.3432
ctgctaaa	1.5276	0.7644
ctgctaac	-0.3685	1.5729
ctgctaag	0.6638	-0.0618
ctgctaat	-2.2429	-0.0305
ctgctaca	1.8685	2.3848
ctgctacc	3.5435	2.2752
ctgctacg	4.306	1.1823
ctgctact	4.205	0.6261
ctgctaga	-0.061	0.3561
ctgctagc	1.9026	1.4991
ctgctagg	0.787	0.1283
ctgctagt	-0.135	-0.3121
ctgctata	-1.3453	0.0618
ctgctatc	-0.5393	-0.6238
ctgctatg	-0.4155	0.6065
ctgctatt	-0.5163	-0.0353
ctgctcaa	1.9049	0.4132
ctgctcac	1.2022	2.3251
ctgctcag	5.4086	2.796	ctgctcag	ctgctcag
ctgctcat	1.4712	0.1394
ctgctcca	4.6867	0.7972
ctgctccc	6.7179	0.1101
ctgctccg	8.5254	0.8147
ctgctcct	7.6725	1.2074
ctgctcga	3.5113	0.0986
ctgctcgc	3.2163	-0.1856
ctgctcgg	6.8279	1.6487
ctgctcgt	4.3697	0.3778
ctgctcta	2.8614	1.8588
ctgctctc	4.9909	2.9973	ctgctctc	ctgctctc
ctgctctg	4.31	3.607	ctgctctg	ctgctctg
ctgctctt	0.4325	1.8161
ctgctgaa	5.5571	4.3229	ctgctgaa	ctgctgaa
ctgctgac	2.8321	0.96
ctgctgag	7.5517	5.4043	ctgctgag	ctgctgag
ctgctgat	4.5006	2.2202
ctgctgca	3.9595	-1.5799
ctgctgcc	6.0588	1.1751
ctgctgcg	6.5291	-1.0212
ctgctgct	5.7212	-0.0039
ctgctgga	6.0784	0.7533
ctgctggc	3.8228	0.4852
ctgctggg	1.0432	0.5875
ctgctggt	4.104	2.514
ctgctgta	3.5097	3.2125	ctgctgta	ctgctgta
ctgctgtc	5.2516	1.5405
ctgctgtg	5.3942	4.9258	ctgctgtg	ctgctgtg
ctgctgtt	4.0898	3.44	ctgctgtt	ctgctgtt
ctgcttaa	-0.153	1.1185
ctgcttac	1.1454	0.6543
ctgcttag	2.3553	1.3932
ctgcttat	-1.802	-0.8793
ctgcttca	1.8952	2.26
ctgcttcc	2.3268	0.2623
ctgcttcg	2.6427	2.0282
ctgcttct	4.2648	1.1816
ctgcttga	1.6435	1.4601
ctgcttgc	2.442	0.394
ctgcttgg	2.6509	2.6943	ctgcttgg	ctgcttgg
ctgcttgt	0.1779	-0.1611
ctgcttta	-1.2114	0.7149
ctgctttc	-0.4777	-0.0014
ctgctttg	2.1191	3.9011
ctgctttt	-0.1344	0.6974
ctggaaaa	2.8594	1.7889
ctggaaac	1.8795	0.6378
ctggaaag	3.4193	3.3062	ctggaaag	ctggaaag
ctggaaat	1.8722	2.8711
ctggaaca	3.9301	3.2415	ctggaaca	ctggaaca
ctggaacc	3.074	1.3562
ctggaacg	1.9469	0.8591
ctggaact	-1.1847	2.2221
ctggaaga	4.7672	5.3576	ctggaaga	ctggaaga
ctggaagc	5.831	2.0513
ctggaagg	3.0658	0.8548
ctggaagt	3.6865	3.8493	ctggaagt	ctggaagt
ctggaata	2.3806	4.303
ctggaatc	-2.0236	3.2939
ctggaatg	-1.5585	1.7662
ctggaatt	-2.1072	2.788
ctggacaa	3.5103	2.1569
ctggacac	3.8674	3.0484	ctggacac	ctggacac
ctggacag	1.6613	1.9291
ctggacat	0.3304	2.4598
ctggacca	4.2642	1.4112
ctggaccc	5.8493	0.2163
ctggaccg	4.4287	-0.0118
ctggacct	3.8331	2.139
ctggacga	7.3481	4.3265	ctggacga	ctggacga
ctggacgc	4.5848	0.3186
ctggacgg	4.0464	0.5469
ctggacgt	3.8928	1.9559
ctggacta	0.9927	1.9022
ctggactc	-0.0346	2.726
ctggactg	3.4766	4.1416	ctggactg	ctggactg
ctggactt	-0.2453	2.8113
ctggagaa	6.2797	7.4258	ctggagaa	ctggagaa
ctggagac	2.6799	1.5473
ctggagag	3.0009	4.2818	ctggagag	ctggagag
ctggagat	4.0957	3.7481	ctggagat	ctggagat
ctggagca	6.5404	2.0527
ctggagcc	5.3632	-0.2857
ctggagcg	1.9264	1.506
ctggagct	5.7531	1.5599
ctggagga	7.6665	4.7325	ctggagga	ctggagga
ctggaggc	5.6164	1.5205
ctggaggg	3.2308	4.1625	ctggaggg	ctggaggg
ctggaggt	5.1505	4.1847	ctggaggt	ctggaggt
ctggagta	2.8358	6.0953	ctggagta	ctggagta
ctggagtc	2.62	2.3965
ctggagtg	-0.5135	2.8301
ctggagtt	1.9037	3.5119
ctggataa	0.9472	1.7133
ctggatac	1.6334	1.4581
ctggatag	-0.2008	1.6778
ctggatat	1.3834	2.8364
ctggatca	1.4161	4.1995
ctggatcc	2.3155	0.844
ctggatcg	1.5098	0.7689
ctggatct	3.6567	3.5687	ctggatct	ctggatct
ctggatga	2.2674	2.4792
ctggatgc	3.8253	1.5553
ctggatgg	-1.3571	-1.2225
ctggatgt	2.3368	3.7785
ctggatta	-0.2027	3.5978
ctggattc	0.9357	2.616
ctggattg	0.3744	3.6515
ctggattt	1.8747	2.7986
ctggcaaa	1.1863	-0.6753
ctggcaac	3.2387	1.0006
ctggcaag	3.267	0.0765
ctggcaat	1.1454	0.8053
ctggcaca	0.2395	1.3154
ctggcacc	2.6113	-0.2927
ctggcacg	3.6609	1.9941
ctggcact	-0.0299	1.2363
ctggcaga	2.148	2.3351
ctggcagc	8.547	1.9184
ctggcagg	2.7576	1.0597
ctggcagt	4.9661	3.9288	ctggcagt	ctggcagt
ctggcata	-1.3189	-0.4196
ctggcatc	0.9998	0.844
ctggcatg	-2.0195	0.0341
ctggcatt	-1.5979	1.6684
ctggccaa	-0.5362	-1.4478
ctggccac	1.0951	-0.7238
ctggccag	0.1413	-0.2395
ctggccat	0.9471	0.4132
ctggccca	3.3094	0.5797
ctggcccc	2.5	-2.1236
ctggcccg	3.4804	-3.529	ctggcccg
ctggccct	2.4059	-0.3884
ctggccga	3.7347	0.1165
ctggccgc	3.7347	-1.68
ctggccgg	4.1205	0.03
ctggccgt	3.8007	0.9754
ctggccta	-0.4004	-0.5356
ctggcctc	-3.8422	-1.7727
ctggcctg	4.4624	1.3735
ctggcctt	-0.4097	1.4299
ctggcgaa	2.5843	2.1149
ctggcgac	3.2604	0.4027
ctggcgag	4.205	2.6698	ctggcgag	ctggcgag
ctggcgat	1.6654	2.0388
ctggcgca	3.2373	0.1373
ctggcgcc	4.3079	-3.0105	ctggcgcc
ctggcgcg	1.2657	-1.2407
ctggcgct	3.3509	-0.5867
ctggcgga	4.8765	3.0308	ctggcgga	ctggcgga
ctggcggc	9.739	2.5097
ctggcggg	3.4362	-0.4628
ctggcggt	4.9764	2.8588	ctggcggt	ctggcggt
ctggcgta	2.6613	2.5538
ctggcgtc	1.7916	0.7141
ctggcgtg	0.2215	3.3405
ctggcgtt	2.3343	-0.5957
ctggctaa	-1.0318	-0.595
ctggctac	1.3144	0.6285
ctggctag	-0.7828	-0.134
ctggctat	0.6905	0.3356
ctggctca	-2.2432	1.6137
ctggctcc	1.7671	0.1225
ctggctcg	1.4406	0.686
ctggctct	3.7165	1.34
ctggctga	4.3378	4.9061	ctggctga	ctggctga
ctggctgc	5.295	3.2451	ctggctgc	ctggctgc
ctggctgg	-2.6804	1.1424
ctggctgt	2.9889	1.5646
ctggctta	-1.1597	-0.3908
ctggcttc	0.4142	0.8309
ctggcttg	-2.5487	-2.0092
ctggcttt	-0.1929	0.2388
ctgggaaa	1.0906	1.7755
ctgggaac	2.2114	0.9576
ctgggaag	2.0138	0.2945
ctgggaat	-3.3682	1.1079
ctgggaca	-0.304	0.7785
ctgggacc	2.4958	1.7915
ctgggacg	0.1692	-0.4562
ctgggact	-1.1921	2.138
ctgggaga	3.3717	2.6494	ctgggaga	ctgggaga
ctgggagc	6.3607	3.9676	ctgggagc	ctgggagc
ctgggagg	0.1891	0.0324
ctgggagt	-2.9359	1.6992
ctgggata	-2.4597	1.9021
ctgggatc	-2.586	2.5283
ctgggatg	-1.8696	0.6588
ctgggatt	-5.199	2.2871
ctgggcaa	-1.2333	-2.2076
ctgggcac	-2.3658	-1.3333
ctgggcag	2.323	0.2753
ctgggcat	-0.1147	0.1762
ctgggcca	2.313	-1.3252
ctgggccc	1.7401	-1.4399
ctgggccg	2.0126	-2.9538
ctgggcct	-1.8155	-2.1782
ctgggcga	0.6367	-1.4788
ctgggcgc	-1.8904	-1.8463
ctgggcgg	1.7615	-1.6122
ctgggcgt	0.4245	-0.8463
ctgggcta	-2.433	-1.4916
ctgggctc	-3.0995	0.9462
ctgggctg	1.6839	0.8981
ctgggctt	-4.8197	-0.2012
ctggggaa	0.7439	0.4659
ctggggac	3.3886	1.979
ctggggag	0.5842	0.8418
ctggggat	0.3302	0.3029
ctggggca	-0.1974	-3.1111
ctggggcc	4.8998	-1.1539
ctggggcg	1.1257	-3.6641
ctggggct	-0.1912	-1.9025
ctggggga	1.4971	0.3734
ctgggggc	2.5496	-2.1542
ctgggggg	1.265	-1.1471
ctgggggt	-0.4155	-1.0377
ctggggta	-0.5392	-0.2417
ctggggtc	-2.288	-0.3203
ctggggtg	0.434	0.1062
ctggggtt	-3.6007	-0.7333
ctgggtaa	-1.5358	-1.3458
ctgggtac	0.4677	0.9297
ctgggtag	-0.1761	-0.1593
ctgggtat	-1.7482	-1.1084
ctgggtca	0.7671	0.5326
ctgggtcc	1.9449	0.4202
ctgggtcg	1.6937	-1.2939
ctgggtct	-1.1841	-0.7798
ctgggtga	1.8316	0.9763
ctgggtgc	0.0974	-0.0227
ctgggtgg	0.5477	1.1567
ctgggtgt	0.5675	0.8372
ctgggtta	-3.4776	-1.4025
ctgggttc	-2.7227	0.8319
ctgggttg	-1.2435	0.1907
ctgggttt	-3.5956	0.5616
ctggtaaa	0.583	1.4542
ctggtaac	-0.7401	-0.5232
ctggtaag	-1.8218	-1.4312
ctggtaat	-1.7275	-0.1253
ctggtaca	-0.9727	-0.8536
ctggtacc	2.507	0.7674
ctggtacg	1.9003	0.3287
ctggtact	-1.346	-0.5022
ctggtaga	-0.0981	1.1175
ctggtagc	3.6647	1.9916
ctggtagg	1.3774	0.3775
ctggtagt	1.0015	0.9929
ctggtata	-1.974	-0.3108
ctggtatc	-2.8295	-0.1506
ctggtatg	-1.2732	0.6139
ctggtatt	-5.7999	-1.0794
ctggtcaa	0.4857	0.5343
ctggtcac	-0.3233	2.634
ctggtcag	0.6846	2.1444
ctggtcat	-1.3815	0.8586
ctggtcca	4.3975	0.8682
ctggtccc	1.3605	-0.481
ctggtccg	4.6478	0.5897
ctggtcct	-0.4134	0.1765
ctggtcga	1.7185	0.0762
ctggtcgc	0.1029	0.9633
ctggtcgg	4.7643	2.6188
ctggtcgt	-1.5774	1.0118
ctggtcta	-4.0563	-0.5722
ctggtctc	-4.1568	2.3482
ctggtctg	-0.9578	2.1734
ctggtctt	-2.969	1.924
ctggtgaa	3.9731	3.0477	ctggtgaa	ctggtgaa
ctggtgac	2.0862	2.1557
ctggtgag	1.9905	2.3664
ctggtgat	0.1692	0.5075
ctggtgca	1.9864	-0.4986
ctggtgcc	1.2712	-2.1091
ctggtgcg	2.1911	-0.545
ctggtgct	2.9717	-1.0752
ctggtgga	3.7682	4.8095	ctggtgga	ctggtgga
ctggtggc	2.7247	1.2383
ctggtggg	1.6136	0.3051
ctggtggt	0.9471	0.5331
ctggtgta	2.9086	3.0249	ctggtgta	ctggtgta
ctggtgtc	-1.1547	0.7908
ctggtgtg	1.1758	2.2347
ctggtgtt	-1.4767	1.0372
ctggttaa	-0.209	0.3205
ctggttac	-0.472	1.439
ctggttag	-0.573	0.088
ctggttat	-0.472	-0.4524
ctggttca	-0.2449	2.2093
ctggttcc	2.79	0.9965
ctggttcg	0.5221	0.6812
ctggttct	-1.397	-2.6528
ctggttga	0.6488	1.1463
ctggttgc	1.1256	2.3911
ctggttgg	0.8205	2.3103
ctggttgt	0.9364	1.7624
ctggttta	-2.8427	-1.3975
ctggtttc	-2.5537	0.7891
ctggtttg	-1.6132	0.1003
ctggtttt	-3.1886	-0.6617
ctgtaaaa	-0.4326	-0.1709
ctgtaaac	-4.3526	-0.0873
ctgtaaag	0.0696	0.1283
ctgtaaat	-2.5127	-0.473
ctgtaaca	-3.0452	-0.9881
ctgtaacc	-5.9815	-0.6458
ctgtaacg	-1.2431	-1.3082
ctgtaact	-0.8241	-0.3771
ctgtaaga	-2.6323	-1.2407
ctgtaagc	-3.8335	1.5894
ctgtaagg	-1.3591	-1.1907
ctgtaagt	-1.21	1.2981
ctgtaata	-6.5458	-1.4708
ctgtaatc	-6.1918	-0.0613
ctgtaatg	-6.5358	-2.1238
ctgtaatt	-6.7069	-2.4403
ctgtacaa	-0.8582	0.451
ctgtacac	1.4124	1.1309
ctgtacag	0.2286	0.4653
ctgtacat	-1.5625	-1.1145
ctgtacca	2.3841	1.9388
ctgtaccc	1.1285	1.6079
ctgtaccg	-0.0301	-1.6966
ctgtacct	2.1188	0.5574
ctgtacga	1.9229	0.7783
ctgtacgc	1.1313	-0.0223
ctgtacgg	1.9229	-0.6312
ctgtacgt	1.4898	1.3031
ctgtacta	-1.0104	-0.8772
ctgtactc	-4.3182	-1.4012
ctgtactg	2.3155	1.1746
ctgtactt	-0.9707	-0.3113
ctgtagaa	3.3886	4.3912	ctgtagaa	ctgtagaa
ctgtagac	1.0299	0.9325
ctgtagag	1.7212	2.4246
ctgtagat	1.3871	3.4747
ctgtagca	1.2543	0.0341
ctgtagcc	0.9888	1.8167
ctgtagcg	3.0707	0.9621
ctgtagct	2.2329	1.1781
ctgtagga	4.4004	3.0106	ctgtagga	ctgtagga
ctgtaggc	2.747	0.3659
ctgtaggg	0.3324	-0.0103
ctgtaggt	0.8819	1.4164
ctgtagta	-0.9162	0.9255
ctgtagtc	-5.1795	-1.7989
ctgtagtg	-1.1642	0.9325
ctgtagtt	-1.2092	-0.8745
ctgtataa	-2.6669	-0.822
ctgtatac	-0.2385	1.3124
ctgtatag	-0.7289	-0.3121
ctgtatat	-3.2192	-1.0582
ctgtatca	-1.0725	0.3131
ctgtatcc	-1.5983	-1.0054
ctgtatcg	-0.2974	0.7338
ctgtatct	-1.1836	0.5779
ctgtatga	-1.974	-1.1053
ctgtatgc	-1.6909	-1.5691
ctgtatgg	0.0017	1.8898
ctgtatgt	-1.7848	0.6543
ctgtatta	-3.0188	-0.4022
ctgtattc	-5.7738	-1.74
ctgtattg	-1.8296	-0.1764
ctgtattt	-4.3861	-1.6799
ctgtcaaa	-1.5177	-0.4419
ctgtcaac	1.2367	1.8592
ctgtcaag	0.1596	0.3615
ctgtcaat	-0.4523	0.8532
ctgtcaca	-1.2013	0.5593
ctgtcacc	0.512	2.7425
ctgtcacg	-0.8159	1.3554
ctgtcact	0.3749	2.7391
ctgtcaga	-0.245	0.2829
ctgtcagc	1.0812	1.8588
ctgtcagg	-0.4405	-2.0598
ctgtcagt	-0.0981	1.2399
ctgtcata	-1.9218	-0.5652
ctgtcatc	-4.7488	-0.0621
ctgtcatg	-1.6358	0.18
ctgtcatt	-0.8446	2.1762
ctgtccaa	0.0226	-0.2869
ctgtccac	0.4261	0.4433
ctgtccag	2.1821	0.1596
ctgtccat	0.7423	1.421
ctgtccca	3.5149	1.2406
ctgtcccc	0.8442	-1.0115
ctgtcccg	3.3049	-0.6728
ctgtccct	2.6984	1.9761
ctgtccga	1.5297	-0.2764
ctgtccgc	2.5203	0.1077
ctgtccgg	4.8626	0.4402
ctgtccgt	4.0201	2.3603
ctgtccta	1.2769	0.9943
ctgtcctc	1.6747	2.1885
ctgtcctg	4.0883	2.6572	ctgtcctg	ctgtcctg
ctgtcctt	1.3386	2.139
ctgtcgaa	1.996	-0.4294
ctgtcgac	3.4482	3.3418	ctgtcgac	ctgtcgac
ctgtcgag	2.9081	1.5817
ctgtcgat	2.0964	3.6822
ctgtcgca	1.3628	0.0618
ctgtcgcc	1.2499	-0.0194
ctgtcgcg	3.4117	0.3488
ctgtcgct	1.6319	0.0116
ctgtcgga	3.0707	-0.4256
ctgtcggc	6.5232	3.1684	ctgtcggc	ctgtcggc
ctgtcggg	2.5027	-1.6878
ctgtcggt	3.8531	2.9955	ctgtcggt	ctgtcggt
ctgtcgta	0.4452	1.0175
ctgtcgtc	1.9878	0.5107
ctgtcgtg	2.1633	1.9419
ctgtcgtt	0.6965	0.6037
ctgtctaa	-2.2188	-2.3194
ctgtctac	0.8984	1.4636
ctgtctag	-0.2708	0.5721
ctgtctat	-1.4543	0.18
ctgtctca	-1.957	0.5326
ctgtctcc	0.485	0.9277
ctgtctcg	-0.6224	-1.158
ctgtctct	-1.6379	-1.2687
ctgtctga	0.6845	0.4958
ctgtctgc	3.7117	2.9148	ctgtctgc	ctgtctgc
ctgtctgg	-0.4966	0.1718
ctgtctgt	0.3328	1.1818
ctgtctta	-2.5087	-0.9841
ctgtcttc	-0.9839	0.9573
ctgtcttg	-2.1292	0.0557
ctgtcttt	-0.7371	0.4586
ctgtgaaa	0.1438	1.55
ctgtgaac	2.4125	2.7321
ctgtgaag	2.1207	1.6202
ctgtgaat	-1.9872	0.9687
ctgtgaca	-0.382	0.3431
ctgtgacc	2.5868	4.3464
ctgtgacg	1.7059	0.96
ctgtgact	-1.6065	-0.5778
ctgtgaga	2.1865	1.6851
ctgtgagc	2.0366	0.8294
ctgtgagg	0.8865	0.2388
ctgtgagt	-0.8054	-1.2432
ctgtgata	-1.6001	-0.0072
ctgtgatc	-3.6353	1.3833
ctgtgatg	-0.317	0.0936
ctgtgatt	-3.9188	-0.4006
ctgtgcaa	3.8099	2.3153
ctgtgcac	3.2957	3.0201	ctgtgcac	ctgtgcac
ctgtgcag	2.4194	2.2625
ctgtgcat	0.0832	-0.0623
ctgtgcca	3.4807	2.1243
ctgtgccc	4.3475	1.2502
ctgtgccg	5.2937	0.0605
ctgtgcct	2.8628	1.6616
ctgtgcga	5.8817	3.2615	ctgtgcga	ctgtgcga
ctgtgcgc	3.0382	0.4138
ctgtgcgg	7.7784	2.8042	ctgtgcgg	ctgtgcgg
ctgtgcgt	1.5497	-0.3908
ctgtgcta	2.4319	1.472
ctgtgctc	0.2293	0.9464
ctgtgctg	5.0063	3.1287	ctgtgctg	ctgtgctg
ctgtgctt	1.8711	1.0814
ctgtggaa	2.2612	3.2668
ctgtggac	6.8925	3.8254	ctgtggac	ctgtggac
ctgtggag	6.4061	4.9924	ctgtggag	ctgtggag
ctgtggat	1.1098	1.796
ctgtggca	3.3496	2.8126	ctgtggca	ctgtggca
ctgtggcc	4.6598	2.6696	ctgtggcc	ctgtggcc
ctgtggcg	3.4362	0.2203
ctgtggct	-0.2976	0.4506
ctgtggga	-1.7032	-0.5998
ctgtgggc	3.9301	0.8173
ctgtgggg	3.2952	0.2996
ctgtgggt	1.1399	0.8134
ctgtggta	-0.494	-0.2969
ctgtggtc	2.0366	1.6128
ctgtggtg	2.8201	1.6881
ctgtggtt	0.2147	-0.4562
ctgtgtaa	-0.4372	0.5067
ctgtgtac	0.5008	0.9927
ctgtgtag	2.1652	3.9727
ctgtgtat	-1.1395	-0.6992
ctgtgtca	0.4967	2.1726
ctgtgtcc	1.9647	2.5983
ctgtgtcg	1.5989	1.6079
ctgtgtct	-1.4172	-2.176
ctgtgtga	0.434	1.6241
ctgtgtgc	1.3403	1.3806
ctgtgtgg	2.6264	1.2874
ctgtgtgt	-1.9305	1.3148
ctgtgtta	-2.1913	0.7204
ctgtgttc	-0.7967	0.3507
ctgtgttg	0.8913	3.4815
ctgtgttt	-3.1506	-0.7238
ctgttaaa	-3.2396	-1.096
ctgttaac	-1.9101	-1.158
ctgttaag	-2.098	-0.4938
ctgttaat	-4.0856	-2.146
ctgttaca	-1.0649	-0.1413
ctgttacc	-0.7825	1.4061
ctgttacg	-0.0068	-0.3449
ctgttact	-0.7238	0.4806
ctgttaga	-1.7354	-1.0368
ctgttagc	0.9111	1.6248
ctgttagg	0.1917	-0.3364
ctgttagt	-1.302	0.6291
ctgttata	-2.4378	-0.384
ctgttatc	-4.635	0.5601
ctgttatg	-3.5536	-1.6243
ctgttatt	-3.0992	-1.4968
ctgttcaa	-0.7922	-1.4755
ctgttcac	0.2804	1.3407
ctgttcag	0.4692	1.3154
ctgttcat	-2.0206	-0.7758
ctgttcca	4.1621	3.0725	ctgttcca	ctgttcca
ctgttccc	4.4389	2.5273
ctgttccg	5.0334	1.29
ctgttcct	3.7145	1.1405
ctgttcga	1.8839	0.8116
ctgttcgc	5.1099	2.6269	ctgttcgc	ctgttcgc
ctgttcgg	3.599	0.6037
ctgttcgt	2.0436	1.3338
ctgttcta	1.3044	1.6089
ctgttctc	-1.0187	0.7099
ctgttctg	2.3456	2.8167
ctgttctt	-1.6136	0.8065
ctgttgaa	1.1927	2.2292
ctgttgac	0.4261	1.9941
ctgttgag	0.9471	1.779
ctgttgat	-0.7833	1.2064
ctgttgca	2.9284	1.8264
ctgttgcc	0.8995	0.9665
ctgttgcg	2.0415	0.7679
ctgttgct	1.5854	0.1643
ctgttgga	4.1196	2.2907
ctgttggc	1.0013	2.3251
ctgttggg	3.0831	2.3729
ctgttggt	2.363	3.9302
ctgttgta	-0.1209	0.8241
ctgttgtc	-0.1603	0.1436
ctgttgtg	1.7212	2.3352
ctgttgtt	-0.3691	1.5654
ctgtttaa	-2.6185	-1.884
ctgtttac	-1.179	-0.9571
ctgtttag	-1.9546	0.1724
ctgtttat	-4.0646	-2.0949
ctgtttca	-1.7423	-1.0477
ctgtttcc	-0.7692	-0.3825
ctgtttcg	0.8457	-0.362
ctgtttct	-2.891	-2.4964
ctgtttga	1.4185	1.7184
ctgtttgc	0.4857	-0.2308
ctgtttgg	1.6469	1.4808
ctgtttgt	-2.2815	-1.1197
ctgtttta	-3.4933	-2.058
ctgttttc	-1.2819	-0.0658
ctgttttg	-1.2988	1.0722
ctgttttt	-5.4441	-1.9024
cttaaaaa	-3.5162	-0.8575
cttaaaac	-0.8035	1.2045
cttaaaag	1.1124	3.2818
cttaaaat	-3.4349	-1.7546
cttaaaca	-0.3788	0.1119
cttaaacc	1.3742	0.6443
cttaaacg	0.2176	0.2642
cttaaact	-4.3098	-1.535
cttaaaga	-0.4104	0.3346
cttaaagc	0.9286	0.508
cttaaagg	-0.7616	1.0252
cttaaagt	-3.1288	-0.6866
cttaaata	-2.158	-0.6407
cttaaatc	1.3736	1.5397
cttaaatg	-2.683	-0.5055
cttaaatt	-3.2318	-0.9926
cttaacaa	-0.8071	-0.6661
cttaacac	-1.0476	-1.1735
cttaacag	0.6558	-0.3734
cttaacat	-2.3093	-0.8245
cttaacca	0.3658	0.4041
cttaaccc	0.1502	-0.3121
cttaaccg	2.2153	0.1937
cttaacct	-1.3591	-1.6654
cttaacga	2.0346	0.9185
cttaacgc	-1.1779	-1.7458
cttaacgg	2.5571	1.0716
cttaacgt	-0.5945	-0.8773
cttaacta	-1.7237	-1.0154
cttaactc	0.6169	-0.1454
cttaactg	-0.154	0.6037
cttaactt	-0.6163	0.7309
cttaagaa	1.2771	3.5612
cttaagac	0.8548	1.0257
cttaagag	1.0877	0.5593
cttaagat	0.5031	1.4523
cttaagca	-1.2092	-0.2973
cttaagcc	-0.2999	0.9241
cttaagcg	0.6701	1.0716
cttaagct	-0.5511	-0.5704
cttaagga	0.3531	1.3728
cttaaggc	0.3767	0.2205
cttaaggg	-0.8204	-0.7039
cttaaggt	-2.2355	-1.4756
cttaagta	-2.3456	-0.8511
cttaagtc	-0.7471	-0.1506
cttaagtg	-2.2292	1.2442
cttaagtt	-1.8022	0.153
cttaataa	-2.1466	-1.1809
cttaatac	-1.3859	-0.2764
cttaatag	-1.6973	0.7014
cttaatat	-2.9777	-1.0054
cttaatca	-0.7412	0.7884
cttaatcc	-0.2358	1.439
cttaatcg	-0.237	1.4616
cttaatct	-0.9993	0.6836
cttaatga	-2.4611	-1.7327
cttaatgc	-1.931	-1.3598
cttaatgg	-2.5973	-1.6745
cttaatgt	-3.0706	0.1642
cttaatta	-4.0641	-2.1126
cttaattc	-0.2672	-0.1593
cttaattg	-0.6962	0.8629
cttaattt	-3.3826	0.4509
cttacaaa	-1.8377	-1.2017
cttacaac	0.484	1.449
cttacaag	1.1396	1.59
cttacaat	-3.2689	-2.389
cttacaca	-0.9966	-0.8536
cttacacc	0.644	-0.4912
cttacacg	-0.5189	-1.2713
cttacact	-2.7623	-2.9077	cttacact		cttacact
cttacaga	0.5985	0.5198
cttacagc	2.7342	-0.3663
cttacagg	-1.5375	-1.6712
cttacagt	-0.6718	-1.0281
cttacata	-3.1402	-2.3191
cttacatc	0.3106	1.397
cttacatg	-1.3379	0.0375
cttacatt	-1.8349	-0.8818
cttaccaa	-0.3848	1.3224
cttaccac	-2.4556	-1.807
cttaccag	-0.1956	-0.8245
cttaccat	-1.6683	-0.6064
cttaccca	0.9111	-0.1365
cttacccc	1.1296	0.2239
cttacccg	1.9667	-1.0221
cttaccct	-1.6282	-1.71
cttaccga	-0.3113	-1.4541
cttaccgc	1.8456	-0.4732
cttaccgg	1.7717	0.1276
cttaccgt	-1.4752	-1.1649
cttaccta	-2.5774	-1.9343
cttacctc	-2.6185	-0.6099
cttacctg	3.1362	2.1571
cttacctt	-1.7017	-0.0378
cttacgaa	-0.5945	-1.6745
cttacgac	0.452	0.3018
cttacgag	0.7356	0.4123
cttacgat	-1.917	-1.2827
cttacgca	-0.8376	-1.9244
cttacgcc	-2.0634	-1.1843
cttacgcg	0.9409	-1.6472
cttacgct	-0.9148	-1.6098
cttacgga	0.1777	-1.0479
cttacggc	2.2153	-0.1846
cttacggg	-0.2614	-1.9244
cttacggt	-1.8503	-2.0619
cttacgta	-1.9718	-2.0619
cttacgtc	-0.2235	-0.3149
cttacgtg	-1.5958	0.31
cttacgtt	-0.8208	-0.1086
cttactaa	-2.7405	-1.8501
cttactac	-0.8931	0.2556
cttactag	-1.9317	-0.6996
cttactat	-3.1568	-1.3872
cttactca	-0.1494	-0.1631
cttactcc	2.5743	1.1749
cttactcg	1.0143	0.4758
cttactct	-1.9852	-1.7573
cttactga	-0.4826	-0.3553
cttactgc	-0.7829	0.9297
cttactgg	1.1296	-1.6398
cttactgt	-1.8956	-0.7043
cttactta	-2.022	-1.2407
cttacttc	0.0477	-0.3837
cttacttg	-1.5983	-1.0302
cttacttt	-2.8033	-0.6941
cttagaaa	-0.3407	1.2575
cttagaac	-0.4818	-1.0888
cttagaag	2.519	2.5056
cttagaat	-2.9464	-1.7989
cttagaca	-1.3367	-1.6413
cttagacc	1.808	1.8466
cttagacg	1.996	1.3363
cttagact	-1.8943	-2.1424
cttagaga	0.5735	2.1327
cttagagc	1.6334	0.2732
cttagagg	-1.4935	-1.1941
cttagagt	-2.0614	-0.6527
cttagata	-2.8793	-1.5192
cttagatc	0.5537	0.89
cttagatg	-2.2243	-1.9728
cttagatt	-1.5401	0.1654
cttagcaa	-0.4094	-0.8927
cttagcac	1.4752	0.5695
cttagcag	2.3175	0.5469
cttagcat	0.1457	0.0445
cttagcca	-0.8353	-0.061
cttagccc	0.6629	-0.2331
cttagccg	3.0764	1.0648
cttagcct	-3.3383	1.632
cttagcga	0.3078	0.2848
cttagcgc	4.3999	1.1806
cttagcgg	3.263	0.988
cttagcgt	1.3052	1.7071
cttagcta	-0.8505	-0.2333
cttagctc	-1.2142	-1.5294
cttagctg	0.4005	0.7644
cttagctt	-1.9693	-1.3975
cttaggaa	-2.5036	-2.0761
cttaggac	2.1981	1.3463
cttaggag	1.5307	1.9167
cttaggat	0.009	0.7937
cttaggca	-2.5914	-2.2808
cttaggcc	0.0595	-0.4764
cttaggcg	-0.98	-1.8865
cttaggct	-0.9037	-0.363
cttaggga	-4.6541	-2.5967
cttagggc	0.1814	-1.1655
cttagggg	-0.2999	-0.4938
cttagggt	-0.7922	0.779
cttaggta	-3.2728	-2.5806
cttaggtc	-0.1514	0.231
cttaggtg	-1.9793	-1.0281
cttaggtt	-0.9162	0.4202
cttagtaa	-0.2217	-0.545
cttagtac	-1.1595	-1.0907
cttagtag	-2.7229	-1.3699
cttagtat	-1.7275	-1.0329
cttagtca	0.1629	0.6809
cttagtcc	2.3856	1.5397
cttagtcg	0.7971	-0.0193
cttagtct	-0.3295	0.895
cttagtga	-0.6473	-0.0305
cttagtgc	-0.3238	0.2648
cttagtgg	-1.2937	-1.7741
cttagtgt	-1.1572	0.3058
cttagtta	-1.9517	-2.0398
cttagttc	0.395	0.2239
cttagttg	-0.0432	0.0475
cttagttt	-2.6866	-0.7677
cttataaa	-2.1976	-1.061
cttataac	-1.5443	-1.737
cttataag	-1.9566	0.0457
cttataat	-3.7314	-2.4995
cttataca	-1.6683	-1.2663
cttatacc	-0.5959	0.988
cttatacg	-0.714	-0.0805
cttatact	-1.8169	-2.1015
cttataga	-2.1046	0.1047
cttatagc	-1.7995	-1.0146
cttatagg	-1.5228	-0.6149
cttatagt	-3.3278	-2.115
cttatata	-2.9308	-1.303
cttatatc	-1.5393	-0.7906
cttatatg	-3.6693	-2.6243	cttatatg		cttatatg
cttatatt	-4.9611	-2.9672	cttatatt		cttatatt
cttatcaa	-0.3424	-0.2331
cttatcac	-1.4767	-0.7044
cttatcag	0.4911	1.4987
cttatcat	-1.6799	-0.9052
cttatcca	0.7796	-0.1881
cttatccc	-1.3881	-1.4643
cttatccg	1.5847	0.5762
cttatcct	-0.9486	-1.4983
cttatcga	0.4739	-0.361
cttatcgc	-1.0623	-0.4904
cttatcgg	3.0567	1.8736
cttatcgt	0.1805	-0.58
cttatcta	-1.8022	-0.9939
cttatctc	-2.2748	-1.0302
cttatctg	-1.1716	1.7936
cttatctt	-2.9641	-1.0981
cttatgaa	-1.9299	-1.6683
cttatgac	-0.712	0.3886
cttatgag	-2.5364	-1.1173
cttatgat	-1.8022	-1.1326
cttatgca	-1.8894	-3.1967
cttatgcc	-2.4976	-0.1312
cttatgcg	-1.0978	-0.292
cttatgct	-2.7095	-3.6142	cttatgct		cttatgct
cttatgga	-2.1704	-1.8706
cttatggc	-2.6697	-2.115
cttatggg	0.1382	1.7615
cttatggt	-2.5524	-1.3589
cttatgta	-4.5117	-3.3287	cttatgta		cttatgta
cttatgtc	-2.8966	-1.5192
cttatgtg	-2.184	-0.274
cttatgtt	-4.5418	-1.7984
cttattaa	-1.825	-0.1097
cttattac	-2.1216	-0.913
cttattag	-3.1515	-1.0479
cttattat	-3.8934	-1.6511
cttattca	-1.2522	-1.7705
cttattcc	-0.573	-0.9332
cttattcg	0.3341	0.6329
cttattct	-1.7131	-0.5054
cttattga	-2.3992	-0.3328
cttattgc	-1.4501	0.034
cttattgg	-0.362	1.7936
cttattgt	-3.0546	-0.8362
cttattta	-4.6882	-2.7014	cttattta		cttattta
[truncated: 33,536 more rows]

## Sheet: ESR set
GATGAA
CTCATC
ACCATC
AATGAA
CTCTTC
CTGGAG
TTTGAA
GCCATC
GTCATC								Reference:
CCCATC								Mol Cell. 2006 Jun 23;22(6):769-81. Links Comment in: Mol Cell. 2006 Jul 21;23(2):150-1. Comparative analysis identifies exonic splicing regulatory sequences--The complex definition of enhancers and silencers. Goren A, Ram O, Amit M, Keren H, Lev-Maor G, Vig I, Pupko T, Ast G. Department of Human Molecular Genetics and Biochemistry, Sackler Faculty of Medicine, Tel Aviv University, Tel Aviv 69978…
GCCAAG
TTTGAT
TATGAA
ACCAAG
TTTGGA
GGCTGC
CCCAAC
ATTGAA
TTTGCT
GGCTGG
GGCTAC
ACCAAC
TGTGAA
CTCACC
CCCAGC
AATGGA
GATGCT
GCTGTG
GATGAC
GCCATG
GAAGAA
GTCACC
GCAGAA
TGTGAC
GCCAAC
GAAGAT
CAAGAA
GCCACC
AAAGGA
TTTGAG
CTCAAC
CCCAAG
ATCATC
GCCTTC
TCAGAA
GGAGAA
ATAGAA
ATTGGA
TTCTTC
ACCTTC
CATGAA
AGTGAA
TCCATC
CGCTGG
AGTGAC
ATTGCT
GTAGAA
GCAGAT
ACCATG
TTTGCC
GACAGC
GATGCC
GGCATC
GACTGG
TCCATG
TATGGA
GATGTT
TCCTTC
TTTGAC
AAAGAA
ACCTAC
TTCATC
AATGAC
GGGAAG
CCCATG
GATGCA
GATGGA
CCCTGC
TTTGTG
TCAGAT
GACATG
CAAGGA
TATGAC
AATGCA
ATTGAT
GACATC
GAAGTT
TTTGGG
GAGAAG
GTTGGA
TGTGAG
GCCAGC
GTCAGC
CCCTTC
TTTGCA
AATGCT
TATGCA
CTTGGA
TTTGTT
TGTGCC
TTCCAG
GCTGCT
TTTGGT
ATCACC
ACTGGA
GATGGC
AGCATC
AACAGC
GTTGGT
GTCTTC
CCTGGA
TTGGAT
AATGCC
GAAGTA
GACAAG
AACATC
TACATC
ATCAAC
TTCTCC
TGTGCT
TGTGTG
ATTGGT
GCTGCC
GGCTGT
CTAGAA
CAAGTA
GATGGT
TTCCTG
ACCAGC
GACAAC
GCCTGC
TTAGAA
CAAGAT
GACTTC
AGAGAA
TATGAG
ATTTTA
TTCATG
AGTGGT
AACAAC
CTCATG
TCTGCA
ACAGAA
TACCTG
GAAGGA
TCTGTG
AAAGTA
ATCATG
CTTCCT
TACTGC
TTAAAT
GAAAAT
GACCAG
CGCCTG
GATGTC
TCCTGG
ATATTT
TTCAAC
GGTGGA
AACTTC
GCAGAG
GCTGTT
AAGAAG
GACCTG
GGTGCT
CACATG
CCAGAA
CCCTAC
GGAGGA
AGTGCC
GCCTGG
CAAGTT
AACTGG
AACATG
TCTGGA
GTCATG
TTCCGG
TTCTGG
TTCTGC
GCTGGT
TTTGTA
ATCTTC
AAAGAT
TACATG
TGTGGC
GCGGCG
TGTGCA
AACCTC
AAAGCA
ATTGTA
ACTGTG
CATGCA
TACTGG
TACAAC
TCTGTT
TGCTGG
GCCTTG
CACTGG
GACCTC
AATGGT
GTTCTT
TGTGTC
CAAGCA
TCAGGA
ATCAGC
AGTGCT
TTGGCA
GGAAGA
CTTGTT
GTCTAC
CAAAGA
CCAGGA
TCCAAG
GCTGCA
AGAGGA
ATCTGC
TACCAG
CCTGGT
AGCTAC
CCCAAA
TATGGG
CACAAG
ACTGCA
GCCATT
CACAAC
CAAGCT
ACCAAA
TATGTA
TCTGTC
GGAGCA
ATCTAC
TCTGGG
GGTGAA
AGCAAA
ATCCAG
CTAAAT
AAGAAA
CGAGAA
AATGTA
AACCAG
TACTTC
GTTGTT
TTCAAG
AGTGCA
GACTAC
ACTGTA
GGCATG
GTGAAG
CGAGGA
AACCTG
AACTAC
TACAAG
ATCAAG
CCCAGG
GACAGA
CCCAGT
CTCAAG
CGTGGT
AGCAAG
TCTGGT
GTTGCT
CTGAAG
GAAGCA
CTTGCT
GTAGCT
TCCTGT
TGCAAA
TCCAAA
CTAGAT
TTAATT
TACTAC
AGCATG
GCAAGA
CTTGTA
TTGGTT
CGCCAG
GCCAAA
CAAGTG
TACCTC
GCAAAT
CCAAAT
CGGAAG
GGCAAC
GCCAGG
TCCAGG

## Sheet: ISRE-Upstream set
GTTTGT	GTTTGTT, GTTTGTC, GTTTGTG,
TCTCC	TCTCCTT, TCTCCA,
GATTTT	GATTTTA,
TTTTTC	CTTTTTC, ATTTTTC, GTTTTTC, TTTTT, ATTTTT, TTTTCTG, TTTTTCT, TTTTTAT, TTTTTA, TTTTTAA,
TAACC	TAACCA, TAACCC, TTAACCT, TAACCTC, TAACCT,
TTGAAAT	TGAAATG, TGAAATC, GAAATAA, TGAAATA, GAAATC, GAAATA, CTTGAAA,
AAGCCA	AAAGCCA,
AATTG	AATTGGC, AATTGA,
CTGCT	CCTGCTG,							Reference:
TTTATG	TTTTATG, TTTATGC,							PLoS Genet. 2007 May 25;3(5):e85. Epub 2007 Apr 13. Links Discovery and analysis of evolutionarily conserved intronic splicing regulatory elements. Yeo GW, Nostrand EL, Liang TY. Crick-Jacobs Center for Theoretical and Computational Biology, Salk Institute, La Jolla, California, United States of America. geneyeo@salk.edu Knowledge of the functional cis-regulatory elements that regulate constituti…
TTCACA	TCACA, TTTCACA,
TGATAA	TTGATAA, TGATAAA,
ATGTTT	AATGTTT, ATGTTTT, TGTTTGA,
TCCAG	GTTCCAG, CCTCCAG, TCTCCAG, CTTCCAG,
TTTCCAA	TCCAAA, TTCCAA,
TTATTTC	TATTTC, ATTTCCA, ATTATTT, TATTTCT, TATTTCA, ATTTCTG, ATTATT, TATTTCC,
TGTGTT	GTGTTT, TGTGTTC, TTGTGTT,
TCTTG	TCTTGT, CTTGGC, TCTTGTC, TCTTGC, TCTTGTT, TCTTGGC, TCTTGG, TCTTGCA,
TTGTAA	TTGTAAT,
CTTGAC	TTGACTT, TTGACAT, TTGACT,
TTAAAAC	TAAAAC,
CTAAC	CACTAAC, AACTAAC, TCTAACA, CTAACC, GACTAAC, ACTAACC, ACTAAC, TTCTAAC, TACTAAC, CTAACA, ACTAACA, TCTAAC, CTAACCT,
AAAGCT	TAAAGC, TTAAAGC, TAAAGCT,
TCTTC	TCTTCCT, CTCTTC, TCTTCAG, TCTTCT, TCTTCC, TCTTCA,
TGCATG	TGCATGA, CTGCATG, TGCATGC, TGCATGT, TGCATGG, GTGCATG, GCATGTT,
TTCTT	TTTCTTC, CTTCTT, TTCTTGA, GTTCTT, TTTCTTA, TTCTTA, TTCTTAG, TTCTTGC, CTTTCTT, TTCTTCT, TTCTTGG, TTCTTG, TTTCTTG, TTCTTAA, ATTTCTT, TCTTCTT, TTCTTCC, TTCTTGT, TTTTCTT, TTCTTC, ATTCTT,
ACATTT	ACATTTT, AACATTT,
TTTATC	TTTTATC, TTATCAG, TTTATCA, TTATCT, TTATCTT, TTTATCT,
ATTTTCT	TAATTTT, TATTTTC, TGATTTT, TCATTTT,
GCTGACC	TGACCTG, TTGCTGA,
ATAATT	ATAAT, TAATTGT, CATAATT, TAATTTC, AATAATT, ATAATTT, GATAATT,
AACAG	TTAACAG, CCAACAG, CTAACAG, TAACAG, AAAACAG, CAACAG, TCAACAG,
CATTTG	CATTTGC, TGCATTT, CCATTTG, TCATTTG,
TTTCAG	GATTTCA, CTTCA, GTTTCA, CATTTCA, TTTTTCA, CCTTCAG, ATTTCAG, TTCAGAA, TTTTCAG, CTTCAG, GTTTCAG, TTCAG, ATTTTCA, TTCAGA, CTTTCAG, AATTTCA, TTTCAGA,
TTAGCA	TTAGCAT,
TTGCCT	TTGCCAG, TTTGCC, TGCCTTT, TTGCC, TGCCTT, TTGCCTT, TTTGCCA, TTTGCCT,
CAAAT	TCAAAT, CAAATAA, TTCAAAT, CAAATA, CAAATG,
TTTAAC	ATTTAAC, TTTAACT, TTTTAAC, TTTAACC, CTTTAAC,
TAATG	CTAATG, TAATGG, GCTAATG, TAATGAT, TTAATGT, CTAATGG, TCTAATG, TAATGAC, TTAATGC, ATTAATG, CTTAATG, TAATGAA,
AGAAAT	AAGAAAT, TAGAAAT, GAGAAA, AGAAATG, CAGAAAT, AGAAATT,
TTTTGAT	TTGATG, TTTGATG, TTTGATA,
TAACT	TTAACTG, CTAACT, TTAACTC, TTAACT, TAACTG, TCTAACT, CTTAACT, TAACTT, TTAACTT, TAACTC, ATTAACT, TAACTCT, TAACTTG, CTAACTG,
TAAAAT	TAAAATT, TTTAAAA, TAAAATA, TTAAAAT, AAAATAA, TAAAATG,
AATTACA	AATTAC,
TTCAAAA	ATTCAAA,
TTTATA	TTTTATA, TTATAAT, TTTATAA, TTATAA,
CTTGTC	CTTGTCA, TTGTCAT, CTTGT,
TTTACAG	TTTACA, ATTTACA, TTTTACA,
TGGATTT	TGGATT, TTTGGAT,
TTGCATT	GCATTTT, GCATTT,
TTAAG	ATTAAGC, TTTTAAG, TAAGC, TTAAGCA, TTAAGAA, ATTAAG,
TTGGT	TTTTGG, TTTTGGA,
CATAAA	TCATAAA,
TGATTA	TTGATTA, CTGATTA,
GCTTTGC	AGCTTTG, AGCTTT, CTTTGCT,
ATTAG	AATTAGT, CATTA, AATTAGA, TCATTAG, TTATTAG,
TTTTAAA	CATTTTA, TATTTTA, TTAAATC,
ACTAAT	ACTAA, CACTAA, ACTAATT, ACTAATG, TACTAAT, GAACTAA, AACTAA, AAACTAA, TTACTAA, TCACTAA,
CTGACT	CTGACTT, TCTGACT, TGACTTT, CCCTGAC,
ATATTT	AATATT, ATATTTT,
CATTTA	CATTTAA, TCATTTA,
AAATCT	ATCTT, CTAATCT, TAATCT, TAATCTT, AAATCTT, AATCT, AATCTT,
TTTTGGC	TTGGCAA,
TCTTT	ATCTTTG, TCTTTCC, CTCTTTC, CTTCTTT, TTCTTTT, ATTCTTT, CTCTTT, TTCTTTA, TCTTTGG, GTCTT, TCTTTT, TCTTTGA, TCTTTCA, GTTCTTT, TGTCTTT, TCTCTTT, TCTTTA, TTCTTTC, TCTTTTC, TCTTTCT, GTCTTTG, TTTCTTT, TCTTTTT, ATCTTT, TCTTTTG, TCTTTGC, TCTTTC, TCTTTTA, TTCTTT, TCTTTAA, GTCTTT,
TTATTGA	TATTGAT,
TCAGA	CAGAA, CAGAAA, GTCAGA, TCAGAAA, TCAGAA,
TAAGT	TAAGTT, TAAGTTT, TAAGTAT, TAAGTA, TAAGTG,
CTCTG	CTCTGG, CTCTGGG, TGCTCTG, CTCTGCA, CTCTGCT, CCTCTGC, CTCTGC,
TCTGG	TCTGGCA, TCTGGC, TCTGGA, ATCTGGC, TCTGGG, TCTGGAA, TTTCTGG, TTCTGG,
AATTC	TTAATTC, CTAATTC, AATTCAG, TAATTCA, AATTCA, TAATTC,
TTTTCC	TTTCCAT, ATTTTCC, CTTTTCC, TTTTCCT, TTTCCAC, TTTCCTC, GTTTTCC,
TTTTGC	TTTGCTA, CTTTTGC, TTTGCAC, ATTTTGC, TTTTGCT, TTTGCTC,
GTGAG	GTGAGCA, GTGAGGG, GTGAGGA, GTGAGC, GTGAGTA, GTGAGTG, GTGAGTT, GTGAGA, GTGAGG, GTGAGGC,
TCCATTT	TTCCATT, TCCATT, CCATTTC,
AATTTT	AATTTTG, AATTTTC, GAATTTT, AATTTTA,
CTTGATT	TTGATTC, CTTGAT, TGATTC,
GTAAG	GTAAGT, GTAAGGG, GTAAGC, GTAAGTC, GTAAGGC, GTAAGTG, GTAAGG, GTAAGTT, GTAAGA, GTAAGTA, GTAAGGA, GTAAGAA, GTAAGCT,
ATGAAA	ATGAAAA, ATGAA, ATGAAAT,
AGAAAA	TAGAAAA, AGAAAAT,
TGGCTT	TTGGCTT, TGGCTTC, CTGGCT, GGCTT, TGGCTTT, TGGCTTG, CTGGCTT, GGCTTT,
CTCAG	TCTCAG, TCCTCAG, CCTCAG,
TGGAAAT	CTGGAAA, ATGGAAA,
AATTAT	AATTATT, AATTATG, AAATTAT,
AATAAT	GAATAA, GAATAAT, TGAATAA, AAATAAT,
TCCTAG	TTCCTAG, CTCCTAG,
CCACAG	CACAG, TCACAG, CCACA, TCCCACA, CCCACAG, TCCACAG, TCCACA, CTCACAG, CCCACA, TTCCACA, TTCACAG,
TCATTTC	CTCATT, CATTTCT, GTCATTT, TCTCATT, CTCATTT,
AAAGCA	TAAGCA, AAGCA, AAGCAAA, AAAGCAA, AAGCAG, TCAAAGC, AGCAG,
AAATGA	AAATGAC, AAAATGA, GAAATGA, AATGAC, AAATGAA,
TTTATAG	ATTTTAT, TTATAG,
ATTAAAT	AGATTAA, ATATTAA,
CCTGCAG	CCTGCA,
TTACAG	CTTACAG,
AAATGT	AATGTT, AAAATGT, AATGTC, AAATGTT, CTAAATG, TTAAATG, TAAATGT, AATGT, AAATGTC, TAAATG,
TGCAT	TGCATT,
CTTCT	CTTCTG, CTTCTAA, GCTTCT,
TTAGAA	TAGAA, TAGAAA, TAGAATT, TTAGAAA, TTTAGAA, AGAAT, ATTAGAA, AGAATT, AGAATTT,
TGTTTC	GTGTTTC, TGTGTTT, TGTTTCA, ATGTTTC, CTGTTTC, TGTTTCT, ATTGTTT,
TTTAC	TTTTAC, TTTACT, TTTACTT, TTTTACT,
GTTTT	CTGTTTT, TGTTTTT, GTGTTTT, TGTTTTC, GTTTTCT, GTTTTA, GTTTTGT, GTTTTCA, GTTTTGA, TGTTTTA, GTTTTAA, GTTTTAT, GTTTTG, GTTTTC,
CTTCCA	CCTTCCA, CCTTCC, TCTTCCA,
TTCTAG	TTTCTA, TTTCTAG, TCTAA, ATTTCTA, TCTAAT, TTCTAAT, TTTTCTA, TTCTAGA, TTCTA, TTCTAA, CTCTAAT, TTTCTAA, CTTCTAG, TCTAATC,
AAATT	AAATTCT, TAAATT, CAAATTA, TGAAATT, GAAATTA, TCAAATT, CAAATT, TAAATTA, AAATTG, GAAATT, ATAAATT, TAAATTG, AAATTGA, AAATTCA, TTAAATT,
TTAAAC	TAAACT, TTAAACA, TTAAACT, TTTAAAC, TAAAC, TAAACTT, ATTAAAC,
TGAGAA	TGAGA, TGAGAAA,
TTTGTAG	TTGTAG, ATTTTGT,
GTCAGT	GTCAGTG, TTGTCAG,
TAAGA	TAAGAA, TAAGAAA,
AAATCA	TAAATCA, AATCAAT, AAATCAA,
TGTTGA	TGTTGAT,
CTTGC	CTTGCT, GCTTGCT,
TAATTTG	AGTAATT, ATTTGAT, GTAATTT, AATTTGA, ATTTGGC, AATTTGC, ATTTGCT, CCTAATT, AATTTGG, ATTTGG,
CCTCT	TGCCTCT,
TGGTTT	GTGGTTT, TCTGGTT, TTGGTTT, TGTGGTT, TGGTT, TGGTTTG, TGGTTTT,
TGATTTC	GTTGATT, ATTGATT, GATTTCT,
TGTTAA	TTGTTA, TTTGTTA, TGTTA, TGTTAAT, GTTAAA, TTGTTAA, TGTTAAA, TTGTTAG, GTTAAAT,
TGTGTC	TTGTGT, TGTGTCT, TTGTGTC,
TCTCT	CTTCTCT, CTCTCTC, CTCTC, TCTCTTG, TTCTCTG, TCTCTT, CTCTCTG, TCTCTGC, TTCTCT, CTCTCT, TCTCTG, TCTCTC, TCTCTAG, TCTCTGG, TCTCTCC, TCTCTGT, TTCTCTT, TGTCTCT, TTCTCTC, TCTCTGA, TTTCTCT, CCTCTCT, TCTCTTC, TCTCTCT,
TTAACA	TAACATT, CCTTAAC, TAACA, GTTAAC, TTAACAT, TTTAACA, ATTAACA, TATTAAC,
TTTGGT	TGTTTGG, TTTGGTT, TTTTGGT, TTGGTT,
TGTCT	TGTCTC, CTGTCT, TGTCTGC, TGTCTT, TGTCTGT, TGTCTTC, GTGTCT, TGTCTTG, TTGTCTC, TGTCTAA, CTTGTCT, TTGTCTT, TGTCTCC, TCTGTCT, TGTCTG, CTGTCTG, CTGTCTT,
TTCCTT	TTCCTTA, TTTCCTT, TTCCTTG, TATCCTT, TCCTTG, TCCTTTG, TCCTTCC, TCCTTC, TCCTTAA, TTCCTTC, TCCTTAG, TCCTTGA, ATCCTTT, TCCTTT, TCCTT, CTTCCTT, TCCTTA, TGTCCTT, CTTAG, TTCCTTT,
TGAATT	TGAATTC, CTGAATT, GAATTTG, TGAATTA, TTGAATT, TGAATTT, GAATTA, GAATTAA,
AATTTA	AATTTAT, AATTTAG, AATTTAA,
GTTTCT	GGTTTCT, GTTTCTT, GTTTCTG,
TGCTAA	TTGCTAA, CTGCTAA, ATGCTAA, TGCTAAA,
AGATTT	CAGATTT, AGATTTA,
GAAAAT	TGAAAAT, GAAAATG, TTGAAAA,
GTTTAAT	TTAATCT, GTTTA, TTAATCC, TGTTTAA, GTTTAA,
TTTGACT	CTTTGAC, GCTTTGA,
TCTGA	TCTGACC, ATTCTGA, CTCTGA, TCTGAC, TTCTGAC, TCTGACA, TTCTGAG, TCTGAAG, TCTGAA, TCTGAAT, TCTGAGC, TTCTGAT, GCTCTGA, CTCTGAC, TCTGAG, TCTGATG, TCTGAAA, TCTGAT, TTTCTGA, ATCTGA, TTCTGA, TTCTGAA,
TCTGTT	TCTGTG, TCTGTTG, TCTGT, TCTGTTC, TTCTGTT, TTCTGTG, TCTGTGT, ATCTGTT, TTGTCC, TCTGTTT, CTGTC, TCTGTC, TGTCC, GTCTGTC, TTTCTGT, TTCTGT, TTCTGTC, TCTGTCC,
TTTATTC	TTATTC, TTATTCA, TTATTCT,
TGAAAG	TTGAAAG,
TGTTCT	TGTTCTT, CTGTTCT, TGTTCTC, GTTCT,
CTTTT	CTTTTA, CTTTTCA, GCTTTTA, GGCTTTT, CTTTTAT, CTTTTAA, CTTTTC, TCCTTTT, CTTTTCT, CCTTTTG, GCTTTTC, GCTTTT, CTTTTGA, CCTTTT, CCTTTTA,
ATTTGT	GATTTG, AATTTGT, ATTTGTT, TTATTTG, TGATTTG, CATTTGT, TATTTG, TTTGTGG,
TGAGT	TGAGTGG, TGAGTT, TGAGTA, TGAGTGA, TGAGTG, TGAGTGC,
CCCCAG	CCCAG, TCCCCAG,
TTGCAG	ATTGCAG, TGTTGCA, AATTGCA, CTTGCA, CTTGCAG, TTTTGCA, CTTTGCA, GTTGCAG,
CTGAT	CTGATTT, TGATG,
TAATA	CTAATA, TTAATAG, TTAATAT,
TCTTA	CCTTAAT, TCTTAAA, CTTAAT, CCTTAA, TCTTAA, CTTAA, TCTTACA, TCTTAAT, CTTAAA, CTTAAC, TCTTAG, CTTAAAT,
ATTCT	TAATTCT, ATTCTG, ATTCTAA, AATTCT,
ATCAAA	TCAAAAT, GATCAAA,
CTTTA	CTTTATT,
TTTAG	TTTTAGA, CTTTAG, CTTTTAG, ATTTAG, TCTTTAG, ATTTTAG, ATTTAGA, TTTAGA, TGTTTAG, TTAGA, TATTTAG, GTTTTAG,
TTGCTG	TTTGCTG,
TTTCAT	GTTCATT, TTCAT, TTCATTA, ATTTCAT, TTTTCAT, CTTCATT,
CTTTCA	TTTCAAG, GCTTTC, TTTCAAC, CCTTTC, GCTTTCT, CTTTC, CTTTCT, CTTTCTG, CTTTCC, CCTTTCA, TTTCAAT, GCTTTCA, CTTTCCT, CTTTCCA, CTTTCAA, CCTTTCT, TCCTTTC,
TTCTC	TTTCTC, TCTCAT, TTTCTCA, CTTCTC, TTCTCAG, CTTCTCA, TTTTCTC, ATTTCTC, TTCTCA, CTTTCTC, TTCTCAT, TTTCTCC, TCTTCTC, TCTCA,
TGCTT	TGCTTCC, CTGCTTT, TGCTTC, CTGCTTC, GCTGCTT, CTGCTT, TGCTTGC, TGCTTCT, TTGCTT, GTTGCTT, TGCTTTT, TCTGCTT, TGCTTT, TGCTTG, AATGCT, TGCTTTG, TGTGCTT, TGCTTAA, AATGCTT, TGCTTTA, TTGCTTA, TTGCTTC, CTTGCTT, TGCTTTC, ATGCTTT, TTGCTTT, TGCTTA, TTTGCTT,
TCTGC	TTCTGC, TCTGCA, TTCTGCT, TTCTGCA, TTTCTGC, TCTGCT, TCTGCC, TCTGCCA, TCTGCTG,
CTGAA	TGAAG, CTGAAA, CTGAAAT,
GTAGGT	GTAGGTG,
CTAAA	GCTAA, TCTAAAT, TTCTAAA, GCTAAAT, CTAAAT, TCTAAAA, GCTAAA, CTAAAA, AAGCTAA, TCTAAA,

## Sheet: ISRE-Downstream set
GTAAC	GTAACC, GTAACA, GTAACCA, GTAACT, GTAACTA,
AAGTGT	AAGTGTC,
GTTTGT	GTTTGTT, GTTTGTC, GTTTGTA, GTTTGTG,
ATTAACA	ATATTAA, TTAACA, CTATTAA, TATTAAC,
TGAAG	TTGAAGA, TTGAAG, TGAAGA,
TAACC	TAACCA,
TTGAAAT	TGAAATG, CTTGAAA,
AATTG	AATTGGC,
CTGCT	CCTGCTG, CCTGCT, TGCTGCT, CTCTGCT, TTCTGCT, TCTGCT, GTCTGCT,							Reference:
TTTATG	TTTTATG,							PLoS Genet. 2007 May 25;3(5):e85. Epub 2007 Apr 13. Links Discovery and analysis of evolutionarily conserved intronic splicing regulatory elements. Yeo GW, Nostrand EL, Liang TY. Crick-Jacobs Center for Theoretical and Computational Biology, Salk Institute, La Jolla, California, United States of America. geneyeo@salk.edu Knowledge of the functional cis-regulatory elements that regulate constituti…
TGATAAA	CTGATAA, TGATAA,
ATGTTT	TGTTTGA, GTTTA, GTTTAT, ATGTTTA,
TTTCCAA	TTCCAA,
AAGTC	AAGTCA, AAGTCT,
AAAGA	AAAGAA, TTAAAGA, TAAAGA, AAAGAAA,
GTACGT	GTACGTA, GTACGTG,
GTTAAA	AAGTTAA, AGTTAAA,
GAGCTG	AGCTGCA, TGAGCTG, GAGCT,
TCATTTT	GTCATTT, CTCATTT,
TGCATG	TGCATGA, ATGCATG, CTGCATG, TGCATGC, TGCATGT, TGCATGG, GTGCATG,
TTCTT	TTTCTTT, ATTTCTT, TTCTTTA, TTCTTA, TTTCTTA, TTTTCTT, TTCTTT, TTCTTGG, TTCTTG, TTTCTTG,
TTTATC	TTTATCA,
ACATTT	ACATTTC,
TGCCAGC	TTGCCAG, CTGCCAG, GCCAGCT,
ATAATT	TAATTTT, ATAATTG, TAATTTC, AATAAT, AATAATT, AAATAAT,
GTAGG	GTAGGAA, GTAGGTC, GTAGGAG, GTAGGTT, GTAGGTA, GTAGGA, GTAGGC, GTAGGT, GTAGGTG, GTAGGCA,
GTATCCT	GTATCC, ATCCTTT, ATCCTT, TATCCTT,
CATTTG	CCATTTG, CATTTGA,
ACTAAC	ACTAACT, CACTAA, CACTAAC, CTAAC, TACTAAC, ACTAACA, CTAACC, ACTAACC,
TTTCAG	GTTTCAG, TTCAG, ATTTTCA, CATTTCA, CTTTCAG, TTCAGA, AATTTCA, TTTCAGA, ATTTCAG, TTCAGAA, TTTTCAG,
AATTGA	AATTGAA, AAATTGA,
TTAGCA	TTAGCAA,
CAAAT	TCAAAT, TTCAAAT, AGCAAAT,
TAATG	ATTAATG, CTAATG, TAATGG, GCTAATG, CTAATGG, TCTAATG, TAATGT, TAATGAA,
TTTTGAT	TTGATC, TTTGATG,
AGAAAT	AAGAAAT, TAGAAAT, AGAAATA, GAGAAAT, AGAAATG, CAGAAAT,
TTTCTA	TTTCTAG, ATTTCTA, TTTTCTA, TTCTAG, GTTTTCT, CATTTCT, TTTTTCT, AATTTCT, ATTTTCT, GATTTCT,
TATTTC	TATTTCT, TATTTCA, ATTTCTG, ATTTCCA, TTATTTC, TATTTCC,
TAACT	TAACTT, TTAACTT, TTTAACT, ATTAACT, TTTAAC, TTAACT,
TGAGG	TGAGGCC, TGAGGG, TGAGGC, TGAGGA,
TAAAAT	TAAAATT, TTTAAAA, TAAAATA, TTAAAAT, ATAAAAT, AAAATAA, TAAAATG,
TTTATA	TTTATAG, TTTTATA,
TATCCT	ATATCCT,
GTTAGT	GTTAGTA, GTTAGTT, TTAGT, GTTAG, GTTAGTG,
TTTACAG	TTTACA, TTTTACA,
TATTTG	TTATTTG, TATTTGA,
GTACTGT	GTACTG,
TTAAG	CATTAAG, TTTTAAG,
CATAAA	TCATAAA,
GCATG	AGCATG, GCATGT, GCATGAA, GCATGGC,
TGATTA	ATTGATT, CTGATTA, CTTGATT,
TTTTAAA	CATTTTA, AATTTTA, TATTTTA, TTAAATC,
CTGACT	TGACTTT,
ACTAAT	ACTAATG, ACTAATT, AACTAAT, CACTAAT,
GAGTA	GAGTATT, GAGTATC, GAGTAC, GAGTAA, GAGTAAA, GAGTACC, GAGTAT,
TCTTAA	TCTTAAA, TCTTAAT, CTTAAT, CTTAAA, TTCTTAA, CTTAA,
TTGGTT	TTTGGTT, TTTGGT, TTGGT,
ATATTT	AATATT, ATATTTT,
AGAGCCA	AGCCAAA,
TCTTT	TCTTTA, GTCTTTG, ATCTTT, TCTTTTG, TCTTTGC, TCTTTGA, TGTCTTT, TCTTTAA,
AGTTTT	AGTTTTA,
GTATTT	AGTATTT, GTATT, GTATTTA,
TCAGA	CAGAA, CAGAAA, TCAGAG, TCAGAAA, GTCAGAG, GTCAGA, GTCAGAA, TCAGAA,
TAAGT	TAAGTT, TAAGTTT, TAAGTA, TAAGTTG, TAAGTCC, TAAGTGG, TAAGTAG, TAAGTGA, TAAGTAT, TAAGTC, TAAGTTC, TAAGTAA, TAAGTTA, TAAGTGT, TAAGTCT, TAAGTGC, TAAGTAC, TAAGTCA, TAAGTG,
AAGCA	AAAGCA, AAGCAT, AGCAGA, AAGCAG, AGCAG, CAAAGCA, AAGCAAA, AAGCAGA,
TTCACAG	CACAG, TTCACA, TCACAG,
AGTAA	AGTAAA, AGTAAAT,
TCTGG	CTCTGG, TCTGGC, TTTCTGG, TCTGGG, TTCTGG,
AGCTTT	GCTTTGC, AAGCTTT, AGCTTTG, TAGCTTT, TTAGCTT, GCTTTT, GCTTTGA, AGCTT,
TGATTTG	GATTTG,
TTTTGC	TTTTGCA, TTTTGCT,
TAGAAA	CTAGAAA, TTAGAAA, TAGAA, TCTAGAA, AGAAAC,
GTGAG	GTGAGCA, GTGAGAG, GTGAGGG, GTGAGCT, GTGAGC, GTGAGCC, GTGAGTG, GTGAGAA, GTGAGAC, GTGAGGA, GTGAGTA, GTGAGTT, GTGAGAT, GTGAGA, GTGAGGT, GTGAGGC, GTGAGG,
TTCTGT	TCTGT, TCTGTT, TCTGTG, ATCTGTT, TTCTGTG, TTCTGTT,
GTAAG	GTAAGAT, GTAAGC, GTAAGTC, GTAAGGC, GGTAAG, GTAAGAC, GTAAGTG, GTAAGTA, GTAAGAA, GTAAGT, GTAAGGG, GTAAGCA, GTAAGAG, GTAAGG, GTAAGTT, GTAAGA, GTAAGGA, GTAAGGT, GTAAGCC, GTAAGCT,
ATGAAA	ATGAAAA, ATGAA, ATGAAAT, AATGAAT,
AGAAAA	TAGAAAA, AGAAAAT, CAGAAAA, GAGAAAA,
TGAGC	TGAGCA, TGAGCT, CTGAGC, TCTGAGC, TGAGCAG,
TGGCTT	TTGGCTT, TGGCTTC, GGCTT, TGGCTTT, TGGCTTG, CTGGCTT, GGCTTT,
TTAATCT	TAATCT, TAATCTT,
AATTAT	AATTATT, ATTATTT, AATTATG, AAATTAT, ATTATT,
TGGAAAT	ATGGAAA,
CCACAG	CCCACAG, TCCACAG,
AAATGA	AATGAG, AAAATGA, AAATGAA,
GCAAGT	GCAAG, GCAAGTC, GCAAGTA, GCAAGTG, GCAAGTT,
GTAAAA	GTAAAAA, AGTAAAA, GTAAAAT,
GTCTG	GTCTGT,
AAATGT	AATGTTT, AATGTT, GAAATGT, AAATGTT, AAATGTC,
TGCAT	TGCATT, TGCATTT, AATGCAT, CTGCAT,
GAGAAA	AGAGAAA, GAGAA,
TTAGA	ATTAGA, TTAGAA, AATTAGA, ATTAGAA,
TTTATAA	TTATAA,
GTTTT	TGTTTTA, GTTTTAA, GTTTTA,
GCTTGGC	TTGGCAA, TTGGCAT,
TAAGC	TAAGCT, TAAGCAT, TAAGCAA, TAAGCTT, TAAGCA, TAAGCC, TAAGCAG, TAAGCCA, AAGCCA,
GTATG	GTATGTG, GTATGG, GTATGA, GTATGTA, GTATGAG, GTATGC, AGTATG, GTATGGA, AAGTATG, GTATGAA, GTATGTT, GTATGCA, GTATGT, GTATGGC, GAGTATG, GTATGTC,
AAATT	TAAATT, CAAATTA, TGAAATT, GAAATTA, CAAATT, CTAAATT, TAAATTA, AAATTG, GAAATT, AAAATTC, ATAAATT, TAAATTG, GTAAATT, TAAATTT, TTAAATT,
GTAAT	GTAATGG, GTAATGT, AGTAATT, GTAATGC, GTAATTT, GTAATAA, GTAATGA, GTAATG, AGTAAT, GTAATTC,
TTCTCT	TCTCTG, TTCTCTT, TCTCT, TTCTCTG, CTCTG,
TGAGAA	TGAGA, TGAGAG, TGAGAAA, TGAGAAT,
TTAGTT	TTAGTTT, TTTAGTT,
TAAGG	TAAGGCT, TAAGGAG, TAAGGA, TAAGGCC, TAAGGG, TAAGGAC, TAAGGC, TAAGGAA, AAGGA, AAGGAA, AAGGAAA,
TGTTTAA	GTGTTT, TGTGTTT, GTTTAA, TCTGTTT, GTTTAAA, GTTTAAT,
GTCAGT	TCAGTG, GTCAGTA, GTCAGTC, TCAGTTT, GTCAGTG, TCAGTA, TCAGT, GTCAGTT,
AGAATT	TAGAATT, AAGAATT, AGAAT, AGAATTT, AAGAAT,
TAAATG	ATTAAAT, GTAAATG, TTAAATG, AAATGCT, TAAATGT, AAATGC, AAATGCA, TAAATGC,
AATTCA	TTAATTC, AATTC, GAATTC, TAATTCA, AATTCAA, AAATTCA, TAATTC, AATTCT,
TCCTTT	TTCCTT, TTTCCTT, CCTTTGC, TCCTTTG, TCCTT,
TAAGA	TAAGAT, TAAGAAG, TAAGAC, TAAGAAC, TTAAGA, TAAGAA, TAAGATT, TAAGAAA, TAAGAGA, TAAGAGC, TAAGATG, TAAGAAT, TAAGAG, TAAGAGG,
AAATCA	TAAATCA, AAATCAA, GTAAATC,
TAATTTG	ATTTGAT, ATTTGCT, ATTTGT, ATTTGG,
GAAATA	GAAATAA, TGAAATA,
TGGTTT	TTGGTTT, TGGTTTG,
TGTTAA	TGTTAAT, TGTTAAA, TTGTTAA, TTGTTA,
TGTCT	TGTCTG, TGTCTT, TTGTCTT, TGTCTGT,
GTTGGT	GTTGGTT, GTTGGTA,
TGAATT	TGAATTC, GAATTTG, TGAATTA, TTGAATT, ATGAATT, TGAATTT, GAATTA, GAATTAA,
AATTTA	AATTTAA,
TATGT	TATGTAA, TATGTAT, TATGTA, TATGTT,
GCATTT	CATTTAA, CATTTAT, AGCATTT, CATTTA,
AAGTA	AAGTAG, AAGTATC, AAGTAC, AAGTAT, AAGTACC, AAGTAA, AAGTAAT, AAGTAAA, AAGTATT, AAGTAGA, AAGTACT,
GCTTCT	GCTTCTG,
TTCTAA	TCTAAAT, TCTAA, TCTAAT, TTTCTAA, TTCTAAT, TTCTA, TTCTAAA, TCTAAA,
GTTTCT	TTTCTGT, TGTTTC, GTTTCTT, GTTTCTG, TGTTTCT,
AGATTT	AGATTA, TAGATTT, AGATT, AAGATTT, AGATTTA,
GAAAAT	TGAAAAT, GAAAATG, GAAAATA, TTGAAAA,
TGCTAA	TTTGCTA, TTGCTAA, ATGCTAA,
AAGCT	AAGCTT, AAAGCT,
CTTTGCT	TTGCTGA, TTGCTG, TTTGCTG, TTTGCTC,
TCTGA	TCTGACC, ATTCTGA, CTCTGA, TCTGAC, TTCTGAC, TCTGACA, TTCTGAG, TCTGAAG, CTTCTGA, TCTGAA, TCTGAAT, TTCTGAT, GCTCTGA, TCTGAG, TCTGAT, TCTGAAA, TTTCTGA, TTCTGA, TTCTGAA,
TTTCTC	ATTTCTC, TTTTCTC, TTTCTCA, TTCTCA, TTTCTCT, TTCTC,
TTTATTC	TTATTCA,
TTTGCC	TTTGCCA, TTTGCCT, CTTTGCC,
TGAAAG	TTGAAAG, GAAAG, AGAAAG,
TGTTCT	TGTTCTT, GTTCT, AGTTCT,
CTTTT	CTTTTA, CTTTTGA,
TTTTCTG	TGTTTTC,
TGAGT	TGAGTCC, TGAGTCT, TGAGTTT, TGAGTTG, TGAGTGC, TGAGTGG, TGAGTA, TGAGTGT, TGAGTAG, TGAGTG, TGAGTAA, TGAGTAT, TGAGTAC, TGAGTT, TGAGTGA, TGAGTTA, TGAGTTC,
TTGCAG	CTTGCAG, TGTTGCA, CTTTGCA,
TAATA	TTAATAG, GTTAATA,
AGTAT	GTATC, AGTATT, AGTATC,
ATTCT	TAATTCT, TTATTCT,
TGCCTTT	TGCCTT, TTGCCT, TTGCCTT, GCCTTT,
ATCAAA	TCAAAA,
GAGTG	GAGTGTC, GAGTGGG, GAGTGA, GAGTGTG, GAGTGT, GAGTGG,
TAGGT	TAGGTAT, TAGGTGG, TAGGTA, TAGGTC, TAGGTG,
CTTTA	CTTTATT,
TTTAG	TTTAGAT, TTTTAGA, CTTTTAG, ATTTAG, TTTTAGC, ATTTTAG, TTTAGA, ATTTAGA, TTTAGAA, TTTAGCT,
TGATTTT	GATTTT, CTGATTT,
TTTCAT	TTCAT, ATTTCAT, TTTTCAT,
CTTTCA	TTTCAAG, CTTTC, CTTTCT, CTTTCTG, TCTTTCA, CCTTTCA,
AAGAT	AAGATT, AAGATTA,
TGCTT	CTGCTTT, TGCTTC, CTGCTTC, TTGCTTG, GCTGCTT, CTGCTT, TGCTTGC, TGCTTCT, TTGCTT, TGCTTTT, TCTGCTT, TGCTTT, TGCTTG, TGCTTTG, TGTGCTT, CTGCTTG, TTGCTTC, TGCTTCA, CTTGCTT, TTGCTTT, CCTGCTT, TGCTTA, TTTGCTT,
GTGGGT	GTGGGTA,
GTAAAG	GTAAAGC, GTAAAGT, TAAAGC, GTAAAGA, TAAAGT,
CTGAA	TGCTGAA, CTGAAA, CTGAAAT, CTGAAAA,
TCTGC	TTCTGC, TCTGCA, TCTGCAG, TCTGCAT, TCTCTGC, TGTCTGC, TTTCTGC, CTCTGC,
CTAAA	CTAAAT,

## Sheet: NI-ESE set
AAAAAA	-1	1	-1	AAAAAA
AAAAAC	0.7479	0	0
AAAAAG	1	1	1	AAAAAG					Threshold (positive)	0
AAAAAT	-1	1	-1	AAAAAT					Threshold (NI-score)	0.8
AAAACA	0.8617	0	0		AAAACA	AAAACA
AAAACC	1	1	1	AAAACC
AAAACG	0.9074	0	0		AAAACG	AAAACG
AAAACT	0.9712	0	0		AAAACT	AAAACT
AAAAGA	1	1	1	AAAAGA				Reference:
AAAAGC	1	1	1	AAAAGC				PLoS Genet. 2006 Nov 24;2(11):e191. Epub 2006 Sep 28. Links Inference of splicing regulatory activities by sequence neighborhood analysis. Stadler MB, Shomron N, Yeo GW, Schneider A, Xiao X, Burge CB. Department of Biology, Massachusetts Institute of Technology, Cambridge, Massachusetts, United States of America. michael.stadler@fmi.ch Sequence-specific recognition of nucleic-acid motifs is criti…
AAAAGG	0.671	0	0
AAAAGT	0.6351	0	0
AAAATA	-1	1	-1	AAAATA
AAAATC	0.493	0	0
AAAATG	-1	1	-1	AAAATG
AAAATT	-0.4522	0	0
AAACAA	0.9414	0	0		AAACAA	AAACAA
AAACAC	0.7668	0	0
AAACAG	1	1	1	AAACAG
AAACAT	0.5503	0	0
AAACCA	1	1	1	AAACCA
AAACCC	0.9948	0	0		AAACCC	AAACCC
AAACCG	0.9468	0	0		AAACCG	AAACCG
AAACCT	1	1	1	AAACCT
AAACGA	1	1	1	AAACGA
AAACGC	0.3027	0	0
AAACGG	0.5459	0	0
AAACGT	0.1974	0	0
AAACTA	0.5503	0	0
AAACTC	1	1	1	AAACTC
AAACTG	1	1	1	AAACTG
AAACTT	0.6351	0	0
AAAGAA	1	1	1	AAAGAA
AAAGAC	1	1	1	AAAGAC
AAAGAG	1	1	1	AAAGAG
AAAGAT	1	1	1	AAAGAT
AAAGCA	1	1	1	AAAGCA
AAAGCC	0.9973	0	0		AAAGCC	AAAGCC
AAAGCG	0.978	0	0		AAAGCG	AAAGCG
AAAGCT	1	1	1	AAAGCT
AAAGGA	1	1	1	AAAGGA
AAAGGC	0.3027	0	0
AAAGGG	-0.2326	0	0
AAAGGT	-0.2153	0	0
AAAGTA	0.5717	0	0
AAAGTC	0.3027	0	0
AAAGTG	1	1	1	AAAGTG
AAAGTT	0.2636	0	0
AAATAA	-1	1	-1	AAATAA
AAATAC	0	0	0
AAATAG	-0.3364	0	0
AAATAT	-1	1	-1	AAATAT
AAATCA	0.6351	0	0
AAATCC	1	1	1	AAATCC
AAATCG	0.112	0	0
AAATCT	0.3746	0	0
AAATGA	-1	1	-1	AAATGA
AAATGC	-1	1	-1	AAATGC
AAATGG	-1	1	-1	AAATGG
AAATGT	-1	1	-1	AAATGT
AAATTA	-0.8854	0	0		AAATTA		AAATTA
AAATTC	0.1974	0	0
AAATTG	0.1651	0	0
AAATTT	-0.8136	0	0		AAATTT		AAATTT
AACAAA	0.7818	0	0
AACAAC	1	1	1	AACAAC
AACAAG	1	1	1	AACAAG
AACAAT	0.5459	0	0
AACACA	0.3364	0	0
AACACC	1	1	1	AACACC
AACACG	0.8854	0	0		AACACG	AACACG
AACACT	0.7818	0	0
AACAGA	1	1	1	AACAGA
AACAGC	1	1	1	AACAGC
AACAGG	0.9973	0	0		AACAGG	AACAGG
AACAGT	0.7818	0	0
AACATA	0	0	0
AACATC	0.9973	0	0		AACATC	AACATC
AACATG	1	1	1	AACATG
AACATT	0.4219	0	0
AACCAA	1	1	1	AACCAA
AACCAC	0.9468	0	0		AACCAC	AACCAC
AACCAG	1	1	1	AACCAG
AACCAT	0.7668	0	0
AACCCA	1	1	1	AACCCA
AACCCC	0.4942	0	0
AACCCG	0.8854	0	0		AACCCG	AACCCG
AACCCT	1	1	1	AACCCT
AACCGA	1	1	1	AACCGA
AACCGC	0.1489	0	0
AACCGG	0.8483	0	0		AACCGG	AACCGG
AACCGT	0.112	0	0
AACCTA	0.664	0	0
AACCTC	0.7668	0	0
AACCTG	1	1	1	AACCTG
AACCTT	-1	1	-1	AACCTT
AACGAA	1	1	1	AACGAA
AACGAC	1	0	0		AACGAC	AACGAC
AACGAG	1	1	1	AACGAG
AACGAT	0.9074	0	0		AACGAT	AACGAT
AACGCA	0.4219	0	0
AACGCC	0.04996	0	0
AACGCG	0.04996	0	0
AACGCT	0.1974	0	0
AACGGA	1	1	1	AACGGA
AACGGC	0.1489	0	0
AACGGG	0.1651	0	0
AACGGT	0.112	0	0
AACGTA	0	0	0
AACGTC	0	0	0
AACGTG	0.8854	0	0		AACGTG	AACGTG
AACGTT	-0.1489	0	0
AACTAA	0.2449	0	0
AACTAC	1	1	1	AACTAC
AACTAG	0.3746	0	0
AACTAT	-0.1651	0	0
AACTCA	0.4621	0	0
AACTCC	0.9468	0	0		AACTCC	AACTCC
AACTCG	0.2913	0	0
AACTCT	1	1	1	AACTCT
AACTGA	1	1	1	AACTGA
AACTGC	0.8483	0	0		AACTGC	AACTGC
AACTGG	1	1	1	AACTGG
AACTGT	0.664	0	0
AACTTA	0.3027	0	0
AACTTC	1	1	1	AACTTC
AACTTG	0.9468	0	0		AACTTG	AACTTG
AACTTT	0.2153	0	0
AAGAAA	1	1	1	AAGAAA
AAGAAC	1	1	1	AAGAAC
AAGAAG	1	1	1	AAGAAG
AAGAAT	1	1	1	AAGAAT
AAGACA	1	1	1	AAGACA
AAGACC	1	1	1	AAGACC
AAGACG	1	1	1	AAGACG
AAGACT	1	1	1	AAGACT
AAGAGA	1	1	1	AAGAGA
AAGAGC	0.9919	0	0		AAGAGC	AAGAGC
AAGAGG	1	1	1	AAGAGG
AAGAGT	0.9468	0	0		AAGAGT	AAGAGT
AAGATA	1	1	1	AAGATA
AAGATC	1	1	1	AAGATC
AAGATG	1	1	1	AAGATG
AAGATT	0.8005	0	0		AAGATT	AAGATT
AAGCAA	1	1	1	AAGCAA
AAGCAC	0.9919	0	0		AAGCAC	AAGCAC
AAGCAG	1	1	1	AAGCAG
AAGCAT	0.6351	0	0
AAGCCA	1	1	1	AAGCCA
AAGCCC	0.9468	0	0		AAGCCC	AAGCCC
AAGCCG	1	1	1	AAGCCG
AAGCCT	0.9973	0	0		AAGCCT	AAGCCT
AAGCGA	1	1	1	AAGCGA
AAGCGC	0.4621	0	0
AAGCGG	1	1	1	AAGCGG
AAGCGT	0.4621	0	0
AAGCTA	1	1	1	AAGCTA
AAGCTC	1	1	1	AAGCTC
AAGCTG	1	1	1	AAGCTG
AAGCTT	0.3746	0	0
AAGGAA	1	1	1	AAGGAA
AAGGAC	1	1	1	AAGGAC
AAGGAG	1	1	1	AAGGAG
AAGGAT	1	1	1	AAGGAT
AAGGCA	0.2153	0	0
AAGGCC	0.2913	0	0
AAGGCG	0.3027	0	0
AAGGCT	0.3027	0	0
AAGGGA	0.537	0	0
AAGGGC	0	0	0
AAGGGG	-1	1	-1	AAGGGG
AAGGGT	-0.7668	0	0
AAGGTA	-1	1	-1	AAGGTA
AAGGTC	0.2153	0	0
AAGGTG	0	0	0
AAGGTT	-0.7243	0	0
AAGTAA	0.4136	0	0
AAGTAC	1	1	1	AAGTAC
AAGTAG	1	1	1	AAGTAG
AAGTAT	-1	1	-1	AAGTAT
AAGTCA	0.1974	0	0
AAGTCC	0.1974	0	0
AAGTCG	0.3027	0	0
AAGTCT	-0.1651	0	0
AAGTGA	0.9081	0	0		AAGTGA	AAGTGA
AAGTGC	0.2449	0	0
AAGTGG	1	1	1	AAGTGG
AAGTGT	-0.5503	0	0
AAGTTA	-0.5503	0	0
AAGTTC	0.2636	0	0
AAGTTG	0.2913	0	0
AAGTTT	-1	1	-1	AAGTTT
AATAAA	-1	1	-1	AATAAA
AATAAC	0.1651	0	0
AATAAG	0.3364	0	0
AATAAT	-0.7668	0	0
AATACA	0	0	0
AATACC	0.4621	0	0
AATACG	1	1	1	AATACG
AATACT	-0.2449	0	0
AATAGA	0.3364	0	0
AATAGC	0.1489	0	0
AATAGG	-0.537	0	0
AATAGT	-0.2913	0	0
AATATA	-0.9712	0	0		AATATA		AATATA
AATATC	-0.3364	0	0
AATATG	-0.3364	0	0
AATATT	-0.8854	0	0		AATATT		AATATT
AATCAA	1	1	1	AATCAA
AATCAC	0.6351	0	0
AATCAG	1	1	1	AATCAG
AATCAT	0.4219	0	0
AATCCA	1	1	1	AATCCA
AATCCC	0.1489	0	0
AATCCG	0.5459	0	0
AATCCT	0.5459	0	0
AATCGA	0.7818	0	0
AATCGC	0	0	0
AATCGG	0.1974	0	0
AATCGT	-0.1489	0	0
AATCTA	0.1651	0	0
AATCTC	0.1974	0	0
AATCTG	0.9919	0	0		AATCTG	AATCTG
AATCTT	-0.1974	0	0
AATGAA	1	1	1	AATGAA
AATGAC	1	1	1	AATGAC
AATGAG	0.7163	0	0
AATGAT	-1	1	-1	AATGAT
AATGCA	-1	1	-1	AATGCA
AATGCC	-0.4219	0	0
AATGCG	-0.4219	0	0
AATGCT	-1	1	-1	AATGCT
AATGGA	1	1	1	AATGGA
AATGGC	-0.3746	0	0
AATGGG	-1	1	-1	AATGGG
AATGGT	-1	1	-1	AATGGT
AATGTA	-1	1	-1	AATGTA
AATGTC	-1	1	-1	AATGTC
AATGTG	-0.537	0	0
AATGTT	-1	1	-1	AATGTT
AATTAA	-0.6351	0	0
AATTAC	0.1651	0	0
AATTAG	-0.2449	0	0
AATTAT	-0.8854	0	0		AATTAT		AATTAT
AATTCA	0.2449	0	0
AATTCC	0.04996	0	0
AATTCG	0.112	0	0
AATTCT	-0.3027	0	0
AATTGA	0.537	0	0
AATTGC	-0.04996	0	0
AATTGG	0.1651	0	0
AATTGT	-0.7818	0	0
AATTTA	-1	1	-1	AATTTA
AATTTC	-0.5459	0	0
AATTTG	-0.6351	0	0
AATTTT	-0.9848	0	0		AATTTT		AATTTT
ACAAAA	-1	1	-1	ACAAAA
ACAAAC	0.6351	0	0
ACAAAG	1	1	1	ACAAAG
ACAAAT	-0.2913	0	0
ACAACA	0.8483	0	0		ACAACA	ACAACA
ACAACC	0.9973	0	0		ACAACC	ACAACC
ACAACG	1	1	1	ACAACG
ACAACT	1	1	1	ACAACT
ACAAGA	1	1	1	ACAAGA
ACAAGC	1	1	1	ACAAGC
ACAAGG	0.9468	0	0		ACAAGG	ACAAGG
ACAAGT	0.978	0	0		ACAAGT	ACAAGT
ACAATA	0	0	0
ACAATC	0.7818	0	0
ACAATG	0.3364	0	0
ACAATT	0.1974	0	0
ACACAA	0.2153	0	0
ACACAC	-1	1	-1	ACACAC
ACACAG	0.3364	0	0
ACACAT	-0.4219	0	0
ACACCA	0.4621	0	0
ACACCC	0.1974	0	0
ACACCG	0.2913	0	0
ACACCT	0.8854	0	0		ACACCT	ACACCT
ACACGA	0.8854	0	0		ACACGA	ACACGA
ACACGC	0	0	0
ACACGG	0.1489	0	0
ACACGT	0	0	0
ACACTA	-0.1489	0	0
ACACTC	0	0	0
ACACTG	0.7818	0	0
ACACTT	0	0	0
ACAGAA	1	1	1	ACAGAA
ACAGAC	0.9712	0	0		ACAGAC	ACAGAC
ACAGAG	1	1	1	ACAGAG
ACAGAT	0.6351	0	0
ACAGCA	0.9468	0	0		ACAGCA	ACAGCA
ACAGCC	0.6351	0	0
ACAGCG	0.4621	0	0
ACAGCT	0.978	0	0		ACAGCT	ACAGCT
ACAGGA	1	1	1	ACAGGA
ACAGGC	0.4621	0	0
ACAGGG	0.1974	0	0
ACAGGT	0.1489	0	0
ACAGTA	0.1489	0	0
ACAGTC	0.04996	0	0
ACAGTG	0.6351	0	0
ACAGTT	-0.04996	0	0
ACATAA	-0.537	0	0
ACATAC	-0.6351	0	0
ACATAG	-0.2153	0	0
ACATAT	-1	1	-1	ACATAT
ACATCA	0.7818	0	0
ACATCC	0.4621	0	0
ACATCG	0.6351	0	0
ACATCT	1	1	1	ACATCT
ACATGA	1	1	1	ACATGA
ACATGC	0.2913	0	0
ACATGG	0.3364	0	0
ACATGT	0	0	0
ACATTA	0	0	0
ACATTC	0.1489	0	0
ACATTG	1	1	1	ACATTG
ACATTT	-0.2153	0	0
ACCAAA	0.9074	0	0		ACCAAA	ACCAAA
ACCAAC	1	1	1	ACCAAC
ACCAAG	1	1	1	ACCAAG
ACCAAT	0.8854	0	0		ACCAAT	ACCAAT
ACCACA	0.2913	0	0
ACCACC	0.8854	0	0		ACCACC	ACCACC
ACCACG	1	1	1	ACCACG
ACCACT	0.5459	0	0
ACCAGA	1	1	1	ACCAGA
ACCAGC	1	1	1	ACCAGC
ACCAGG	0.9712	0	0		ACCAGG	ACCAGG
ACCAGT	1	1	1	ACCAGT
ACCATA	0.2913	0	0
ACCATC	1	1	1	ACCATC
ACCATG	0.8854	0	0		ACCATG	ACCATG
ACCATT	0.8854	0	0		ACCATT	ACCATT
ACCCAA	0.8854	0	0		ACCCAA	ACCCAA
ACCCAC	0.4219	0	0
ACCCAG	1	1	1	ACCCAG
ACCCAT	0.4621	0	0
ACCCCA	0.04996	0	0
ACCCCC	0	0	0
ACCCCG	0.4621	0	0
ACCCCT	0.4621	0	0
ACCCGA	0.6351	0	0
ACCCGC	0.2913	0	0
ACCCGG	1	1	1	ACCCGG
ACCCGT	0.4621	0	0
ACCCTA	0.6351	0	0
ACCCTC	0.8854	0	0		ACCCTC	ACCCTC
ACCCTG	1	1	1	ACCCTG
ACCCTT	1	1	1	ACCCTT
ACCGAA	1	1	1	ACCGAA
ACCGAC	1	1	1	ACCGAC
ACCGAG	0.9919	0	0		ACCGAG	ACCGAG
ACCGAT	0.4621	0	0
ACCGCA	0.1489	0	0
ACCGCC	0.04996	0	0
ACCGCG	0.04996	0	0
ACCGCT	0.04996	0	0
ACCGGA	1	1	1	ACCGGA
ACCGGC	0.8854	0	0		ACCGGC	ACCGGC
ACCGGG	0.7818	0	0
ACCGGT	0.6351	0	0
ACCGTA	0.1489	0	0
ACCGTC	0.1489	0	0
ACCGTG	0.2913	0	0
ACCGTT	-0.112	0	0
ACCTAA	0.1489	0	0
ACCTAC	0.4621	0	0
ACCTAG	0.4621	0	0
ACCTAT	0.112	0	0
ACCTCA	0.4621	0	0
ACCTCC	0.4621	0	0
ACCTCG	0.8854	0	0		ACCTCG	ACCTCG
ACCTCT	1	1	1	ACCTCT
ACCTGA	1	1	1	ACCTGA
ACCTGC	1	1	1	ACCTGC
ACCTGG	1	1	1	ACCTGG
ACCTGT	1	1	1	ACCTGT
ACCTTA	0.1974	0	0
ACCTTC	0.664	0	0
ACCTTG	1	1	1	ACCTTG
ACCTTT	0.4219	0	0
ACGAAA	1	1	1	ACGAAA
ACGAAC	1	1	1	ACGAAC
ACGAAG	1	1	1	ACGAAG
ACGAAT	0.9992	0	0		ACGAAT	ACGAAT
ACGACA	0.9973	0	0		ACGACA	ACGACA
ACGACC	1	1	1	ACGACC
ACGACG	0.978	0	0		ACGACG	ACGACG
ACGACT	1	1	1	ACGACT
ACGAGA	1	1	1	ACGAGA
ACGAGC	0.9919	0	0		ACGAGC	ACGAGC
ACGAGG	0.7668	0	0
ACGAGT	0.7818	0	0
ACGATA	0.5459	0	0
ACGATC	1	1	1	ACGATC
ACGATG	0.7818	0	0
ACGATT	1	1	1	ACGATT
ACGCAA	1	1	1	ACGCAA
ACGCAC	0.112	0	0
ACGCAG	0.4621	0	0
ACGCAT	-0.112	0	0
ACGCCA	0.1489	0	0
ACGCCC	0.04996	0	0
ACGCCG	0.04996	0	0
ACGCCT	0.1489	0	0
ACGCGA	0.4621	0	0
ACGCGC	0	0	0
ACGCGG	0.2913	0	0
ACGCGT	0	0	0
ACGCTA	0.1489	0	0
ACGCTC	0.2913	0	0
ACGCTG	0.4621	0	0
ACGCTT	0.112	0	0
ACGGAA	0.9998	0	0		ACGGAA	ACGGAA
ACGGAC	0.8854	0	0		ACGGAC	ACGGAC
ACGGAG	0.9919	0	0		ACGGAG	ACGGAG
ACGGAT	0.6351	0	0
ACGGCA	0	0	0
ACGGCC	0.04996	0	0
ACGGCG	0.04996	0	0
ACGGCT	0.4621	0	0
ACGGGA	0.7818	0	0
ACGGGC	0	0	0
ACGGGG	-0.3027	0	0
ACGGGT	-0.1489	0	0
ACGGTA	-0.2913	0	0
ACGGTC	0.1489	0	0
ACGGTG	0	0	0
ACGGTT	-0.112	0	0
ACGTAA	0.1651	0	0
ACGTAC	0.1489	0	0
ACGTAG	0.1651	0	0
ACGTAT	-0.3027	0	0
ACGTCA	0.1974	0	0
ACGTCC	0.04996	0	0
ACGTCG	0.4621	0	0
ACGTCT	0.1974	0	0
ACGTGA	1	1	1	ACGTGA
ACGTGC	0.4621	0	0
ACGTGG	1	1	1	ACGTGG
ACGTGT	0.3027	0	0
ACGTTA	-0.112	0	0
ACGTTC	-0.5459	0	0
ACGTTG	0.2913	0	0
ACGTTT	-0.1974	0	0
ACTAAA	0	0	0
ACTAAC	0.2913	0	0
ACTAAG	0.3027	0	0
ACTAAT	-0.04996	0	0
ACTACA	1	1	1	ACTACA
ACTACC	0.2913	0	0
ACTACG	0.5459	0	0
ACTACT	0.4621	0	0
ACTAGA	0.537	0	0
ACTAGC	0	0	0
ACTAGG	-1	1	-1	ACTAGG
ACTAGT	-0.112	0	0
ACTATA	0	0	0
ACTATC	0.1489	0	0
ACTATG	0	0	0
ACTATT	-0.1974	0	0
ACTCAA	0.6351	0	0
ACTCAC	0	0	0
ACTCAG	0.6351	0	0
ACTCAT	0	0	0
ACTCCA	0.7818	0	0
ACTCCC	0.04996	0	0
ACTCCG	0.1974	0	0
ACTCCT	0.2913	0	0
ACTCGA	0.6351	0	0
ACTCGC	0	0	0
ACTCGG	0.1974	0	0
ACTCGT	-0.04996	0	0
ACTCTA	0.112	0	0
ACTCTC	0.1489	0	0
ACTCTG	1	1	1	ACTCTG
ACTCTT	0.1974	0	0
ACTGAA	1	1	1	ACTGAA
ACTGAC	1	1	1	ACTGAC
ACTGAG	1	1	1	ACTGAG
ACTGAT	0.664	0	0
ACTGCA	0.664	0	0
ACTGCC	0.4621	0	0
ACTGCG	0.1489	0	0
ACTGCT	0.3027	0	0
ACTGGA	1	1	1	ACTGGA
ACTGGC	0.7818	0	0
ACTGGG	0.2153	0	0
ACTGGT	0.3027	0	0
ACTGTA	0.1651	0	0
ACTGTC	0.112	0	0
ACTGTG	0.7818	0	0
ACTGTT	-0.3364	0	0
ACTTAA	0.1974	0	0
ACTTAC	0	0	0
ACTTAG	-0.2449	0	0
ACTTAT	-0.4621	0	0
ACTTCA	1	1	1	ACTTCA
ACTTCC	0.4621	0	0
ACTTCG	1	1	1	ACTTCG
ACTTCT	0.4355	0	0
ACTTGA	1	1	1	ACTTGA
ACTTGC	0.1489	0	0
ACTTGG	0.4355	0	0
ACTTGT	-0.1651	0	0
ACTTTA	-0.4355	0	0
ACTTTC	-0.2913	0	0
ACTTTG	0.2449	0	0
ACTTTT	-0.6351	0	0
AGAAAA	1	1	1	AGAAAA
AGAAAC	1	1	1	AGAAAC
AGAAAG	1	1	1	AGAAAG
AGAAAT	0.8393	0	0		AGAAAT	AGAAAT
AGAACA	1	1	1	AGAACA
AGAACC	1	1	1	AGAACC
AGAACG	1	1	1	AGAACG
AGAACT	1	1	1	AGAACT
AGAAGA	1	1	1	AGAAGA
AGAAGC	1	1	1	AGAAGC
AGAAGG	1	1	1	AGAAGG
AGAAGT	1	1	1	AGAAGT
AGAATA	0.4621	0	0
AGAATC	1	1	1	AGAATC
AGAATG	1	1	1	AGAATG
AGAATT	0.7668	0	0
AGACAA	1	1	1	AGACAA
AGACAC	1	1	1	AGACAC
AGACAG	0.9919	0	0		AGACAG	AGACAG
AGACAT	1	1	1	AGACAT
AGACCA	1	1	1	AGACCA
AGACCC	1	1	1	AGACCC
AGACCG	0.8483	0	0		AGACCG	AGACCG
AGACCT	1	1	1	AGACCT
AGACGA	1	1	1	AGACGA
AGACGC	0.8854	0	0		AGACGC	AGACGC
AGACGG	0.1651	0	0
AGACGT	0.8483	0	0		AGACGT	AGACGT
AGACTA	0.3364	0	0
AGACTC	0.9919	0	0		AGACTC	AGACTC
AGACTG	0.978	0	0		AGACTG	AGACTG
AGACTT	0.5459	0	0
AGAGAA	1	1	1	AGAGAA
AGAGAC	1	1	1	AGAGAC
AGAGAG	1	1	1	AGAGAG
AGAGAT	1	1	1	AGAGAT
AGAGCA	0.9973	0	0		AGAGCA	AGAGCA
AGAGCC	0.7818	0	0
AGAGCG	0.1489	0	0
AGAGCT	0.9468	0	0		AGAGCT	AGAGCT
AGAGGA	1	1	1	AGAGGA
AGAGGC	1	1	1	AGAGGC
AGAGGG	0.4136	0	0
AGAGGT	0.9074	0	0		AGAGGT	AGAGGT
AGAGTA	0.2153	0	0
AGAGTC	0.6351	0	0
AGAGTG	0.4219	0	0
AGAGTT	-0.1651	0	0
AGATAA	0.3364	0	0
AGATAC	0.8854	0	0		AGATAC	AGATAC
AGATAG	-0.2636	0	0
AGATAT	0.4136	0	0
AGATCA	0.9712	0	0		AGATCA	AGATCA
AGATCC	1	1	1	AGATCC
AGATCG	0.3364	0	0
AGATCT	0.8617	0	0		AGATCT	AGATCT
AGATGA	1	1	1	AGATGA
AGATGC	1	1	1	AGATGC
AGATGG	-1	1	-1	AGATGG
AGATGT	1	1	1	AGATGT
AGATTA	-1	1	-1	AGATTA
AGATTC	0.4355	0	0
AGATTG	-0.1651	0	0
AGATTT	-0.3027	0	0
AGCAAA	1	1	1	AGCAAA
AGCAAC	0.9973	0	0		AGCAAC	AGCAAC
AGCAAG	1	1	1	AGCAAG
AGCAAT	0.978	0	0		AGCAAT	AGCAAT
AGCACA	0.7818	0	0
AGCACC	0.8854	0	0		AGCACC	AGCACC
AGCACG	0.7818	0	0
AGCACT	1	1	1	AGCACT
AGCAGA	1	1	1	AGCAGA
AGCAGC	1	1	1	AGCAGC
AGCAGG	1	1	1	AGCAGG
AGCAGT	1	1	1	AGCAGT
AGCATA	0.3364	0	0
AGCATC	1	1	1	AGCATC
AGCATG	0.664	0	0
AGCATT	1	1	1	AGCATT
AGCCAA	0.7818	0	0
AGCCAC	0.2913	0	0
AGCCAG	0.3027	0	0
AGCCAT	0.3027	0	0
AGCCCA	0.4621	0	0
AGCCCC	0.4621	0	0
AGCCCG	0	0	0
AGCCCT	1	1	1	AGCCCT
AGCCGA	0.5459	0	0
AGCCGC	0.1974	0	0
AGCCGG	-1	1	-1	AGCCGG
AGCCGT	0.4355	0	0
AGCCTA	0.4621	0	0
AGCCTC	1	1	1	AGCCTC
AGCCTG	0.9074	0	0		AGCCTG	AGCCTG
AGCCTT	1	1	1	AGCCTT
AGCGAA	0.8854	0	0		AGCGAA	AGCGAA
AGCGAC	0.6351	0	0
AGCGAG	0.7818	0	0
AGCGAT	0.1489	0	0
AGCGCA	0	0	0
AGCGCC	0	0	0
AGCGCG	0	0	0
AGCGCT	0.2913	0	0
AGCGGA	0.978	0	0		AGCGGA	AGCGGA
AGCGGC	0.2913	0	0
AGCGGG	0.1651	0	0
AGCGGT	0.3027	0	0
AGCGTA	-0.112	0	0
AGCGTC	0.2913	0	0
AGCGTG	0	0	0
AGCGTT	0.1651	0	0
AGCTAA	0.3027	0	0
AGCTAC	0.2913	0	0
AGCTAG	0.2449	0	0
AGCTAT	0.3027	0	0
AGCTCA	0.4621	0	0
AGCTCC	0.6351	0	0
AGCTCG	0.3027	0	0
AGCTCT	1	1	1	AGCTCT
AGCTGA	1	1	1	AGCTGA
AGCTGC	0.9973	0	0		AGCTGC	AGCTGC
AGCTGG	1	1	1	AGCTGG
AGCTGT	1	1	1	AGCTGT
AGCTTA	-0.3364	0	0
AGCTTC	0.4219	0	0
AGCTTG	0.1974	0	0
AGCTTT	0.2913	0	0
AGGAAA	1	1	1	AGGAAA
AGGAAC	1	1	1	AGGAAC
AGGAAG	1	1	1	AGGAAG
AGGAAT	1	1	1	AGGAAT
AGGACA	1	1	1	AGGACA
AGGACC	1	1	1	AGGACC
AGGACG	0.9998	0	0		AGGACG	AGGACG
AGGACT	1	1	1	AGGACT
AGGAGA	1	1	1	AGGAGA
AGGAGC	1	1	1	AGGAGC
AGGAGG	1	1	1	AGGAGG
AGGAGT	1	1	1	AGGAGT
AGGATA	0.493	0	0
AGGATC	1	1	1	AGGATC
AGGATG	0.7132	0	0
AGGATT	1	1	1	AGGATT
AGGCAA	0.3364	0	0
AGGCAC	0.1974	0	0
AGGCAG	0.2449	0	0
AGGCAT	-1	1	-1	AGGCAT
AGGCCA	0.4621	0	0
AGGCCC	0.4621	0	0
AGGCCG	0.1974	0	0
AGGCCT	0.3027	0	0
AGGCGA	0.4621	0	0
AGGCGC	0.1489	0	0
AGGCGG	0	0	0
AGGCGT	-0.1974	0	0
AGGCTA	0	0	0
AGGCTC	1	1	1	AGGCTC
AGGCTG	0.5459	0	0
AGGCTT	-0.3746	0	0
AGGGAA	0.4355	0	0
AGGGAC	0.6351	0	0
AGGGAG	1	1	1	AGGGAG
AGGGAT	-0.3103	0	0
AGGGCA	0	0	0
AGGGCC	0.04996	0	0
AGGGCG	0	0	0
AGGGCT	-0.112	0	0
AGGGGA	-0.5717	0	0
AGGGGC	-0.2449	0	0
AGGGGG	-1	1	-1	AGGGGG
AGGGGT	-1	1	-1	AGGGGT
AGGGTA	-1	1	-1	AGGGTA
AGGGTC	-0.2153	0	0
AGGGTG	-1	1	-1	AGGGTG
AGGGTT	-1	1	-1	AGGGTT
AGGTAA	-1	1	-1	AGGTAA
AGGTAC	-0.3364	0	0
AGGTAG	-1	1	-1	AGGTAG
AGGTAT	-1	1	-1	AGGTAT
AGGTCA	-0.1651	0	0
AGGTCC	0.2913	0	0
AGGTCG	-0.2913	0	0
AGGTCT	-0.2449	0	0
AGGTGA	1	1	1	AGGTGA
AGGTGC	0.1974	0	0
AGGTGG	-1	1	-1	AGGTGG
AGGTGT	-0.493	0	0
AGGTTA	-1	1	-1	AGGTTA
AGGTTC	-0.2153	0	0
AGGTTG	-0.8483	0	0		AGGTTG		AGGTTG
AGGTTT	-1	1	-1	AGGTTT
AGTAAA	0.3103	0	0
AGTAAC	0.2913	0	0
AGTAAG	-0.2636	0	0
AGTAAT	-0.1974	0	0
AGTACA	0.4219	0	0
AGTACC	0.2913	0	0
AGTACG	0	0	0
AGTACT	0.3027	0	0
AGTAGA	1	1	1	AGTAGA
AGTAGC	0.4219	0	0
AGTAGG	-1	1	-1	AGTAGG
AGTAGT	-0.3103	0	0
AGTATA	-1	1	-1	AGTATA
AGTATC	-0.2153	0	0
AGTATG	-0.6351	0	0
AGTATT	-0.6351	0	0
AGTCAA	1	1	1	AGTCAA
AGTCAC	0.2913	0	0
AGTCAG	0.2449	0	0
AGTCAT	-0.2449	0	0
AGTCCA	0.3027	0	0
AGTCCC	0	0	0
AGTCCG	-1	1	-1	AGTCCG
AGTCCT	0.2153	0	0
AGTCGA	0.5459	0	0
AGTCGC	0	0	0
AGTCGG	-0.4621	0	0
AGTCGT	-1	1	-1	AGTCGT
AGTCTA	-0.1974	0	0
AGTCTC	0.112	0	0
AGTCTG	-0.112	0	0
AGTCTT	-0.3027	0	0
AGTGAA	1	1	1	AGTGAA
AGTGAC	1	1	1	AGTGAC
AGTGAG	1	1	1	AGTGAG
AGTGAT	0.3364	0	0
AGTGCA	0.2449	0	0
AGTGCC	0.04996	0	0
AGTGCG	0.1651	0	0
AGTGCT	-0.1651	0	0
AGTGGA	1	1	1	AGTGGA
AGTGGC	0.537	0	0
AGTGGG	-0.4136	0	0
AGTGGT	-0.4621	0	0
AGTGTA	-1	1	-1	AGTGTA
AGTGTC	-0.3364	0	0
AGTGTG	-0.5459	0	0
AGTGTT	-1	1	-1	AGTGTT
AGTTAA	-0.4355	0	0
AGTTAC	-0.3027	0	0
AGTTAG	-1	1	-1	AGTTAG
AGTTAT	-0.9973	0	0		AGTTAT		AGTTAT
AGTTCA	-0.5459	0	0
AGTTCC	-0.664	0	0
AGTTCG	-1	1	-1	AGTTCG
AGTTCT	-1	1	-1	AGTTCT
AGTTGA	0.4355	0	0
AGTTGC	-0.112	0	0
AGTTGG	-0.7243	0	0
AGTTGT	-1	1	-1	AGTTGT
AGTTTA	-1	1	-1	AGTTTA
AGTTTC	-1	1	-1	AGTTTC
AGTTTG	-1	1	-1	AGTTTG
AGTTTT	-1	1	-1	AGTTTT
ATAAAA	-1	1	-1	ATAAAA
ATAAAC	-0.4219	0	0
ATAAAG	-0.3552	0	0
ATAAAT	-1	1	-1	ATAAAT
ATAACA	-0.112	0	0
ATAACC	0.1489	0	0
ATAACG	0.112	0	0
ATAACT	-0.3364	0	0
ATAAGA	0.4219	0	0
ATAAGC	0.3027	0	0
ATAAGG	-0.4219	0	0
ATAAGT	-0.5459	0	0
ATAATA	-0.9919	0	0		ATAATA		ATAATA
ATAATC	-0.1974	0	0
ATAATG	-1	1	-1	ATAATG
ATAATT	-1	1	-1	ATAATT
ATACAA	-0.2636	0	0
ATACAC	-0.1974	0	0
ATACAG	0	0	0
ATACAT	-1	1	-1	ATACAT
ATACCA	0.112	0	0
ATACCC	0.04996	0	0
ATACCG	0	0	0
ATACCT	0	0	0
ATACGA	0.3027	0	0
ATACGC	0	0	0
ATACGG	0.112	0	0
ATACGT	-0.1974	0	0
ATACTA	-1	1	-1	ATACTA
ATACTC	-0.1974	0	0
ATACTG	-0.2449	0	0
ATACTT	-1	1	-1	ATACTT
ATAGAA	0.4621	0	0
ATAGAC	0.3027	0	0
ATAGAG	0.2153	0	0
ATAGAT	-1	1	-1	ATAGAT
ATAGCA	0.04996	0	0
ATAGCC	0	0	0
ATAGCG	0	0	0
ATAGCT	-0.1974	0	0
ATAGGA	0.2913	0	0
ATAGGC	-0.4219	0	0
ATAGGG	-1	1	-1	ATAGGG
ATAGGT	-0.9712	0	0		ATAGGT		ATAGGT
ATAGTA	-0.8854	0	0		ATAGTA		ATAGTA
ATAGTC	-0.112	0	0
ATAGTG	-0.664	0	0
ATAGTT	-1	1	-1	ATAGTT
ATATAA	-1	1	-1	ATATAA
ATATAC	-0.9468	0	0		ATATAC		ATATAC
ATATAG	-1	1	-1	ATATAG
ATATAT	-1	1	-1	ATATAT
ATATCA	-0.4219	0	0
ATATCC	0.2153	0	0
ATATCG	-0.1974	0	0
ATATCT	-1	1	-1	ATATCT
ATATGA	-0.3103	0	0
ATATGC	-1	1	-1	ATATGC
ATATGG	-0.6469	0	0
ATATGT	-1	1	-1	ATATGT
ATATTA	-1	1	-1	ATATTA
ATATTC	-0.4219	0	0
ATATTG	-0.664	0	0
ATATTT	-1	1	-1	ATATTT
ATCAAA	1	1	1	ATCAAA
ATCAAC	0.9973	0	0		ATCAAC	ATCAAC
ATCAAG	1	1	1	ATCAAG
ATCAAT	1	1	1	ATCAAT
ATCACA	0.1489	0	0
ATCACC	0.2913	0	0
ATCACG	0.1489	0	0
ATCACT	0.1489	0	0
ATCAGA	1	1	1	ATCAGA
ATCAGC	1	1	1	ATCAGC
ATCAGG	0.9074	0	0		ATCAGG	ATCAGG
ATCAGT	0.978	0	0		ATCAGT	ATCAGT
ATCATA	0	0	0
ATCATC	0.7818	0	0
ATCATG	0.2636	0	0
ATCATT	-0.2913	0	0
ATCCAA	1	1	1	ATCCAA
ATCCAC	0.4621	0	0
ATCCAG	0.9919	0	0		ATCCAG	ATCCAG
ATCCAT	0.2449	0	0
ATCCCA	0.1489	0	0
ATCCCC	0.04996	0	0
ATCCCG	0.2913	0	0
ATCCCT	0.1489	0	0
ATCCGA	0.6351	0	0
ATCCGC	0.2913	0	0
ATCCGG	1	1	1	ATCCGG
ATCCGT	-0.1651	0	0
ATCCTA	0.1974	0	0
ATCCTC	0.8854	0	0		ATCCTC	ATCCTC
ATCCTG	1	1	1	ATCCTG
ATCCTT	0	0	0
ATCGAA	0.9973	0	0		ATCGAA	ATCGAA
ATCGAC	0.4621	0	0
ATCGAG	0.6351	0	0
ATCGAT	0.1974	0	0
ATCGCA	0	0	0
ATCGCC	0.04996	0	0
ATCGCG	0.04996	0	0
ATCGCT	0.04996	0	0
ATCGGA	0.7818	0	0
ATCGGC	0.6351	0	0
ATCGGG	0.1651	0	0
ATCGGT	1	1	1	ATCGGT
ATCGTA	-0.1489	0	0
ATCGTC	0.4621	0	0
ATCGTG	0.04996	0	0
ATCGTT	-0.5459	0	0
ATCTAA	0	0	0
ATCTAC	0.3027	0	0
ATCTAG	-0.1651	0	0
ATCTAT	-0.4219	0	0
ATCTCA	0.112	0	0
ATCTCC	1	1	1	ATCTCC
ATCTCG	0.1489	0	0
ATCTCT	-0.3364	0	0
ATCTGA	1	1	1	ATCTGA
ATCTGC	1	1	1	ATCTGC
ATCTGG	1	1	1	ATCTGG
ATCTGT	0.4522	0	0
ATCTTA	-0.4355	0	0
ATCTTC	1	1	1	ATCTTC
ATCTTG	0.3027	0	0
ATCTTT	-0.664	0	0
ATGAAA	1	1	1	ATGAAA
ATGAAC	0.9998	0	0		ATGAAC	ATGAAC
ATGAAG	1	1	1	ATGAAG
ATGAAT	0.5717	0	0
ATGACA	0.3364	0	0
ATGACC	0.978	0	0		ATGACC	ATGACC
ATGACG	0.9468	0	0		ATGACG	ATGACG
ATGACT	0.4219	0	0
ATGAGA	1	1	1	ATGAGA
ATGAGC	0.7818	0	0
ATGAGG	0.9081	0	0		ATGAGG	ATGAGG
ATGAGT	0.1651	0	0
ATGATA	-1	1	-1	ATGATA
ATGATC	0.537	0	0
ATGATG	1	1	1	ATGATG
ATGATT	-0.4136	0	0
ATGCAA	0.3799	0	0
ATGCAC	-0.3027	0	0
ATGCAG	0.493	0	0
ATGCAT	-1	1	-1	ATGCAT
ATGCCA	0.112	0	0
ATGCCC	0.1489	0	0
ATGCCG	0.1489	0	0
ATGCCT	-0.2913	0	0
ATGCGA	0.4621	0	0
ATGCGC	0	0	0
ATGCGG	0.4219	0	0
ATGCGT	-0.4621	0	0
ATGCTA	-0.664	0	0
ATGCTC	0.2913	0	0
ATGCTG	0.5503	0	0
ATGCTT	-1	1	-1	ATGCTT
ATGGAA	1	1	1	ATGGAA
ATGGAC	1	0	0		ATGGAC	ATGGAC
ATGGAG	0.9985	0	0		ATGGAG	ATGGAG
ATGGAT	1	1	1	ATGGAT
ATGGCA	0	0	0
ATGGCC	0.4621	0	0
ATGGCG	1	1	1	ATGGCG
ATGGCT	0.2153	0	0
ATGGGA	-0.4621	0	0
ATGGGC	-0.4219	0	0
ATGGGG	-1	1	-1	ATGGGG
ATGGGT	-1	1	-1	ATGGGT
ATGGTA	-1	1	-1	ATGGTA
ATGGTC	1	1	1	ATGGTC
ATGGTG	-0.3799	0	0
ATGGTT	-1	1	-1	ATGGTT
ATGTAA	-1	1	-1	ATGTAA
ATGTAC	-0.5459	0	0
ATGTAG	-0.5964	0	0
ATGTAT	-1	1	-1	ATGTAT
ATGTCA	-1	1	-1	ATGTCA
ATGTCC	-0.2449	0	0
ATGTCG	0	0	0
ATGTCT	-1	1	-1	ATGTCT
ATGTGA	0.2636	0	0
ATGTGC	0.4355	0	0
ATGTGG	1	1	1	ATGTGG
ATGTGT	-1	1	-1	ATGTGT
ATGTTA	-1	1	-1	ATGTTA
ATGTTC	-0.537	0	0
ATGTTG	-0.3364	0	0
ATGTTT	-1	1	-1	ATGTTT
ATTAAA	-1	1	-1	ATTAAA
ATTAAC	-0.664	0	0
ATTAAG	0	0	0
ATTAAT	-1	1	-1	ATTAAT
ATTACA	-0.112	0	0
ATTACC	-0.04996	0	0
ATTACG	0	0	0
ATTACT	-0.6351	0	0
ATTAGA	0	0	0
ATTAGC	-0.112	0	0
ATTAGG	-1	1	-1	ATTAGG
ATTAGT	-0.9973	0	0		ATTAGT		ATTAGT
ATTATA	-0.978	0	0		ATTATA		ATTATA
ATTATC	-0.1489	0	0
ATTATG	-0.9074	0	0		ATTATG		ATTATG
ATTATT	-1	1	-1	ATTATT
ATTCAA	0.537	0	0
ATTCAC	0.3027	0	0
ATTCAG	1	1	1	ATTCAG
ATTCAT	-0.7243	0	0
ATTCCA	0.04996	0	0
ATTCCC	0	0	0
ATTCCG	-0.1974	0	0
ATTCCT	-0.4219	0	0
ATTCGA	0.2913	0	0
ATTCGC	0	0	0
ATTCGG	0.112	0	0
ATTCGT	-0.7818	0	0
ATTCTA	-0.8854	0	0		ATTCTA		ATTCTA
ATTCTC	-0.2913	0	0
ATTCTG	0	0	0
ATTCTT	-0.978	0	0		ATTCTT		ATTCTT
ATTGAA	1	1	1	ATTGAA
ATTGAC	1	1	1	ATTGAC
ATTGAG	1	1	1	ATTGAG
ATTGAT	0	0	0
ATTGCA	0.112	0	0
ATTGCC	0.04996	0	0
ATTGCG	0.2913	0	0
ATTGCT	-0.4621	0	0
ATTGGA	1	1	1	ATTGGA
ATTGGC	0.1489	0	0
ATTGGG	-0.6351	0	0
ATTGGT	-0.2449	0	0
ATTGTA	-0.7243	0	0
ATTGTC	-0.1651	0	0
ATTGTG	-0.1974	0	0
ATTGTT	-1	1	-1	ATTGTT
ATTTAA	-1	1	-1	ATTTAA
ATTTAC	-1	1	-1	ATTTAC
ATTTAG	-0.8617	0	0		ATTTAG		ATTTAG
ATTTAT	-1	1	-1	ATTTAT
ATTTCA	-0.664	0	0
ATTTCC	-0.4219	0	0
ATTTCG	-0.3027	0	0
ATTTCT	-1	1	-1	ATTTCT
ATTTGA	-0.2153	0	0
ATTTGC	-0.4219	0	0
ATTTGG	-0.3746	0	0
ATTTGT	-1	1	-1	ATTTGT
ATTTTA	-1	1	-1	ATTTTA
ATTTTC	-0.8483	0	0		ATTTTC		ATTTTC
ATTTTG	-0.978	0	0		ATTTTG		ATTTTG
ATTTTT	-1	1	-1	ATTTTT
CAAAAA	0.632	0	0
CAAAAC	1	1	1	CAAAAC
CAAAAG	1	1	1	CAAAAG
CAAAAT	0.3799	0	0
CAAACA	1	1	1	CAAACA
CAAACC	0.9468	0	0		CAAACC	CAAACC
CAAACG	0.4219	0	0
CAAACT	1	1	1	CAAACT
CAAAGA	1	1	1	CAAAGA
CAAAGC	0.8854	0	0		CAAAGC	CAAAGC
CAAAGG	0.5459	0	0
CAAAGT	0.6351	0	0
CAAATA	-0.4621	0	0
CAAATC	0.3027	0	0
CAAATG	-1	1	-1	CAAATG
CAAATT	0.112	0	0
CAACAA	0.978	0	0		CAACAA	CAACAA
CAACAC	0.7818	0	0
CAACAG	0.9468	0	0		CAACAG	CAACAG
CAACAT	0.7818	0	0
CAACCA	1	1	1	CAACCA
CAACCC	0.8854	0	0		CAACCC	CAACCC
CAACCG	0.2913	0	0
CAACCT	0.9074	0	0		CAACCT	CAACCT
CAACGA	1	1	1	CAACGA
CAACGC	0.2913	0	0
CAACGG	0.4621	0	0
CAACGT	0.6351	0	0
CAACTA	0.4355	0	0
CAACTC	0.6351	0	0
CAACTG	0.9074	0	0		CAACTG	CAACTG
CAACTT	1	1	1	CAACTT
CAAGAA	1	1	1	CAAGAA
CAAGAC	1	1	1	CAAGAC
CAAGAG	0.9998	0	0		CAAGAG	CAAGAG
CAAGAT	1	1	1	CAAGAT
CAAGCA	0.9928	0	0		CAAGCA	CAAGCA
CAAGCC	1	1	1	CAAGCC
CAAGCG	0.6351	0	0
CAAGCT	0.9919	0	0		CAAGCT	CAAGCT
CAAGGA	1	1	1	CAAGGA
CAAGGC	0.6351	0	0
CAAGGG	0.1651	0	0
CAAGGT	0.2153	0	0
CAAGTA	1	1	1	CAAGTA
CAAGTC	0.4621	0	0
CAAGTG	0.3364	0	0
CAAGTT	0.2449	0	0
CAATAA	0	0	0
CAATAC	0.2913	0	0
CAATAG	0.04996	0	0
CAATAT	-0.112	0	0
CAATCA	1	1	1	CAATCA
CAATCC	0.4621	0	0
CAATCG	0.04996	0	0
CAATCT	0.1489	0	0
CAATGA	0.6351	0	0
CAATGC	-0.4621	0	0
CAATGG	-0.4219	0	0
CAATGT	-0.6351	0	0
CAATTA	0.112	0	0
CAATTC	0.04996	0	0
CAATTG	0	0	0
CAATTT	-0.3027	0	0
CACAAA	0.4136	0	0
CACAAC	1	1	1	CACAAC
CACAAG	0.978	0	0		CACAAG	CACAAG
CACAAT	0.2913	0	0
CACACA	-1	1	-1	CACACA
CACACC	0	0	0
CACACG	-0.1489	0	0
CACACT	0.1651	0	0
CACAGA	1	1	1	CACAGA
CACAGC	0.2913	0	0
CACAGG	0.6351	0	0
CACAGT	0.04996	0	0
CACATA	-1	1	-1	CACATA
CACATC	0.3027	0	0
CACATG	0.1651	0	0
CACATT	0.112	0	0
CACCAA	1	1	1	CACCAA
CACCAC	0.4621	0	0
CACCAG	0.978	0	0		CACCAG	CACCAG
CACCAT	0.6351	0	0
CACCCA	0.664	0	0
CACCCC	0.1489	0	0
CACCCG	0.2913	0	0
CACCCT	1	1	1	CACCCT
CACCGA	1	1	1	CACCGA
CACCGC	0.04996	0	0
CACCGG	0.4621	0	0
CACCGT	0.2913	0	0
CACCTA	0.3027	0	0
CACCTC	0.4621	0	0
CACCTG	1	1	1	CACCTG
CACCTT	0.5459	0	0
CACGAA	1	1	1	CACGAA
CACGAC	0.978	0	0		CACGAC	CACGAC
CACGAG	0.7818	0	0
CACGAT	0.7818	0	0
CACGCA	0.1651	0	0
CACGCC	0.04996	0	0
CACGCG	0	0	0
CACGCT	0.04996	0	0
CACGGA	1	1	1	CACGGA
CACGGC	0.1489	0	0
CACGGG	0.04996	0	0
CACGGT	0.04996	0	0
CACGTA	0.1651	0	0
CACGTC	0	0	0
CACGTG	0.4621	0	0
CACGTT	0	0	0
CACTAA	0.1974	0	0
CACTAC	0.1974	0	0
CACTAG	-0.2913	0	0
CACTAT	-0.04996	0	0
CACTCA	0.112	0	0
CACTCC	0.04996	0	0
CACTCG	0	0	0
CACTCT	0.2913	0	0
CACTGA	1	1	1	CACTGA
CACTGC	0.4621	0	0
CACTGG	0.8854	0	0		CACTGG	CACTGG
CACTGT	0.1489	0	0
CACTTA	0	0	0
CACTTC	0.4621	0	0
CACTTG	0.2913	0	0
CACTTT	-0.1489	0	0
CAGAAA	1	1	1	CAGAAA
CAGAAC	1	1	1	CAGAAC
CAGAAG	1	1	1	CAGAAG
CAGAAT	1	1	1	CAGAAT
CAGACA	0.8617	0	0		CAGACA	CAGACA
CAGACC	0.9999	0	0		CAGACC	CAGACC
CAGACG	0.9468	0	0		CAGACG	CAGACG
CAGACT	1	1	1	CAGACT
CAGAGA	1	1	1	CAGAGA
CAGAGC	0.7818	0	0
CAGAGG	1	1	1	CAGAGG
CAGAGT	0.8854	0	0		CAGAGT	CAGAGT
CAGATA	0.3364	0	0
CAGATC	1	1	1	CAGATC
CAGATG	0.7243	0	0
CAGATT	0.1974	0	0
CAGCAA	1	1	1	CAGCAA
CAGCAC	0.9919	0	0		CAGCAC	CAGCAC
CAGCAG	1	1	1	CAGCAG
CAGCAT	0.9919	0	0		CAGCAT	CAGCAT
CAGCCA	0.9468	0	0		CAGCCA	CAGCCA
CAGCCC	1	1	1	CAGCCC
CAGCCG	0.664	0	0
CAGCCT	1	1	1	CAGCCT
CAGCGA	0.8854	0	0		CAGCGA	CAGCGA
CAGCGC	0.2913	0	0
CAGCGG	0.6351	0	0
CAGCGT	1	1	1	CAGCGT
CAGCTA	0.9468	0	0		CAGCTA	CAGCTA
CAGCTC	1	1	1	CAGCTC
CAGCTG	1	1	1	CAGCTG
CAGCTT	0.978	0	0		CAGCTT	CAGCTT
CAGGAA	1	1	1	CAGGAA
CAGGAC	1	1	1	CAGGAC
CAGGAG	1	1	1	CAGGAG
CAGGAT	1	0	0		CAGGAT	CAGGAT
CAGGCA	-0.112	0	0
CAGGCC	0.4621	0	0
CAGGCG	0.1489	0	0
CAGGCT	0.6351	0	0
CAGGGA	0.8854	0	0		CAGGGA	CAGGGA
CAGGGC	0.04996	0	0
CAGGGG	-0.3364	0	0
CAGGGT	-0.3027	0	0
CAGGTA	-0.4355	0	0
CAGGTC	0.2913	0	0
CAGGTG	0.3027	0	0
CAGGTT	-0.1974	0	0
CAGTAA	0.4621	0	0
CAGTAC	0.2913	0	0
CAGTAG	0.5459	0	0
CAGTAT	-0.1974	0	0
CAGTCA	0.4621	0	0
CAGTCC	0.112	0	0
CAGTCG	0.112	0	0
CAGTCT	0.2913	0	0
CAGTGA	1	1	1	CAGTGA
CAGTGC	0.2913	0	0
CAGTGG	0.7668	0	0
CAGTGT	0	0	0
CAGTTA	-0.112	0	0
CAGTTC	-0.1651	0	0
CAGTTG	0	0	0
CAGTTT	-0.9468	0	0		CAGTTT		CAGTTT
CATAAA	-1	1	-1	CATAAA
CATAAC	0.1974	0	0
CATAAG	0.1974	0	0
CATAAT	-0.3027	0	0
CATACA	-1	1	-1	CATACA
CATACC	-0.04996	0	0
CATACG	0	0	0
CATACT	-0.2449	0	0
CATAGA	0	0	0
CATAGC	0	0	0
CATAGG	-0.4219	0	0
CATAGT	-0.2913	0	0
CATATA	-1	1	-1	CATATA
CATATC	-0.3364	0	0
CATATG	-0.5503	0	0
CATATT	-0.8854	0	0		CATATT		CATATT
CATCAA	0.9074	0	0		CATCAA	CATCAA
CATCAC	0.2913	0	0
CATCAG	1	1	1	CATCAG
CATCAT	0.2913	0	0
CATCCA	0.1651	0	0
CATCCC	0.04996	0	0
CATCCG	0.2913	0	0
CATCCT	0.6351	0	0
CATCGA	0.6351	0	0
CATCGC	0.04996	0	0
CATCGG	0.2913	0	0
CATCGT	0.04996	0	0
CATCTA	0.1651	0	0
CATCTC	0.6351	0	0
CATCTG	1	1	1	CATCTG
CATCTT	0.3364	0	0
CATGAA	0.8393	0	0		CATGAA	CATGAA
CATGAC	0.6351	0	0
CATGAG	0.9468	0	0		CATGAG	CATGAG
CATGAT	0.2449	0	0
CATGCA	-1	1	-1	CATGCA
CATGCC	0.112	0	0
CATGCG	-0.04996	0	0
CATGCT	-0.3027	0	0
CATGGA	0.8617	0	0		CATGGA	CATGGA
CATGGC	0.04996	0	0
CATGGG	-0.8854	0	0		CATGGG		CATGGG
CATGGT	-0.3027	0	0
CATGTA	-1	1	-1	CATGTA
CATGTC	-0.7818	0	0
CATGTG	0	0	0
CATGTT	-0.664	0	0
CATTAA	-0.4219	0	0
CATTAC	-0.04996	0	0
CATTAG	-0.1974	0	0
CATTAT	-0.6351	0	0
CATTCA	0.2913	0	0
CATTCC	-0.04996	0	0
CATTCG	-0.04996	0	0
CATTCT	-0.4621	0	0
CATTGA	1	1	1	CATTGA
CATTGC	0.4621	0	0
CATTGG	0.7818	0	0
CATTGT	0.2153	0	0
CATTTA	-0.8483	0	0		CATTTA		CATTTA
CATTTC	-0.4621	0	0
CATTTG	-0.3027	0	0
CATTTT	-1	1	-1	CATTTT
CCAAAA	0.6997	0	0
CCAAAC	0.4621	0	0
CCAAAG	0.4621	0	0
CCAAAT	-0.04996	0	0
CCAACA	1	1	1	CCAACA
CCAACC	0.7818	0	0
CCAACG	0.7818	0	0
CCAACT	0.978	0	0		CCAACT	CCAACT
CCAAGA	1	1	1	CCAAGA
CCAAGC	0.4621	0	0
CCAAGG	0.9468	0	0		CCAAGG	CCAAGG
CCAAGT	0.2913	0	0
CCAATA	0.112	0	0
CCAATC	0.1489	0	0
CCAATG	0.1974	0	0
CCAATT	0	0	0
CCACAA	0.1974	0	0
CCACAC	0	0	0
CCACAG	0.04996	0	0
CCACAT	0.112	0	0
CCACCA	0.5459	0	0
CCACCC	0.2913	0	0
CCACCG	0.1489	0	0
CCACCT	1	1	1	CCACCT
CCACGA	1	1	1	CCACGA
CCACGC	0.2913	0	0
CCACGG	0.4621	0	0
CCACGT	0.4621	0	0
CCACTA	-1	1	-1	CCACTA
CCACTC	0	0	0
CCACTG	0.5459	0	0
CCACTT	0.112	0	0
CCAGAA	1	1	1	CCAGAA
CCAGAC	1	1	1	CCAGAC
CCAGAG	0.9919	0	0		CCAGAG	CCAGAG
CCAGAT	0.9468	0	0		CCAGAT	CCAGAT
CCAGCA	1	1	1	CCAGCA
CCAGCC	1	1	1	CCAGCC
CCAGCG	0.7818	0	0
CCAGCT	1	1	1	CCAGCT
CCAGGA	1	1	1	CCAGGA
CCAGGC	0.6351	0	0
CCAGGG	0.1651	0	0
CCAGGT	0.1974	0	0
CCAGTA	0.664	0	0
CCAGTC	1	1	1	CCAGTC
CCAGTG	1	1	1	CCAGTG
CCAGTT	0.6351	0	0
CCATAA	0	0	0
CCATAC	0	0	0
CCATAG	0.04996	0	0
CCATAT	-0.2913	0	0
CCATCA	0.9468	0	0		CCATCA	CCATCA
CCATCC	0.1489	0	0
CCATCG	0.1489	0	0
CCATCT	0.7818	0	0
CCATGA	0.7818	0	0
CCATGC	0	0	0
CCATGG	0.2913	0	0
CCATGT	-0.1489	0	0
CCATTA	-0.112	0	0
CCATTC	0.1974	0	0
CCATTG	1	1	1	CCATTG
CCATTT	-0.1974	0	0
CCCAAA	0	0	0
CCCAAC	0.4621	0	0
CCCAAG	0.6351	0	0
CCCAAT	0	0	0
CCCACA	0	0	0
CCCACC	0.04996	0	0
CCCACG	0.4621	0	0
CCCACT	0	0	0
CCCAGA	0.9919	0	0		CCCAGA	CCCAGA
CCCAGC	0.8854	0	0		CCCAGC	CCCAGC
CCCAGG	1	1	1	CCCAGG
CCCAGT	0.6351	0	0
CCCATA	-0.04996	0	0
CCCATC	0.04996	0	0
CCCATG	0.1489	0	0
CCCATT	0.04996	0	0
CCCCAA	0.05411	0	0
CCCCAC	0.04996	0	0
CCCCAG	0.1489	0	0
CCCCAT	0.04996	0	0
CCCCCA	0	0	0
CCCCCC	0	0	0
CCCCCG	0	0	0
CCCCCT	0.314	0	0
CCCCGA	0.6351	0	0
CCCCGC	0.04996	0	0
CCCCGG	0.671	0	0
CCCCGT	0	0	0
CCCCTA	-0.04996	0	0
CCCCTC	0	0	0
CCCCTG	0.9919	0	0		CCCCTG	CCCCTG
CCCCTT	0.1611	0	0
CCCGAA	0.9468	0	0		CCCGAA	CCCGAA
CCCGAC	0.6351	0	0
CCCGAG	0.4621	0	0
CCCGAT	0.04996	0	0
CCCGCA	0.2913	0	0
CCCGCC	0.1489	0	0
CCCGCG	0	0	0
CCCGCT	0.2913	0	0
CCCGGA	1	1	1	CCCGGA
CCCGGC	0.8854	0	0		CCCGGC	CCCGGC
CCCGGG	0.6997	0	0
CCCGGT	0.2913	0	0
CCCGTA	0.04996	0	0
CCCGTC	0.04996	0	0
CCCGTG	0.4621	0	0
CCCGTT	-0.112	0	0
CCCTAA	0.04996	0	0
CCCTAC	0.04996	0	0
CCCTAG	0.1489	0	0
CCCTAT	0	0	0
CCCTCA	0.2913	0	0
CCCTCC	0.1489	0	0
CCCTCG	0.4621	0	0
CCCTCT	0.1489	0	0
CCCTGA	1	1	1	CCCTGA
CCCTGC	1	1	1	CCCTGC
CCCTGG	1	1	1	CCCTGG
CCCTGT	0.9919	0	0		CCCTGT	CCCTGT
CCCTTA	0.2913	0	0
CCCTTC	0.3027	0	0
CCCTTG	1	1	1	CCCTTG
CCCTTT	0.1611	0	0
CCGAAA	0.9468	0	0		CCGAAA	CCGAAA
CCGAAC	0.8854	0	0		CCGAAC	CCGAAC
CCGAAG	1	1	1	CCGAAG
CCGAAT	0.8854	0	0		CCGAAT	CCGAAT
CCGACA	0.7818	0	0
CCGACC	0.7818	0	0
CCGACG	0.8854	0	0		CCGACG	CCGACG
CCGACT	1	1	1	CCGACT
CCGAGA	0.7818	0	0
CCGAGC	0.4621	0	0
CCGAGG	1	1	1	CCGAGG
CCGAGT	0.1489	0	0
CCGATA	0	0	0
CCGATC	0.3027	0	0
CCGATG	0.1489	0	0
CCGATT	0.2913	0	0
CCGCAA	0.2913	0	0
CCGCAC	0	0	0
CCGCAG	0.4621	0	0
CCGCAT	0.04996	0	0
CCGCCA	0.04996	0	0
CCGCCC	0.1489	0	0
CCGCCG	0	0	0
CCGCCT	0.7818	0	0
CCGCGA	0.2913	0	0
CCGCGC	0	0	0
CCGCGG	0.04996	0	0
CCGCGT	0.04996	0	0
CCGCTA	-0.04996	0	0
CCGCTC	0.112	0	0
CCGCTG	0.6351	0	0
CCGCTT	0	0	0
CCGGAA	1	1	1	CCGGAA
CCGGAC	0.9919	0	0		CCGGAC	CCGGAC
CCGGAG	1	1	1	CCGGAG
CCGGAT	1	1	1	CCGGAT
CCGGCA	0.7818	0	0
CCGGCC	0.4621	0	0
CCGGCG	0.4621	0	0
CCGGCT	1	1	1	CCGGCT
CCGGGA	1	1	1	CCGGGA
CCGGGC	0.1489	0	0
CCGGGG	0.2644	0	0
CCGGGT	0.4621	0	0
CCGGTA	0.1489	0	0
CCGGTC	0	0	0
CCGGTG	0.6351	0	0
CCGGTT	0.2913	0	0
CCGTAA	0.04996	0	0
CCGTAC	-0.04996	0	0
CCGTAG	0.1974	0	0
CCGTAT	0.1489	0	0
CCGTCA	0.1489	0	0
CCGTCC	-0.04996	0	0
CCGTCG	0.2913	0	0
CCGTCT	0.1489	0	0
CCGTGA	0.9468	0	0		CCGTGA	CCGTGA
CCGTGC	0.1974	0	0
CCGTGG	0.9468	0	0		CCGTGG	CCGTGG
CCGTGT	0.04996	0	0
CCGTTA	-0.1489	0	0
CCGTTC	-1	1	-1	CCGTTC
CCGTTG	0	0	0
CCGTTT	-0.2913	0	0
CCTAAA	0	0	0
CCTAAC	0.04996	0	0
CCTAAG	0.1489	0	0
CCTAAT	0	0	0
CCTACA	0.4219	0	0
CCTACC	0.04996	0	0
CCTACG	0	0	0
CCTACT	0.2913	0	0
CCTAGA	0.4621	0	0
CCTAGC	0	0	0
CCTAGG	-0.4621	0	0
CCTAGT	-0.04996	0	0
CCTATA	-0.04996	0	0
CCTATC	0	0	0
CCTATG	0.1974	0	0
CCTATT	-0.112	0	0
CCTCAA	0.6351	0	0
CCTCAC	0.2913	0	0
CCTCAG	0.6351	0	0
CCTCAT	0.1489	0	0
CCTCCA	0.7818	0	0
CCTCCC	0.1489	0	0
CCTCCG	0.1489	0	0
CCTCCT	1	1	1	CCTCCT
CCTCGA	1	1	1	CCTCGA
CCTCGC	0.2913	0	0
CCTCGG	0.4219	0	0
CCTCGT	0.2913	0	0
CCTCTA	0.1651	0	0
CCTCTC	0.1489	0	0
CCTCTG	1	1	1	CCTCTG
CCTCTT	0.3027	0	0
CCTGAA	1	1	1	CCTGAA
CCTGAC	1	1	1	CCTGAC
CCTGAG	1	1	1	CCTGAG
CCTGAT	0.9973	0	0		CCTGAT	CCTGAT
CCTGCA	1	1	1	CCTGCA
CCTGCC	1	1	1	CCTGCC
CCTGCG	0.7668	0	0
CCTGCT	1	1	1	CCTGCT
CCTGGA	1	1	1	CCTGGA
CCTGGC	0.664	0	0
CCTGGG	-1	1	-1	CCTGGG
CCTGGT	0.5459	0	0
CCTGTA	0.7243	0	0
CCTGTC	0.978	0	0		CCTGTC	CCTGTC
CCTGTG	1	1	1	CCTGTG
CCTGTT	1	1	1	CCTGTT
CCTTAA	0.2913	0	0
CCTTAC	0.04996	0	0
CCTTAG	-0.1651	0	0
CCTTAT	-0.2913	0	0
CCTTCA	1	1	1	CCTTCA
CCTTCC	0.112	0	0
CCTTCG	0.3027	0	0
CCTTCT	0.1651	0	0
CCTTGA	1	1	1	CCTTGA
CCTTGC	0.7818	0	0
CCTTGG	1	1	1	CCTTGG
CCTTGT	0.4219	0	0
CCTTTA	0	0	0
CCTTTC	-0.1489	0	0
CCTTTG	0.6351	0	0
CCTTTT	-0.2133	0	0
CGAAAA	1	1	1	CGAAAA
CGAAAC	0.9998	0	0		CGAAAC	CGAAAC
CGAAAG	0.9998	0	0		CGAAAG	CGAAAG
CGAAAT	0.3027	0	0
CGAACA	1	1	1	CGAACA
CGAACC	0.978	0	0		CGAACC	CGAACC
CGAACG	0.7818	0	0
CGAACT	0.8854	0	0		CGAACT	CGAACT
CGAAGA	1	1	1	CGAAGA
CGAAGC	0.9973	0	0		CGAAGC	CGAAGC
CGAAGG	1	1	1	CGAAGG
CGAAGT	0.9973	0	0		CGAAGT	CGAAGT
CGAATA	0.6351	0	0
CGAATC	0.7818	0	0
CGAATG	1	1	1	CGAATG
CGAATT	0.1489	0	0
CGACAA	0.9468	0	0		CGACAA	CGACAA
CGACAC	1	1	1	CGACAC
CGACAG	0.6351	0	0
CGACAT	0.7818	0	0
CGACCA	0.9992	0	0		CGACCA	CGACCA
CGACCC	0.7818	0	0
CGACCG	0.4621	0	0
CGACCT	0.8854	0	0		CGACCT	CGACCT
CGACGA	1	1	1	CGACGA
CGACGC	0.2913	0	0
CGACGG	0.2913	0	0
CGACGT	0.4621	0	0
CGACTA	0.3027	0	0
CGACTC	0.8854	0	0		CGACTC	CGACTC
CGACTG	1	1	1	CGACTG
CGACTT	0.6351	0	0
CGAGAA	0.9998	0	0		CGAGAA	CGAGAA
CGAGAC	0.9468	0	0		CGAGAC	CGAGAC
CGAGAG	0.8854	0	0		CGAGAG	CGAGAG
CGAGAT	0.8854	0	0		CGAGAT	CGAGAT
CGAGCA	1	1	1	CGAGCA
CGAGCC	0.6351	0	0
CGAGCG	0.1489	0	0
CGAGCT	0.8854	0	0		CGAGCT	CGAGCT
CGAGGA	1	1	1	CGAGGA
CGAGGC	0.6351	0	0
CGAGGG	0	0	0
CGAGGT	0.3027	0	0
CGAGTA	0.4621	0	0
CGAGTC	0.2913	0	0
CGAGTG	0.4621	0	0
CGAGTT	0	0	0
CGATAA	0.1489	0	0
CGATAC	0.1489	0	0
CGATAG	-0.04996	0	0
CGATAT	0.1489	0	0
CGATCA	1	1	1	CGATCA
CGATCC	0.5459	0	0
CGATCG	0.112	0	0
CGATCT	0.3027	0	0
CGATGA	0.978	0	0		CGATGA	CGATGA
CGATGC	0.2913	0	0
CGATGG	0.2153	0	0
CGATGT	0.04996	0	0
CGATTA	0.1651	0	0
CGATTC	1	1	1	CGATTC
CGATTG	0.6351	0	0
CGATTT	0.112	0	0
CGCAAA	0.4621	0	0
CGCAAC	0.4621	0	0
CGCAAG	0.7818	0	0
CGCAAT	0.04996	0	0
CGCACA	0	0	0
CGCACC	0.04996	0	0
CGCACG	0	0	0
CGCACT	0.1489	0	0
CGCAGA	0.8854	0	0		CGCAGA	CGCAGA
CGCAGC	0.2913	0	0
CGCAGG	0.5459	0	0
CGCAGT	0.04996	0	0
CGCATA	-0.1489	0	0
CGCATC	0.1489	0	0
CGCATG	0.1974	0	0
CGCATT	0.1489	0	0
CGCCAA	0.04996	0	0
CGCCAC	0.1489	0	0
CGCCAG	0.04996	0	0
CGCCAT	0.04996	0	0
CGCCCA	0	0	0
CGCCCC	0	0	0
CGCCCG	0.04996	0	0
CGCCCT	0.4621	0	0
CGCCGA	0.2913	0	0
CGCCGC	0.04996	0	0
CGCCGG	0.112	0	0
CGCCGT	0.04996	0	0
CGCCTA	0.04996	0	0
CGCCTC	0.1489	0	0
CGCCTG	1	1	1	CGCCTG
CGCCTT	0.2913	0	0
CGCGAA	0.4621	0	0
CGCGAC	0.04996	0	0
CGCGAG	0.1489	0	0
CGCGAT	0	0	0
CGCGCA	0.04996	0	0
CGCGCC	0	0	0
CGCGCG	0	0	0
CGCGCT	0	0	0
CGCGGA	0.7818	0	0
CGCGGC	0.04996	0	0
CGCGGG	0	0	0
CGCGGT	0	0	0
CGCGTA	0	0	0
CGCGTC	0	0	0
CGCGTG	0.04996	0	0
CGCGTT	0	0	0
CGCTAA	0	0	0
CGCTAC	0	0	0
CGCTAG	0.04996	0	0
CGCTAT	0	0	0
CGCTCA	0	0	0
CGCTCC	-0.04996	0	0
CGCTCG	0	0	0
CGCTCT	0.1974	0	0
CGCTGA	0.978	0	0		CGCTGA	CGCTGA
CGCTGC	0.4621	0	0
CGCTGG	1	1	1	CGCTGG
CGCTGT	0.7818	0	0
CGCTTA	-0.1489	0	0
CGCTTC	0.04996	0	0
CGCTTG	0.2913	0	0
CGCTTT	-0.04996	0	0
CGGAAA	0.9998	0	0		CGGAAA	CGGAAA
CGGAAC	1	1	1	CGGAAC
CGGAAG	1	1	1	CGGAAG
CGGAAT	0.9468	0	0		CGGAAT	CGGAAT
CGGACA	0.8854	0	0		CGGACA	CGGACA
CGGACC	1	1	1	CGGACC
CGGACG	0.8854	0	0		CGGACG	CGGACG
CGGACT	0.8854	0	0		CGGACT	CGGACT
CGGAGA	1	1	1	CGGAGA
CGGAGC	0.9919	0	0		CGGAGC	CGGAGC
CGGAGG	1	1	1	CGGAGG
CGGAGT	0.7818	0	0
CGGATA	0.1489	0	0
CGGATC	0.9919	0	0		CGGATC	CGGATC
CGGATG	0.537	0	0
CGGATT	0.2913	0	0
CGGCAA	0.04996	0	0
CGGCAC	0.1489	0	0
CGGCAG	0.6351	0	0
CGGCAT	-0.1489	0	0
CGGCCA	0.04996	0	0
CGGCCC	0.2913	0	0
CGGCCG	0.1489	0	0
CGGCCT	0.04996	0	0
CGGCGA	0.1489	0	0
CGGCGC	0.04996	0	0
CGGCGG	0.3027	0	0
CGGCGT	0.04996	0	0
CGGCTA	0.2913	0	0
CGGCTC	0.7818	0	0
CGGCTG	1	1	1	CGGCTG
CGGCTT	0.1651	0	0
CGGGAA	0.6351	0	0
CGGGAC	0.4621	0	0
CGGGAG	0.4136	0	0
CGGGAT	0.1651	0	0
CGGGCA	0.04996	0	0
CGGGCC	0.04996	0	0
CGGGCG	0	0	0
CGGGCT	0.1489	0	0
CGGGGA	-0.2636	0	0
CGGGGC	-0.04996	0	0
CGGGGG	-1	1	-1	CGGGGG
CGGGGT	-0.8854	0	0		CGGGGT		CGGGGT
CGGGTA	-0.4621	0	0
CGGGTC	0	0	0
CGGGTG	-0.4355	0	0
CGGGTT	-0.6351	0	0
CGGTAA	-0.2913	0	0
CGGTAC	0.04996	0	0
CGGTAG	-0.2913	0	0
CGGTAT	-0.2913	0	0
CGGTCA	0	0	0
CGGTCC	0.112	0	0
CGGTCG	0.112	0	0
CGGTCT	-0.04996	0	0
CGGTGA	0.7818	0	0
CGGTGC	0.1489	0	0
CGGTGG	1	1	1	CGGTGG
CGGTGT	-0.112	0	0
CGGTTA	-0.6351	0	0
CGGTTC	0	0	0
CGGTTG	0	0	0
CGGTTT	-0.8854	0	0		CGGTTT		CGGTTT
CGTAAA	-0.1651	0	0
CGTAAC	0.04996	0	0
CGTAAG	-0.2153	0	0
CGTAAT	-0.1489	0	0
CGTACA	-0.112	0	0
CGTACC	0	0	0
CGTACG	-0.112	0	0
CGTACT	-0.04996	0	0
CGTAGA	0.5459	0	0
CGTAGC	0	0	0
CGTAGG	-1	1	-1	CGTAGG
CGTAGT	-0.6351	0	0
CGTATA	-0.5459	0	0
CGTATC	0.04996	0	0
CGTATG	1	1	1	CGTATG
CGTATT	-0.112	0	0
CGTCAA	0.7818	0	0
CGTCAC	0.4621	0	0
CGTCAG	0.4621	0	0
CGTCAT	-0.112	0	0
CGTCCA	0	0	0
CGTCCC	0	0	0
CGTCCG	-0.2913	0	0
CGTCCT	0.1974	0	0
CGTCGA	0.9468	0	0		CGTCGA	CGTCGA
CGTCGC	1	1	1	CGTCGC
CGTCGG	0.112	0	0
CGTCGT	0	0	0
CGTCTA	0	0	0
CGTCTC	0.04996	0	0
CGTCTG	0.7818	0	0
CGTCTT	-0.04996	0	0
CGTGAA	1	1	1	CGTGAA
CGTGAC	0.7818	0	0
CGTGAG	1	1	1	CGTGAG
CGTGAT	0.2913	0	0
CGTGCA	0.4355	0	0
CGTGCC	0	0	0
CGTGCG	0.1974	0	0
CGTGCT	0.1974	0	0
CGTGGA	1	1	1	CGTGGA
CGTGGC	0.4219	0	0
CGTGGG	-0.4621	0	0
CGTGGT	0.112	0	0
CGTGTA	-0.2449	0	0
CGTGTC	0.04996	0	0
CGTGTG	0.1974	0	0
CGTGTT	-0.3027	0	0
CGTTAA	-0.112	0	0
CGTTAC	-0.04996	0	0
CGTTAG	-0.5459	0	0
CGTTAT	-0.7818	0	0
CGTTCA	-1	1	-1	CGTTCA
CGTTCC	-1	1	-1	CGTTCC
CGTTCG	-1	1	-1	CGTTCG
CGTTCT	-1	1	-1	CGTTCT
CGTTGA	0.1974	0	0
CGTTGC	0	0	0
CGTTGG	0	0	0
CGTTGT	-0.2913	0	0
CGTTTA	-0.8854	0	0		CGTTTA		CGTTTA
CGTTTC	-0.4219	0	0
CGTTTG	-0.5459	0	0
CGTTTT	-0.9468	0	0		CGTTTT		CGTTTT
CTAAAA	-0.3364	0	0
CTAAAC	0.1489	0	0
CTAAAG	0.4621	0	0
CTAAAT	-0.3027	0	0
CTAACA	0.1974	0	0
CTAACC	0.04996	0	0
CTAACG	0.04996	0	0
CTAACT	-0.112	0	0
CTAAGA	0.2913	0	0
CTAAGC	0.04996	0	0
CTAAGG	-0.2449	0	0
CTAAGT	-0.6351	0	0
CTAATA	-0.1489	0	0
CTAATC	0.04996	0	0
CTAATG	-0.8483	0	0		CTAATG		CTAATG
CTAATT	-0.6351	0	0
CTACAA	0.6351	0	0
CTACAC	0.6351	0	0
CTACAG	0.6351	0	0
CTACAT	1	1	1	CTACAT
CTACCA	0.1489	0	0
CTACCC	0.04996	0	0
CTACCG	0	0	0
CTACCT	0.2913	0	0
CTACGA	0.6351	0	0
CTACGC	0	0	0
CTACGG	-0.04996	0	0
CTACGT	0	0	0
CTACTA	-0.4621	0	0
CTACTC	0.04996	0	0
CTACTG	0.2913	0	0
CTACTT	-0.1651	0	0
CTAGAA	0.8854	0	0		CTAGAA	CTAGAA
CTAGAC	0.4621	0	0
CTAGAG	0.1974	0	0
CTAGAT	0	0	0
CTAGCA	0.1489	0	0
CTAGCC	0.1489	0	0
CTAGCG	0	0	0
CTAGCT	0.112	0	0
CTAGGA	0.2636	0	0
CTAGGC	-0.4219	0	0
CTAGGG	-1	1	-1	CTAGGG
CTAGGT	-1	1	-1	CTAGGT
CTAGTA	-0.1974	0	0
CTAGTC	0.04996	0	0
CTAGTG	-0.2449	0	0
CTAGTT	-0.8854	0	0		CTAGTT		CTAGTT
CTATAA	-0.4621	0	0
CTATAC	-0.04996	0	0
CTATAG	-0.3027	0	0
CTATAT	-0.8483	0	0		CTATAT		CTATAT
CTATCA	0.1489	0	0
CTATCC	0	0	0
CTATCG	0.04996	0	0
CTATCT	-0.4621	0	0
CTATGA	0.04996	0	0
CTATGC	-0.2449	0	0
CTATGG	-0.2449	0	0
CTATGT	-0.9468	0	0		CTATGT		CTATGT
CTATTA	-0.7818	0	0
CTATTC	-0.1974	0	0
CTATTG	-0.3027	0	0
CTATTT	-1	1	-1	CTATTT
CTCAAA	0.4621	0	0
CTCAAC	0.8854	0	0		CTCAAC	CTCAAC
CTCAAG	1	1	1	CTCAAG
CTCAAT	0.2913	0	0
CTCACA	-0.04996	0	0
CTCACC	0.04996	0	0
CTCACG	0.1489	0	0
CTCACT	0	0	0
CTCAGA	0.4621	0	0
CTCAGC	0.9468	0	0		CTCAGC	CTCAGC
CTCAGG	0.3027	0	0
CTCAGT	-0.04996	0	0
CTCATA	-0.2913	0	0
CTCATC	0.1489	0	0
CTCATG	-0.2449	0	0
CTCATT	-0.2913	0	0
CTCCAA	0.8854	0	0		CTCCAA	CTCCAA
CTCCAC	1	1	1	CTCCAC
CTCCAG	0.978	0	0		CTCCAG	CTCCAG
CTCCAT	1	1	1	CTCCAT
CTCCCA	0.04996	0	0
CTCCCC	0.1489	0	0
CTCCCG	0.1489	0	0
CTCCCT	0.1489	0	0
CTCCGA	0.1489	0	0
CTCCGC	0.2913	0	0
CTCCGG	0.4621	0	0
CTCCGT	-0.1974	0	0
CTCCTA	0.1489	0	0
CTCCTC	0.8854	0	0		CTCCTC	CTCCTC
CTCCTG	1	1	1	CTCCTG
CTCCTT	0.1974	0	0
CTCGAA	1	1	1	CTCGAA
CTCGAC	0.9468	0	0		CTCGAC	CTCGAC
CTCGAG	1	1	1	CTCGAG
CTCGAT	0.6351	0	0
CTCGCA	0.04996	0	0
CTCGCC	0.04996	0	0
CTCGCG	0.1489	0	0
CTCGCT	0.04996	0	0
CTCGGA	0.6351	0	0
CTCGGC	1	1	1	CTCGGC
CTCGGG	0	0	0
CTCGGT	0.112	0	0
CTCGTA	-0.112	0	0
CTCGTC	0.2913	0	0
CTCGTG	0.2913	0	0
CTCGTT	-0.2913	0	0
CTCTAA	0	0	0
CTCTAC	0.112	0	0
CTCTAG	0	0	0
CTCTAT	-0.3027	0	0
CTCTCA	0	0	0
CTCTCC	0.1489	0	0
CTCTCG	0.04996	0	0
CTCTCT	-0.4777	0	0
CTCTGA	0.978	0	0		CTCTGA	CTCTGA
CTCTGC	1	1	1	CTCTGC
CTCTGG	0.978	0	0		CTCTGG	CTCTGG
CTCTGT	0.2449	0	0
CTCTTA	-0.2913	0	0
CTCTTC	0.1974	0	0
CTCTTG	0.112	0	0
CTCTTT	-0.8854	0	0		CTCTTT		CTCTTT
CTGAAA	1	1	1	CTGAAA
CTGAAC	1	1	1	CTGAAC
CTGAAG	1	1	1	CTGAAG
CTGAAT	0.978	0	0		CTGAAT	CTGAAT
CTGACA	0.9468	0	0		CTGACA	CTGACA
CTGACC	1	1	1	CTGACC
CTGACG	1	1	1	CTGACG
CTGACT	0.9919	0	0		CTGACT	CTGACT
CTGAGA	0.9919	0	0		CTGAGA	CTGAGA
CTGAGC	1	1	1	CTGAGC
CTGAGG	1	1	1	CTGAGG
CTGAGT	0.4219	0	0
CTGATA	0.112	0	0
CTGATC	1	1	1	CTGATC
CTGATG	0.7668	0	0
CTGATT	0	0	0
CTGCAA	0.978	0	0		CTGCAA	CTGCAA
CTGCAC	0.978	0	0		CTGCAC	CTGCAC
CTGCAG	1	1	1	CTGCAG
CTGCAT	0.4355	0	0
CTGCCA	1	1	1	CTGCCA
CTGCCC	1	1	1	CTGCCC
CTGCCG	0.9468	0	0		CTGCCG	CTGCCG
CTGCCT	0.6351	0	0
CTGCGA	0.4621	0	0
CTGCGC	0.4621	0	0
CTGCGG	0.7818	0	0
CTGCGT	0.04996	0	0
CTGCTA	0.6351	0	0
CTGCTC	1	1	1	CTGCTC
CTGCTG	1	1	1	CTGCTG
CTGCTT	0.2449	0	0
CTGGAA	1	1	1	CTGGAA
CTGGAC	1	1	1	CTGGAC
CTGGAG	1	1	1	CTGGAG
CTGGAT	1	1	1	CTGGAT
CTGGCA	0.4219	0	0
CTGGCC	0.8854	0	0		CTGGCC	CTGGCC
CTGGCG	1	1	1	CTGGCG
CTGGCT	1	1	1	CTGGCT
CTGGGA	0.1651	0	0
CTGGGC	0.3027	0	0
CTGGGG	-0.5964	0	0
CTGGGT	-0.3364	0	0
CTGGTA	-0.1651	0	0
CTGGTC	0.7818	0	0
CTGGTG	1	1	1	CTGGTG
CTGGTT	-0.2913	0	0
CTGTAA	0	0	0
CTGTAC	0.4621	0	0
CTGTAG	1	1	1	CTGTAG
CTGTAT	-0.537	0	0
CTGTCA	0	0	0
CTGTCC	0.6351	0	0
CTGTCG	1	1	1	CTGTCG
CTGTCT	-0.2449	0	0
CTGTGA	0.6351	0	0
CTGTGC	1	1	1	CTGTGC
CTGTGG	1	1	1	CTGTGG
CTGTGT	0	0	0
CTGTTA	-0.6351	0	0
CTGTTC	-0.3103	0	0
CTGTTG	0.4621	0	0
CTGTTT	-1	1	-1	CTGTTT
CTTAAA	-0.2913	0	0
CTTAAC	-0.1651	0	0
CTTAAG	0.2449	0	0
CTTAAT	-0.8854	0	0		CTTAAT		CTTAAT
CTTACA	-0.1489	0	0
CTTACC	0	0	0
CTTACG	-0.112	0	0
CTTACT	-0.4621	0	0
CTTAGA	-0.2449	0	0
CTTAGC	-0.1974	0	0
CTTAGG	-1	1	-1	CTTAGG
CTTAGT	-1	1	-1	CTTAGT
CTTATA	-0.8854	0	0		CTTATA		CTTATA
CTTATC	-0.112	0	0
CTTATG	-1	1	-1	CTTATG
CTTATT	-0.9919	0	0		CTTATT		CTTATT
[truncated: 2,096 more rows]
