# Supplementary material for: Strategies for Identifying RNA Splicing Regulatory Motifs and Predicting Alternative Splicing Events
Source: PLoS Comput Biol. 2008 Jan 25;4(1):e21. doi: 10.1371/journal.pcbi.0040021 (PMC2217580; doi:10.1371/journal.pcbi.0040021)
Supplement: Table S2 — (42 KB PDF) [file pcbi.0040021.st002.pdf]

**Table 2.** Selection and overview of several comprehensive motif searches for predicted exonic splicing enhancer (ESE) or silencer (ESS) sequences in mammalian genomes, including ESE-FINDER [40], RESCUE-ESE [28], FAS-ESS [27], PESE/PESS [42], ESR [43], ISRE [44], NI-ESE/NI-ESS elements [46]. All methods are based on the under- or overrepresentation of specific penta- to octamers in exons or introns, and all but one are based on consensus oligonucleotides to search for splicing signals (ESE-FINDER uses position-specific scoring matrices). More differences exist regarding the discrimination of predicted elements (e.g., exon versus intron, exon versus pseudoexon, non-coding versus coding exon) as well as in the extent of phylogenetic conservation.

| Motif search    | Background                                                                                                                                                                    | Size                                             | Features                        |           | Species                                                                             | Availability                                                                                                                                    |
|-----------------|-------------------------------------------------------------------------------------------------------------------------------------------------------------------------------|--------------------------------------------------|---------------------------------|-----------|-------------------------------------------------------------------------------------|-------------------------------------------------------------------------------------------------------------------------------------------------|
|                 |                                                                                                                                                                               |                                                  | Experimentally verified         | predicted |                                                                                     |                                                                                                                                                 |
| ESE-FINDER      | SELEX-derived position-specific weight matrices for the family of SR proteins: ASF/SF2, SRp40, SC35, and SRp55                                                                | 4                                                | 4/4                             |           | <i>H.sapiens</i>                                                                    | Web server<br><a href="http://rulai.cshl.edu/tools/ESE">http://rulai.cshl.edu/tools/ESE</a> [40]                                                |
| RESCUE-ESE/ISE  | Hexamer nucleotides statistically enriched in constitutive exons, with weak to moderate splice site strengths, versus introns                                                 | 238                                              | 10/238                          |           | <i>H.sapiens</i><br><i>M.musculus</i><br><i>F.rubripes</i>                          | Complete set from RESCUE-ESE web server, <a href="http://genes.mit.edu/burgelab/rescue-ease">http://genes.mit.edu/burgelab/rescue-ease</a> [28] |
| FAS-ESS         | GFP-based reporter system for detecting splicing-silencing activity, using a pool of random decamer nucleotides                                                               | 133                                              | 14/21 heterologous exon context |           | <i>H.sapiens</i>                                                                    | Complete set from FAS-ESE web server, <a href="http://genes.mit.edu/fas-ess/">http://genes.mit.edu/fas-ess/</a> [27]                            |
| PESE (PESS)     | Octamer nucleotides statistically enriched in internal non-coding exons versus both pseudoexons and exons in 5'UTRs                                                           | 2,069 (974)                                      | 10/12 (8/8) minigene construct  |           | <i>H.sapiens</i>                                                                    | Complete set from authors' web site [42]                                                                                                        |
| ESR             | Dicodon (hexamer) nucleotides statistically enriched and evolutionary conserved in exons of orthologous genes                                                                 | 285                                              | 10/285 minigene construct       |           | <i>H.sapiens</i><br><i>M.musculus</i>                                               | Supplementary material [43]                                                                                                                     |
| ISRE            | Penta-, hexa- and heptamer nucleotides statistically enriched and evolutionary conserved in intronic regions flanking exons of orthologous genes                              | 314                                              | 61/68 minigene construct        |           | <i>H.sapiens</i><br><i>M.musculus</i><br><i>C.familiaris</i><br><i>R.norvegicus</i> | Supplementary material [44]                                                                                                                     |
| NI-ESE (NI-ESS) | Hexamer nucleotides with ESE or ESS activity, based on the sequence "closeness" of displayed among previously determined RESCUE-ESE and PESE as well as FAS-ESS and PESS sets | *<br>313 (110)<br><br>*<br>NI cutoff: 0.8 (-0.8) | 9/24 minigene construct         |           | <i>H.sapiens</i>                                                                    | Supplementary material [46]                                                                                                                     |
