# Supplementary material for: Strategies for Identifying RNA Splicing Regulatory Motifs and Predicting Alternative Splicing Events
Source: PLoS Comput Biol. 2008 Jan 25;4(1):e21. doi: 10.1371/journal.pcbi.0040021 (PMC2217580; doi:10.1371/journal.pcbi.0040021)
Supplement: Table S5 — (32 KB PDF) [file pcbi.0040021.st005.pdf]

**Table 5.** Selection of several algorithms for *ab initio* detection of alternative exons and/or intron-retention events. The table contains examples for both exon classification and exon discovery.

| Algorithms for predicting alternative exons                                                                                                                                                                                                                                          | Contact                                                                                                                                       |
|--------------------------------------------------------------------------------------------------------------------------------------------------------------------------------------------------------------------------------------------------------------------------------------|-----------------------------------------------------------------------------------------------------------------------------------------------|
| Prediction of ~1,000 AS events involving known exons that are conserved between <i>H.sapiens</i> and <i>M.musculus</i> , based on feature selection and support vector machine classification [57]                                                                                   | <b>E-mail:</b><br>gideon@mta.ac.il                                                                                                            |
| Classification of orthologous and splicing-conserved alternative exons in <i>Drosophila melanogaster</i> and <i>D.pseudoobscura</i> , which predicted ~160 alternative exons (various AS types) in the fly [55]                                                                      | <b>Website:</b><br><a href="http://genetics.uchc.edu/Graveley">http://genetics.uchc.edu/Graveley</a>                                          |
| <b>ACESCAN:</b> Classification of orthologous and alternative splicing-conserved exons (ACEs); predicted ~2,000 skipped ACEs in <i>H.sapiens</i> and <i>M.musculus</i> genes, based on motifs and generic sequence features, with experimentally validated specificity of ~70%. [50] | <b>Webserver:</b><br><a href="http://genes.mit.edu/acescan">http://genes.mit.edu/acescan</a>                                                  |
| <b>UNCOVER:</b> PairHMM to discover new AS events (skipped exons and retention-type introns) that are conserved in <i>H.sapiens</i> and <i>M.musculus</i> , which predicted ~50 novel skipped exons in the ENCODE region and genome-wide about two dozen retained introns [59]       | <b>Software:</b><br><a href="http://genes.mit.edu/burgelab/software.html">http://genes.mit.edu/burgelab/software.html</a>                     |
| <b>RASE:</b> Application of support vector machines to classify or discover skipped exons in <i>Caenorhabditis.elegans</i> , which predicted ~200 candidate alternative exons. [54]                                                                                                  | <b>Software:</b><br><a href="http://www.fml.tuebingen.mpg.de/raetsch/projects/RASE">http://www.fml.tuebingen.mpg.de/raetsch/projects/RASE</a> |
| <b>PASE:</b> Discovery of skipped exons including signal peptide sequences, which validated of 33 new <i>C.elegans</i> and 26 new <i>H.sapiens</i> alternative exons [64]                                                                                                            | <b>E-mail:</b><br>rmitra@genetics.wustl.edu                                                                                                   |
| Prediction of new mRNA isoforms involving AS events of both exon skipping and retention-type introns, based on the presence of PFAM protein domains [63]                                                                                                                             | <b>E-mail:</b><br>hiller@informatik.uni-freiburg.de                                                                                           |
